# Supplementary material for: Observation and modelling of HO x radicals in a boreal forest
Source: Copernicus journal article supplement (doi:10.5194/acp-14-8723-2014), 2014-08-26
Supplement: Supplementary file 1 [file acp-14-8723-2014-supplement.zip]

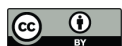

## *Supplement of*

# **Observation and modelling of HO<sub>x</sub> radicals in a boreal forest**

**K. Hens et al.**

*Correspondence to:* H. Harder ([hartwig.harder@mpic.de](mailto:hartwig.harder@mpic.de))

- Supplement-Cover-Letter.pdf
- Supplement
  - Supplement\_meas.pdf
  - Supplement\_mechanism.pdf
