# Supplementary material for: Observation and modelling of HO x radicals in a boreal forest
Source: Copernicus journal article supplement (doi:10.5194/acp-14-8723-2014), 2014-08-26
Supplement: Supplementary file 2 [file acp-14-8723-2014-supplement.zip]

# The Chemical Mechanism of MECCA

KPP version: 2.2.1\_rs5

MECCA version: 3.3

Date: June 30, 2014.

Selected reactions:

“Tr && G && !S && !Cl && !Br && !I && !Hg”

Number of aerosol phases: 0

Number of species in selected mechanism:

Gas phase: 395

Aqueous phase: 0

All species: 395

Number of reactions in selected mechanism:

Gas phase (Gnn): 979

Aqueous phase (Annn): 0

Henry (Hnnn): 0

Photolysis (Jnn): 102

Heterogeneous (HETnnn): 0

Equilibria (EQnn): 0

Isotope exchange (DGnn): 0

Dummy (Dnn): 0

All equations: 1081

Table 1: Gas phase reactions

| #      | labels | reaction                                                                          | rate coefficient                                                                          | reference                                                |
|--------|--------|-----------------------------------------------------------------------------------|-------------------------------------------------------------------------------------------|----------------------------------------------------------|
| G1000  | StTrG  | $\text{O}_2 + \text{O}(^1\text{D}) \rightarrow \text{O}(^3\text{P}) + \text{O}_2$ | $3.2\text{E-}11*\text{EXP}(70./\text{temp})$                                              | Sander et al. (2003)                                     |
| G1001  | StTrG  | $\text{O}_2 + \text{O}(^3\text{P}) \rightarrow \text{O}_3$                        | $6.\text{E-}34*((\text{temp}/300.)**(-2.4))*\text{cair}$                                  | Sander et al. (2003)                                     |
| G2100  | StTrG  | $\text{H} + \text{O}_2 \rightarrow \text{HO}_2$                                   | $\text{k\_3rd}(\text{temp}, \text{cair}, 5.7\text{E-}32, 1.6, 7.5\text{E-}11, 0., 0.6)$   | Sander et al. (2003)                                     |
| G2104  | StTrG  | $\text{OH} + \text{O}_3 \rightarrow \text{HO}_2$                                  | $1.7\text{E-}12*\text{EXP}(-940./\text{temp})$                                            | Sander et al. (2003)                                     |
| G2105  | StTrG  | $\text{OH} + \text{H}_2 \rightarrow \text{H}_2\text{O} + \text{H}$                | $2.8\text{E-}12*\text{EXP}(-1800./\text{temp})$                                           | Sander et al. (2006)                                     |
| G2107  | StTrG  | $\text{HO}_2 + \text{O}_3 \rightarrow \text{OH}$                                  | $1.\text{E-}14*\text{EXP}(-490./\text{temp})$                                             | Sander et al. (2003)                                     |
| G2109  | StTrG  | $\text{HO}_2 + \text{OH} \rightarrow \text{H}_2\text{O}$                          | $4.8\text{E-}11*\text{EXP}(250./\text{temp})$                                             | Sander et al. (2003)                                     |
| G2110  | StTrG  | $\text{HO}_2 + \text{HO}_2 \rightarrow \text{H}_2\text{O}_2$                      | $\text{k\_HO2\_HO2}$                                                                      | Christensen et al. (2002),<br>Kircher and Sander (1984)* |
| G2111  | StTrG  | $\text{H}_2\text{O} + \text{O}(^1\text{D}) \rightarrow 2 \text{OH}$               | $2.2\text{E-}10$                                                                          | Sander et al. (2003)                                     |
| G2112  | StTrG  | $\text{H}_2\text{O}_2 + \text{OH} \rightarrow \text{H}_2\text{O} + \text{HO}_2$   | $2.9\text{E-}12*\text{EXP}(-160./\text{temp})$                                            | Sander et al. (2003)                                     |
| G3101  | StTrG  | $\text{N}_2 + \text{O}(^1\text{D}) \rightarrow \text{O}(^3\text{P}) + \text{N}_2$ | $1.8\text{E-}11*\text{EXP}(110./\text{temp})$                                             | Sander et al. (2003)                                     |
| G3103  | StTrGN | $\text{NO} + \text{O}_3 \rightarrow \text{NO}_2 + \text{O}_2$                     | $3.\text{E-}12*\text{EXP}(-1500./\text{temp})$                                            | Sander et al. (2003)                                     |
| G3106  | StTrGN | $\text{NO}_2 + \text{O}_3 \rightarrow \text{NO}_3 + \text{O}_2$                   | $1.2\text{E-}13*\text{EXP}(-2450./\text{temp})$                                           | Sander et al. (2003)                                     |
| G3108  | StTrGN | $\text{NO}_3 + \text{NO} \rightarrow 2 \text{NO}_2$                               | $1.5\text{E-}11*\text{EXP}(170./\text{temp})$                                             | Sander et al. (2003)                                     |
| G3109  | StTrGN | $\text{NO}_3 + \text{NO}_2 \rightarrow \text{N}_2\text{O}_5$                      | $\text{k\_NO3\_NO2}$                                                                      | Sander et al. (2003)*                                    |
| G3110  | StTrGN | $\text{N}_2\text{O}_5 \rightarrow \text{NO}_2 + \text{NO}_3$                      | $\text{k\_NO3\_NO2}/(3.\text{E-}27*\text{EXP}(10990./\text{temp}))$                       | Sander et al. (2003)*                                    |
| G3200  | TrG    | $\text{NO} + \text{OH} \rightarrow \text{HONO}$                                   | $\text{k\_3rd}(\text{temp}, \text{cair}, 7.\text{E-}31, 2.6, 3.6\text{E-}11, 0.1, 0.6)$   | Sander et al. (2003)                                     |
| G3201  | StTrGN | $\text{NO} + \text{HO}_2 \rightarrow \text{NO}_2 + \text{OH}$                     | $3.5\text{E-}12*\text{EXP}(250./\text{temp})$                                             | Sander et al. (2003)                                     |
| G3202  | StTrGN | $\text{NO}_2 + \text{OH} \rightarrow \text{HNO}_3$                                | $\text{k\_3rd}(\text{temp}, \text{cair}, 1.48\text{E-}30, 3., 2.58\text{E-}11, 0., 0.6)$  | Mollner et al. (2010)                                    |
| G3203  | StTrGN | $\text{NO}_2 + \text{HO}_2 \rightarrow \text{HNO}_4$                              | $\text{k\_NO2\_HO2}$                                                                      | Sander et al. (2003)*                                    |
| G3204  | TrGN   | $\text{NO}_3 + \text{HO}_2 \rightarrow \text{NO}_2 + \text{OH} + \text{O}_2$      | $3.5\text{E-}12$                                                                          | Sander et al. (2003)                                     |
| G3205  | TrG    | $\text{HONO} + \text{OH} \rightarrow \text{NO}_2 + \text{H}_2\text{O}$            | $1.8\text{E-}11*\text{EXP}(-390./\text{temp})$                                            | Sander et al. (2003)                                     |
| G3206  | StTrGN | $\text{HNO}_3 + \text{OH} \rightarrow \text{H}_2\text{O} + \text{NO}_3$           | $\text{k\_HNO3\_OH}$                                                                      | Sander et al. (2003)*                                    |
| G3207  | StTrGN | $\text{HNO}_4 \rightarrow \text{NO}_2 + \text{HO}_2$                              | $\text{k\_NO2\_HO2}/(2.1\text{E-}27*\text{EXP}(10900./\text{temp}))$                      | Sander et al. (2003)*                                    |
| G3208  | StTrGN | $\text{HNO}_4 + \text{OH} \rightarrow \text{NO}_2 + \text{H}_2\text{O}$           | $1.3\text{E-}12*\text{EXP}(380./\text{temp})$                                             | Sander et al. (2003)                                     |
| G4101  | StTrG  | $\text{CH}_4 + \text{OH} \rightarrow \text{CH}_3\text{O}_2 + \text{H}_2\text{O}$  | $1.85\text{E-}20*\text{EXP}(2.82*\log(\text{temp})-987./\text{temp})$                     | Atkinson (2003)                                          |
| G4102  | TrG    | $\text{CH}_3\text{OH} + \text{OH} \rightarrow \text{HCHO} + \text{HO}_2$          | $7.3\text{E-}12*\text{EXP}(-620./\text{temp})$                                            | Sander et al. (2003)                                     |
| G4103a | StTrG  | $\text{CH}_3\text{O}_2 + \text{HO}_2 \rightarrow \text{CH}_3\text{OOH}$           | $4.1\text{E-}13*\text{EXP}(750./\text{temp})/(1.+1./497.7*\text{EXP}(1160./\text{temp}))$ | Sander et al. (2003)*                                    |

Table 1: Gas phase reactions (... continued)

| #       | labels | reaction                                                                                                                                                             | rate coefficient                                                                                                                     | reference                  |
|---------|--------|----------------------------------------------------------------------------------------------------------------------------------------------------------------------|--------------------------------------------------------------------------------------------------------------------------------------|----------------------------|
| G4103b  | StTrG  | $\text{CH}_3\text{O}_2 + \text{HO}_2 \rightarrow \text{HCHO} + \text{H}_2\text{O} + \text{O}_2$                                                                      | $4.1\text{E-}13 \cdot \text{EXP}(750./\text{temp}) / (1. + 497.7 \cdot \text{EXP}(-1160./\text{temp}))$                              | Sander et al. (2003)*      |
| G4104   | StTrGN | $\text{CH}_3\text{O}_2 + \text{NO} \rightarrow \text{HCHO} + \text{NO}_2 + \text{HO}_2$                                                                              | $2.8\text{E-}12 \cdot \text{EXP}(300./\text{temp})$                                                                                  | Sander et al. (2003)       |
| G4105   | TrGN   | $\text{CH}_3\text{O}_2 + \text{NO}_3 \rightarrow \text{HCHO} + \text{HO}_2 + \text{NO}_2$                                                                            | $1.3\text{E-}12$                                                                                                                     | Atkinson et al. (1999)     |
| G4106a  | StTrG  | $\text{CH}_3\text{O}_2 \rightarrow \text{HCHO} + \text{HO}_2$                                                                                                        | $2. \cdot \text{R02} \cdot 9.5\text{E-}14 \cdot \text{EXP}(390./\text{temp}) / (1. + 1. / 26.2 \cdot \text{EXP}(1130./\text{temp}))$ | Sander et al. (2003)       |
| G4106b  | StTrG  | $\text{CH}_3\text{O}_2 \rightarrow .5 \text{ HCHO} + .5 \text{ CH}_3\text{OH}$                                                                                       | $2. \cdot \text{R02} \cdot 9.5\text{E-}14 \cdot \text{EXP}(390./\text{temp}) / (1. + 26.2 \cdot \text{EXP}(-1130./\text{temp}))$     | Sander et al. (2003)       |
| G4107   | StTrG  | $\text{CH}_3\text{OOH} + \text{OH} \rightarrow .6 \text{ CH}_3\text{O}_2 + .4 \text{ HCHO} + .4 \text{ OH} + \text{H}_2\text{O}$                                     | k_CH300H_OH                                                                                                                          | see note                   |
| G4108   | StTrG  | $\text{HCHO} + \text{OH} \rightarrow \text{CO} + \text{H}_2\text{O} + \text{HO}_2$                                                                                   | $9.52\text{E-}18 \cdot \text{EXP}(2.03 \cdot \log(\text{temp}) + 636./\text{temp})$                                                  | Sivakumaran et al. (2003)  |
| G4109   | TrGN   | $\text{HCHO} + \text{NO}_3 \rightarrow \text{HNO}_3 + \text{CO} + \text{HO}_2$                                                                                       | $3.4\text{E-}13 \cdot \text{EXP}(-1900./\text{temp})$                                                                                | Sander et al. (2003)*      |
| G4110   | StTrG  | $\text{CO} + \text{OH} \rightarrow \text{H} + \text{CO}_2$                                                                                                           | $1.57\text{E-}13 + \text{cair} \cdot 3.54\text{E-}33$                                                                                | McCabe et al. (2001)       |
| G4111   | TrG    | $\text{HCOOH} + \text{OH} \rightarrow \text{CO}_2 + \text{HO}_2 + \text{H}_2\text{O}$                                                                                | $4.5\text{E-}13$                                                                                                                     | IUPAC (2013)               |
| G4112e  | TrGC   | $\text{HCHO} + \text{HO}_2 \rightarrow \text{HOCH}_2\text{O}_2$                                                                                                      | $7.7\text{E-}15 \cdot \text{EXP}(625./\text{temp})$                                                                                  | IUPAC (2013)               |
| G4113e  | TrGC   | $\text{HOCH}_2\text{O}_2 \rightarrow \text{HCHO} + \text{HO}_2$                                                                                                      | $2.\text{E}12 \cdot \text{EXP}(-7000./\text{temp})$                                                                                  | IUPAC (2013)               |
| G4114e  | TrGC   | $\text{HOCH}_2\text{O}_2 + \text{HO}_2 \rightarrow .5 \text{ HOCH}_2\text{OOH} + .5 \text{ HCOOH} + .2 \text{ OH} + .2 \text{ HO}_2 + .3 \text{ H}_2\text{O}$        | $5.6\text{E-}15 \cdot \text{EXP}(2300./\text{temp})$                                                                                 | Jenkin et al. (2007)       |
| G4115e  | TrGC   | $\text{HOCH}_2\text{O}_2 + \text{NO} \rightarrow \text{NO}_2 + \text{HO}_2 + \text{HCOOH}$                                                                           | $2.8\text{E-}12 \cdot \text{EXP}(300./\text{temp})$                                                                                  | Sander et al. (2003)       |
| G4116e  | TrGC   | $\text{HOCH}_2\text{O}_2 + \text{NO}_3 \rightarrow \text{NO}_2 + \text{HO}_2 + \text{HCOOH}$                                                                         | $1.2\text{E-}12$                                                                                                                     | see note                   |
| G4117e  | TrGC   | $\text{HOCH}_2\text{O}_2 \rightarrow \text{HCOOH} + .62 \text{ HO}_2$                                                                                                | $1.4\text{E-}12 \cdot \text{R02}$                                                                                                    | see note                   |
| G4118e  | TrGC   | $\text{HOCH}_2\text{OOH} + \text{OH} \rightarrow \text{HOCH}_2\text{O}_2 + \text{H}_2\text{O}$                                                                       | $0.6 \cdot \text{k\_CH300H\_OH} + \text{krohro}$                                                                                     | see note                   |
| G4119e  | TrGC   | $\text{HOCH}_2\text{OOH} + \text{OH} \rightarrow \text{OH} + \text{HCOOH} + \text{H}_2\text{O}$                                                                      | k_s*fsoh*fsooh                                                                                                                       | see note                   |
| G4200   | TrGC   | $\text{C}_2\text{H}_6 + \text{OH} \rightarrow \text{C}_2\text{H}_5\text{O}_2 + \text{H}_2\text{O}$                                                                   | $1.49\text{E-}17 \cdot \text{temp} \cdot \text{temp} \cdot \text{EXP}(-499./\text{temp})$                                            | Atkinson (2003)            |
| G4201e  | TrGC   | $\text{C}_2\text{H}_4 + \text{O}_3 \rightarrow \text{HCHO} + .63 \text{ CO} + .13 \text{ HO}_2 + 0.37 \text{ HOCH}_2\text{OOH} + .13 \text{ OH}$                     | $1.2\text{E-}14 \cdot \text{EXP}(-2630./\text{temp})$                                                                                | Sander et al. (2003)*      |
| G4202   | TrGC   | $\text{C}_2\text{H}_4 + \text{OH} \rightarrow \text{HOCH}_2\text{CH}_2\text{O}_2 + \text{H}_2\text{O}$                                                               | k_3rd(temp, cair, 1.E-28, 0.8, 8.8E-12, 0., 0.6)                                                                                     | Sander et al. (2003)       |
| G4203   | TrGC   | $\text{C}_2\text{H}_5\text{O}_2 + \text{HO}_2 \rightarrow \text{C}_2\text{H}_5\text{OOH}$                                                                            | $7.5\text{E-}13 \cdot \text{EXP}(700./\text{temp})$                                                                                  | Sander et al. (2003)       |
| G4204   | TrGNC  | $\text{C}_2\text{H}_5\text{O}_2 + \text{NO} \rightarrow \text{CH}_3\text{CHO} + \text{HO}_2 + \text{NO}_2$                                                           | $2.6\text{E-}12 \cdot \text{EXP}(365./\text{temp})$                                                                                  | Sander et al. (2003)       |
| G4205   | TrGNC  | $\text{C}_2\text{H}_5\text{O}_2 + \text{NO}_3 \rightarrow \text{CH}_3\text{CHO} + \text{HO}_2 + \text{NO}_2$                                                         | $2.3\text{E-}12$                                                                                                                     | Atkinson et al. (1999)     |
| G4206   | TrGC   | $\text{C}_2\text{H}_5\text{O}_2 \rightarrow .98 \text{ CH}_3\text{CHO} + .38 \text{ HO}_2 + .02 \text{ HOCH}_2\text{CH}_2\text{O}_2$                                 | $3.1\text{E-}13 \cdot \text{R02}$                                                                                                    | Rickard and Pascoe (2009)* |
| G4207   | TrGC   | $\text{C}_2\text{H}_5\text{OOH} + \text{OH} \rightarrow .43 \text{ C}_2\text{H}_5\text{O}_2 + .43 \text{ H}_2\text{O} + .57 \text{ CH}_3\text{CHO} + .57 \text{ OH}$ | $0.6 \cdot \text{k\_CH300H\_OH} + 8.01\text{E-}12$                                                                                   | see note                   |
| G4208ea | TrGC   | $\text{CH}_3\text{CHO} + \text{OH} \rightarrow \text{CH}_3\text{C(O)OO} + \text{H}_2\text{O}$                                                                        | $4.4\text{E-}12 \cdot \text{EXP}(365./\text{temp}) \cdot 0.95$                                                                       | Atkinson et al. (2006)     |

Table 1: Gas phase reactions (... continued)

| #        | labels | reaction                                                                                                                                                                  | rate coefficient                                   | reference                  |
|----------|--------|---------------------------------------------------------------------------------------------------------------------------------------------------------------------------|----------------------------------------------------|----------------------------|
| G4208eb  | TrGC   | $\text{CH}_3\text{CHO} + \text{OH} \rightarrow .84 \text{HCOCH}_2\text{O}_2 + .1 \text{HCHO} + .1 \text{CO}$<br>$+ .06 \text{GLYOX} + .16 \text{OH} + \text{H}_2\text{O}$ | $4.4\text{E-}12*\text{EXP}(365./\text{temp})*0.05$ | Atkinson et al. (2006)     |
| G4209    | TrGNC  | $\text{CH}_3\text{CHO} + \text{NO}_3 \rightarrow \text{CH}_3\text{C(O)OO} + \text{HNO}_3$                                                                                 | KN03AL                                             | Sander et al. (2003)       |
| G4210e   | TrGC   | $\text{CH}_3\text{COOH} + \text{OH} \rightarrow \text{CH}_3\text{O}_2 + \text{CO}_2 + \text{H}_2\text{O}$                                                                 | $4.2\text{E-}14*\text{exp}(850./\text{temp})$      | IUPAC (2013)               |
| G4211et1 | TrGC   | $\text{CH}_3\text{C(O)OO} + \text{HO}_2 \rightarrow \text{OH} + \text{CH}_3\text{O}_2 + \text{CO}_2$                                                                      | KAPH02*0.70                                        | Taraborrelli (2014)*       |
| G4211et2 | TrGC   | $\text{CH}_3\text{C(O)OO} + \text{HO}_2 \rightarrow \text{CH}_3\text{C(O)OOH}$                                                                                            | KAPH02*0.12                                        | Taraborrelli (2014)*       |
| G4211et3 | TrGC   | $\text{CH}_3\text{C(O)OO} + \text{HO}_2 \rightarrow \text{CH}_3\text{COOH} + \text{O}_3$                                                                                  | KAPH02*0.18                                        | Taraborrelli (2014)*       |
| G4212    | TrGNC  | $\text{CH}_3\text{C(O)OO} + \text{NO} \rightarrow \text{CH}_3\text{O}_2 + \text{CO}_2 + \text{NO}_2$                                                                      | $8.1\text{E-}12*\text{EXP}(270./\text{temp})$      | Tyndall et al. (2001)      |
| G4213    | TrGNC  | $\text{CH}_3\text{C(O)OO} + \text{NO}_2 \rightarrow \text{PAN}$                                                                                                           | k_CH3C03_N02                                       | Tyndall et al. (2001)*     |
| G4214    | TrGNC  | $\text{CH}_3\text{C(O)OO} + \text{NO}_3 \rightarrow \text{CH}_3\text{O}_2 + \text{NO}_2 + \text{CO}_2$                                                                    | 4.E-12                                             | Canosa-Mas et al. (1996)   |
| G4217    | TrGC   | $\text{CH}_3\text{C(O)OO} \rightarrow .7 \text{CH}_3\text{O}_2 + .7 \text{CO}_2 + .3 \text{CH}_3\text{COOH}$                                                              | $1.00\text{E-}11*\text{R02}$                       | Rickard and Pascoe (2009)  |
| G4218    | TrGC   | $\text{CH}_3\text{C(O)OOH} + \text{OH} \rightarrow \text{CH}_3\text{C(O)OO} + \text{H}_2\text{O}$                                                                         | $0.6*k_{\text{CH300H\_OH}}$                        | Rickard and Pascoe (2009)* |
| G4220    | TrGNC  | $\text{PAN} + \text{OH} \rightarrow \text{HCHO} + \text{CO} + \text{NO}_2 + \text{H}_2\text{O}$                                                                           | $9.50\text{E-}13*\text{EXP}(-650./\text{temp})$    | Rickard and Pascoe (2009)  |
| G4221    | TrGNC  | $\text{PAN} \rightarrow \text{CH}_3\text{C(O)OO} + \text{NO}_2$                                                                                                           | k_PAN_M                                            | Sander et al. (2003)*      |
| G4223e   | TrGC   | $\text{HOCH}_2\text{CHO} + \text{OH} \rightarrow .84 \text{HOCH}_2\text{CO} + .16 \text{HOCHCHO}$<br>$+ .2 \text{HO}_2 + \text{H}_2\text{O}$                              | 8.00E-12                                           | Rickard and Pascoe (2009)  |
| G4224e   | TrGNC  | $\text{HOCH}_2\text{CHO} + \text{NO}_3 \rightarrow \text{HOCH}_2\text{CO} + \text{HNO}_3$                                                                                 | KN03AL                                             | Rickard and Pascoe (2009)  |
| G4255et2 | TrGC   | $\text{HOCH}_2\text{CO} \rightarrow \text{HOCH}_2\text{CO}_3$                                                                                                             | KDEC*.97                                           | Taraborrelli (2014)*       |
| G4255et3 | TrGC   | $\text{HOCH}_2\text{CO} \rightarrow \text{OH} + \text{HCHO} + \text{CO}$                                                                                                  | KDEC*.03                                           | Taraborrelli (2014)*       |
| G4256et2 | TrGC   | $\text{HOCHCHO} \rightarrow \text{GLYOX} + \text{HO}_2$                                                                                                                   | KDEC                                               | Taraborrelli (2014)        |
| G4225    | TrGC   | $\text{HOCH}_2\text{CO}_3 \rightarrow .7 \text{HCHO} + .7 \text{CO}_2 + .7 \text{HO}_2 + .3$<br>$\text{HOCH}_2\text{CO}_2\text{H}$                                        | $1.00\text{E-}11*\text{R02}$                       | Rickard and Pascoe (2009)  |
| G4226ea  | TrGC   | $\text{HOCH}_2\text{CO}_3 + \text{HO}_2 \rightarrow \text{HCHO} + \text{HO}_2 + \text{OH} + \text{CO}_2$                                                                  | KAPH02*rco3_oh                                     | Taraborrelli (2014)*       |
| G4226eb  | TrGC   | $\text{HOCH}_2\text{CO}_3 + \text{HO}_2 \rightarrow \text{HOCH}_2\text{CO}_3\text{H}$                                                                                     | KAPH02*rco3_ooh                                    | Taraborrelli (2014)*       |
| G4226ec  | TrGC   | $\text{HOCH}_2\text{CO}_3 + \text{HO}_2 \rightarrow \text{HOCH}_2\text{CO}_2\text{H} + \text{O}_3$                                                                        | KAPH02*rco3_o3                                     | Taraborrelli (2014)*       |
| G4227    | TrGNC  | $\text{HOCH}_2\text{CO}_3 + \text{NO} \rightarrow \text{NO}_2 + \text{HO}_2 + \text{HCHO} + \text{CO}_2$                                                                  | KAPNO                                              | Rickard and Pascoe (2009)  |
| G4228    | TrGNC  | $\text{HOCH}_2\text{CO}_3 + \text{NO}_2 \rightarrow \text{PHAN}$                                                                                                          | k_CH3C03_N02                                       | Rickard and Pascoe (2009)  |
| G4229    | TrGNC  | $\text{HOCH}_2\text{CO}_3 + \text{NO}_3 \rightarrow \text{NO}_2 + \text{HO}_2 + \text{HCHO} + \text{CO}_2$                                                                | KR02N03*1.60                                       | Rickard and Pascoe (2009)  |
| G4230e   | TrGC   | $\text{HOCH}_2\text{CO}_2\text{H} + \text{OH} \rightarrow .09 \text{HCHO} + .09 \text{CO}_2 + .91$<br>$\text{HCOCO}_2\text{H} + \text{HO}_2 + \text{H}_2\text{O}$         | $\text{kco2h}+\text{ks}*\text{fsoh}*\text{fco2h}$  | Taraborrelli (2014)        |
| G4231ea  | TrGC   | $\text{HOCH}_2\text{CO}_3\text{H} + \text{OH} \rightarrow \text{HOCH}_2\text{CO}_3 + \text{H}_2\text{O}$                                                                  | $0.6*k_{\text{CH300H\_OH}}$                        | Taraborrelli (2014)        |
| G4231eb  | TrGC   | $\text{HOCH}_2\text{CO}_3\text{H} + \text{OH} \rightarrow \text{HCOCO}_3\text{H} + \text{HO}_2$                                                                           | $\text{ks}*\text{fsoh}*\text{fco2h}$               | Taraborrelli (2014)        |
| G4232    | TrGNC  | $\text{PHAN} \rightarrow \text{HOCH}_2\text{CO}_3 + \text{NO}_2$                                                                                                          | k_PAN_M                                            | Rickard and Pascoe (2009)  |
| G4233    | TrGNC  | $\text{PHAN} + \text{OH} \rightarrow \text{HCHO} + \text{CO} + \text{NO}_2 + \text{H}_2\text{O}$                                                                          | 1.12E-12                                           | Rickard and Pascoe (2009)  |

Table 1: Gas phase reactions (... continued)

| #        | labels | reaction                                                                                                                                                                                    | rate coefficient                        | reference                                        |
|----------|--------|---------------------------------------------------------------------------------------------------------------------------------------------------------------------------------------------|-----------------------------------------|--------------------------------------------------|
| G4234e   | TrGC   | GLYOX + OH $\rightarrow$ 1.2 CO + .6 HO <sub>2</sub> + .4 HCOCO3A + H <sub>2</sub> O                                                                                                        | 3.1E-12*EXP(340./temp)                  | IUPAC (2013)                                     |
| G4235e   | TrGNC  | GLYOX + NO <sub>3</sub> $\rightarrow$ 1.2 CO + .6 HO <sub>2</sub> + .4 HCOCO3A + HNO <sub>3</sub>                                                                                           | KN03AL                                  | Rickard and Pascoe (2009)                        |
| G4235et2 | TrGNC  | HCOCO3A $\rightarrow$ 1.5 CO + .5 HO <sub>2</sub> + .5 OH + .5 CO <sub>2</sub>                                                                                                              | KDEC                                    | Taraborrelli (2014)                              |
| G4236    | TrGC   | HCOCO <sub>3</sub> $\rightarrow$ .7 CO + .7 HO <sub>2</sub> + .7 CO <sub>2</sub> + .3 HCOCO <sub>2</sub> H                                                                                  | 1.00E-11*R02                            | Rickard and Pascoe (2009)                        |
| G4237e   | TrGC   | HCOCO <sub>3</sub> + HO <sub>2</sub> $\rightarrow$ HO <sub>2</sub> + CO + CO <sub>2</sub> + OH                                                                                              | KAPH02                                  | Feierabend et al. (2008), Taraborrelli (2014)    |
| G4238    | TrGNC  | HCOCO <sub>3</sub> + NO $\rightarrow$ HO <sub>2</sub> + CO + NO <sub>2</sub> + CO <sub>2</sub>                                                                                              | KAPN0                                   | Rickard and Pascoe (2009)                        |
| G4239    | TrGNC  | HCOCO <sub>3</sub> + NO <sub>3</sub> $\rightarrow$ HO <sub>2</sub> + CO + NO <sub>2</sub> + CO <sub>2</sub>                                                                                 | KR02N03*1.60                            | Rickard and Pascoe (2009)                        |
| G4239t2  | TrGNC  | HCOCO <sub>3</sub> + NO <sub>2</sub> $\rightarrow$ HO <sub>2</sub> + CO + NO <sub>3</sub> + CO <sub>2</sub>                                                                                 | k_CH3C03_N02                            | Orlando and Tyndall (2001), Taraborrelli (2014)* |
| G4240    | TrGC   | HCOCO <sub>2</sub> H + OH $\rightarrow$ CO + HO <sub>2</sub> + CO <sub>2</sub> + H <sub>2</sub> O                                                                                           | kco2h+kt*fo*fco2h                       | Taraborrelli (2014)                              |
| G4241    | TrGC   | HCOCO <sub>3</sub> H + OH $\rightarrow$ .2 HCOCO <sub>3</sub> + .8 CO + .8 OH + .8 CO <sub>2</sub> + H <sub>2</sub> O                                                                       | 0.6*k_CH300H_OH+kt*fo*fco2h             | Taraborrelli (2014)                              |
| G4242    | TrGC   | HOCH <sub>2</sub> CH <sub>2</sub> O <sub>2</sub> $\rightarrow$ .6 HOCH <sub>2</sub> CH <sub>2</sub> O + .2 HOCH <sub>2</sub> CHO + .2 ETHGLY                                                | 2.00E-12*R02                            | Rickard and Pascoe (2009)                        |
| G4244    | TrGC   | HOCH <sub>2</sub> CH <sub>2</sub> O <sub>2</sub> + HO <sub>2</sub> $\rightarrow$ HYETHO2H                                                                                                   | 2.00E-13*EXP(1250./temp)                | Rickard and Pascoe (2009)                        |
| G4243    | TrGNC  | HOCH <sub>2</sub> CH <sub>2</sub> O <sub>2</sub> + NO $\rightarrow$ .24875 HO <sub>2</sub> + .4975 HCHO + .74625 HOCH <sub>2</sub> CH <sub>2</sub> O + .995 NO <sub>2</sub> + .005 ETHOHNO3 | KR02N0                                  | Orlando et al. (1998b)*                          |
| G4245    | TrGNC  | ETHOHNO3 + OH $\rightarrow$ .93 NO3CH2CHO + .93 HO <sub>2</sub> + .07 HOCH <sub>2</sub> CHO + .07 NO <sub>2</sub> + H <sub>2</sub> O                                                        | ks*(fsoh*fch2ono2+fono2*fpch2oh)+krohro | Taraborrelli (2014)                              |
| G4246a   | TrGC   | HYETHO2H + OH $\rightarrow$ HOCH <sub>2</sub> CH <sub>2</sub> O <sub>2</sub> + H <sub>2</sub> O                                                                                             | 0.6*k_CH300H_OH                         | Rickard and Pascoe (2009)                        |
| G4246b   | TrGC   | HYETHO2H + OH $\rightarrow$ HOCH <sub>2</sub> CHO + OH + H <sub>2</sub> O                                                                                                                   | ks*fsoh*fpch2oh                         | Taraborrelli (2014)                              |
| G4246c   | TrGC   | HYETHO2H + OH $\rightarrow$ HOOCH2CHO + HO <sub>2</sub> + H <sub>2</sub> O                                                                                                                  | ks*fsoh*fpch2oh+krohro                  | Taraborrelli (2014)                              |
| G4247a   | TrGC   | HOCH <sub>2</sub> CH <sub>2</sub> O $\rightarrow$ HO <sub>2</sub> + HOCH <sub>2</sub> CHO                                                                                                   | 6.00E-14*EXP(-550./temp)*C(ind_02)      | Orlando et al. (1998b)                           |
| G4247b   | TrGC   | HOCH <sub>2</sub> CH <sub>2</sub> O $\rightarrow$ HO <sub>2</sub> + HCHO + HCHO                                                                                                             | 9.50E+13*EXP(-5988./temp)               | Orlando et al. (1998b)                           |
| G4248    | TrGC   | ETHGLY + OH $\rightarrow$ HOCH <sub>2</sub> CHO + HO <sub>2</sub> + H <sub>2</sub> O                                                                                                        | 2*ks*fsoh*fpch2oh+2*krohro              | Taraborrelli (2014)                              |
| G4249e   | TrGC   | HCOCH2O2 $\rightarrow$ 0.6 HCHO + 0.6 CO + 0.6 HO <sub>2</sub> + 0.2 GLYOX + 0.2 HOCH <sub>2</sub> CHO                                                                                      | 2.00E-12*R02                            | Taraborrelli (2014)                              |
| G4250e   | TrGC   | HCOCH2O2 + HO <sub>2</sub> $\rightarrow$ 0.85 HOOCH2CHO + 0.15 HCHO + 0.15 CO + 0.15 HO <sub>2</sub> + 0.15 OH                                                                              | KR02H02*0.387                           | Taraborrelli (2014)                              |
| G4251e   | TrGC   | HCOCH2O2 + NO $\rightarrow$ NO <sub>2</sub> + HCHO + CO + HO <sub>2</sub>                                                                                                                   | KR02N0                                  | Taraborrelli (2014)                              |
| G4252e   | TrGC   | HCOCH2O2 + NO <sub>3</sub> $\rightarrow$ HCHO + CO + HO <sub>2</sub> + NO <sub>2</sub>                                                                                                      | KR02N03                                 | Taraborrelli (2014)                              |

Table 1: Gas phase reactions (... continued)

| #        | labels | reaction                                                                                                                                                                                                                                                                                                                                                                                                                                                                                           | rate coefficient                                                                                                | reference                                  |
|----------|--------|----------------------------------------------------------------------------------------------------------------------------------------------------------------------------------------------------------------------------------------------------------------------------------------------------------------------------------------------------------------------------------------------------------------------------------------------------------------------------------------------------|-----------------------------------------------------------------------------------------------------------------|--------------------------------------------|
| G4253e   | TrGC   | $\text{HOOCH}_2\text{CHO} + \text{OH} \rightarrow .71 \text{ OH} + .31 \text{ HCHO} + .31 \text{ CO} + .40 \text{ GLYOX} + .29 \text{ HCOCH}_2\text{O}_2$                                                                                                                                                                                                                                                                                                                                          | $0.6 \cdot k_{\text{CH300H\_OH}} + k_{\text{sfsooh}} \cdot f_{\text{cho}} + .8 \cdot 8.E-12$                    | Taraborrelli (2014)                        |
| G4254e   | TrGNC  | $\text{HOOCH}_2\text{CHO} + \text{NO}_3 \rightarrow \text{OH} + \text{HCHO} + \text{CO} + \text{HNO}_3$                                                                                                                                                                                                                                                                                                                                                                                            | KN03AL                                                                                                          | Rickard and Pascoe (2009)                  |
| G4257e   | TrGC   | $\text{NO}_3\text{CH}_2\text{CHO} + \text{OH} \rightarrow \text{HCHO} + \text{CO}_2 + \text{NO}_2 + \text{H}_2\text{O}$                                                                                                                                                                                                                                                                                                                                                                            | $1.E-11$                                                                                                        | Paulot et al. (2009a), Taraborrelli (2014) |
| G4258e   | TrGNC  | $\text{HOOCH}_2\text{CO}_3 + \text{NO} \rightarrow \text{NO}_2 + \text{OH} + \text{HCHO} + \text{CO}_2$                                                                                                                                                                                                                                                                                                                                                                                            | KAPNO                                                                                                           | Taraborrelli (2014)                        |
| G4259e   | TrGNC  | $\text{HOOCH}_2\text{CO}_3 + \text{NO}_3 \rightarrow \text{NO}_2 + \text{OH} + \text{HCHO} + \text{CO}_2$                                                                                                                                                                                                                                                                                                                                                                                          | KR02NO3*1.60                                                                                                    | Taraborrelli (2014)                        |
| G4260e   | TrGC   | $\text{HOOCH}_2\text{CO}_3 + \text{HO}_2 \rightarrow 2 \text{ OH} + \text{HCHO} + \text{CO}_2$                                                                                                                                                                                                                                                                                                                                                                                                     | KAPH02*rc03_oh                                                                                                  | Taraborrelli (2014)                        |
| G4260et2 | TrGC   | $\text{HOOCH}_2\text{CO}_3 + \text{HO}_2 \rightarrow \text{HOOCH}_2\text{CO}_3\text{H}$                                                                                                                                                                                                                                                                                                                                                                                                            | KAPH02*rc03_ooh                                                                                                 | Taraborrelli (2014)*                       |
| G4260et3 | TrGC   | $\text{HOOCH}_2\text{CO}_3 + \text{HO}_2 \rightarrow \text{HOOCH}_2\text{CO}_2\text{H} + \text{O}_3$                                                                                                                                                                                                                                                                                                                                                                                               | KAPH02*rc03_o3                                                                                                  | Taraborrelli (2014)*                       |
| G4261e   | TrGC   | $\text{HOOCH}_2\text{CO}_3 \rightarrow .7 \text{ OH} + .7 \text{ HCHO} + .7 \text{ CO}_2 + .3 \text{ HOOCH}_2\text{CO}_2\text{H}$                                                                                                                                                                                                                                                                                                                                                                  | $1.00E-11 \cdot R02$                                                                                            | Taraborrelli (2014)                        |
| G4262e   | TrGC   | $\text{HOOCH}_2\text{CO}_3\text{H} + \text{OH} \rightarrow \text{HOOCH}_2\text{CO}_3 + \text{H}_2\text{O}$                                                                                                                                                                                                                                                                                                                                                                                         | $2 \cdot 0.6 \cdot k_{\text{CH300H\_OH}}$                                                                       | Taraborrelli (2014)                        |
| G4263e   | TrGC   | $\text{HOOCH}_2\text{CO}_3\text{H} + \text{OH} \rightarrow \text{HCOCO}_3\text{H} + \text{OH} + \text{H}_2\text{O}$                                                                                                                                                                                                                                                                                                                                                                                | $k_{\text{sfsooh}} \cdot f_{\text{co2h}}$                                                                       | Taraborrelli (2014)                        |
| G4265e   | TrGC   | $\text{HOOCH}_2\text{CO}_2\text{H} + \text{OH} \rightarrow \text{HCOCO}_2\text{H} + \text{OH} + \text{H}_2\text{O}$                                                                                                                                                                                                                                                                                                                                                                                | $k_{\text{sfsooh}} \cdot f_{\text{co2h}} + k_{\text{co2h}}$                                                     | Taraborrelli (2014)                        |
| G4266e   | TrGC   | $\text{CH}_2\text{CO} + \text{OH} \rightarrow .6 \text{ HCHO} + .6 \text{ HO}_2 + .6 \text{ CO} + .4 \text{ HOOCH}_2\text{CO}_2\text{H}$                                                                                                                                                                                                                                                                                                                                                           | $2.8E-12 \cdot \exp(510./\text{temp})$                                                                          | Baulch et al. (2005), Taraborrelli (2014)* |
| G4267e   | TrGC   | $\text{CH}_3\text{CHOHOOH} + \text{OH} \rightarrow \text{CH}_3\text{COOH} + \text{OH}$                                                                                                                                                                                                                                                                                                                                                                                                             | $k_{\text{tftooh}} \cdot f_{\text{ftoh}} + k_{\text{rohro}}$                                                    | Taraborrelli (2014)                        |
| G4268e   | TrGC   | $\text{CH}_3\text{CHOHOOH} + \text{OH} \rightarrow \text{CH}_3\text{CHOHO}_2$                                                                                                                                                                                                                                                                                                                                                                                                                      | $0.6 \cdot k_{\text{CH300H\_OH}}$                                                                               | Taraborrelli (2014)                        |
| G4269e   | TrGC   | $\text{CH}_3\text{CHOHO}_2 \rightarrow \text{CH}_3\text{CHO} + \text{HO}_2$                                                                                                                                                                                                                                                                                                                                                                                                                        | $3.46E12 \cdot \exp(-12500./(1.98 \cdot \text{temp}))$                                                          | Hermans et al. (2005), Taraborrelli (2014) |
| G4270e   | TrGC   | $\text{CH}_3\text{CHO} + \text{HO}_2 \rightarrow \text{CH}_3\text{CHOHO}_2$                                                                                                                                                                                                                                                                                                                                                                                                                        | $3.46E12 \cdot \exp(-12500./(1.98 \cdot \text{temp})) / (6.34E26 \cdot \exp(-14700./(1.98 \cdot \text{temp})))$ | Hermans et al. (2005), Taraborrelli (2014) |
| G4271e   | TrGC   | $\text{CH}_3\text{CHOHO}_2 + \text{HO}_2 \rightarrow .5 \text{ CH}_3\text{CHOHOOH} + .3 \text{ CH}_3\text{COOH} + .2 \text{ CH}_3\text{O}_2 + .2 \text{ HCOOH} + .2 \text{ OH}$                                                                                                                                                                                                                                                                                                                    | $5.6E-15 \cdot \exp(2300./\text{temp})$                                                                         | Taraborrelli (2014)                        |
| G4272e   | TrGC   | $\text{CH}_3\text{CHOHO}_2 \rightarrow \text{CH}_3\text{O}_2 + \text{HCOOH} + \text{OH}$                                                                                                                                                                                                                                                                                                                                                                                                           | $1.4E-12 \cdot R02$                                                                                             | Taraborrelli (2014)                        |
| G4273e   | TrGC   | $\text{CH}_3\text{CHOHO}_2 + \text{NO} \rightarrow \text{CH}_3\text{O}_2 + \text{HCOOH} + \text{OH} + \text{NO}_2$                                                                                                                                                                                                                                                                                                                                                                                 | KR02NO                                                                                                          | Taraborrelli (2014)                        |
| G4300    | TrGC   | $\text{C}_3\text{H}_8 + \text{OH} \rightarrow .736 \text{ iC}_3\text{H}_7\text{O}_2 + .264 \text{ C}_2\text{H}_5\text{O}_2 + .264 \text{ CO}_2 + .264 \text{ HO}_2 + \text{H}_2\text{O}$                                                                                                                                                                                                                                                                                                           | $1.55E-17 \cdot \text{temp} \cdot \text{temp} \cdot \exp(-61./\text{temp})$                                     | Rickard and Pascoe (2009)*                 |
| G4301et2 | TrGC   | $\text{C}_3\text{H}_6 + \text{O}_3 \rightarrow .0855 \text{ CH}_3\text{CHOHOOH} + .4389 \text{ CH}_3\text{CHO} + .4389 \text{ H}_2\text{O}_2 + .0456 \text{ CH}_3\text{COOH} + .285 \text{ HCOCH}_2\text{O}_2 + .0855 \text{ CH}_4 + .0855 \text{ CO}_2 + .0342 \text{ CH}_2\text{CO} + .0513 \text{ CH}_3\text{OH} + .0228 \text{ CH}_3\text{C(O)OO} + .57 \text{ HCHO} + .2709 \text{ CO} + .0688 \text{ HO}_2 + .1591 \text{ HOCH}_2\text{OOH} + .43 \text{ CH}_3\text{CHO} + .3766 \text{ OH}$ | $6.5E-15 \cdot \exp(-1900./\text{temp})$                                                                        | Taraborrelli (2014)                        |

Table 1: Gas phase reactions (... continued)

| #       | labels | reaction                                                                                                                                                                       | rate coefficient                                                                      | reference                                 |
|---------|--------|--------------------------------------------------------------------------------------------------------------------------------------------------------------------------------|---------------------------------------------------------------------------------------|-------------------------------------------|
| G4302   | TrGC   | $\text{C}_3\text{H}_6 + \text{OH} \rightarrow \text{HYPROPO2}$                                                                                                                 | $\text{k\_3rd}(\text{temp}, \text{cair}, 8.\text{E-}27, 3.5, 3.\text{E-}11, 0., 0.5)$ | Atkinson et al. (1999)                    |
| G4303   | TrGNC  | $\text{C}_3\text{H}_6 + \text{NO}_3 \rightarrow \text{PRONO3BO2}$                                                                                                              | $4.6\text{E-}13 * \text{EXP}(-1155./\text{temp})$                                     | Atkinson et al. (1999)                    |
| G4304   | TrGC   | $\text{iC}_3\text{H}_7\text{O}_2 + \text{HO}_2 \rightarrow \text{iC}_3\text{H}_7\text{OOH}$                                                                                    | $1.9\text{E-}13 * \text{EXP}(1300./\text{temp})$                                      | Atkinson (1997)*                          |
| G4305   | TrGNC  | $\text{iC}_3\text{H}_7\text{O}_2 + \text{NO} \rightarrow .96 \text{CH}_3\text{COCH}_3 + .96 \text{HO}_2 + .96 \text{NO}_2 + .04 \text{iC}_3\text{H}_7\text{ONO}_2$             | $2.7\text{E-}12 * \text{EXP}(360./\text{temp})$                                       | Atkinson et al. (1999)                    |
| G4306   | TrGC   | $\text{iC}_3\text{H}_7\text{O}_2 \rightarrow \text{CH}_3\text{COCH}_3 + .8 \text{HO}_2$                                                                                        | $4.\text{E-}14 * \text{R02}$                                                          | Rickard and Pascoe (2009)*                |
| G4307   | TrGC   | $\text{iC}_3\text{H}_7\text{OOH} + \text{OH} \rightarrow .27 \text{iC}_3\text{H}_7\text{O}_2 + .73 \text{CH}_3\text{COCH}_3 + .73 \text{OH} + \text{H}_2\text{O}$              | $1.66\text{E-}11 + 0.6 * \text{k\_CH300H\_OH}$                                        | Rickard and Pascoe (2009)*                |
| G4311   | TrGC   | $\text{CH}_3\text{COCH}_3 + \text{OH} \rightarrow \text{CH}_3\text{COCH}_2\text{O}_2 + \text{H}_2\text{O}$                                                                     | $1.33\text{E-}13 + 3.82\text{E-}11 * \text{EXP}(-2000./\text{temp})$                  | Sander et al. (2003)                      |
| G4312e  | TrGC   | $\text{CH}_3\text{COCH}_2\text{O}_2 + \text{HO}_2 \rightarrow .15 \text{OH} + .15 \text{CH}_3\text{C(O)OO} + .15 \text{HCHO} + .85 \text{CH}_3\text{COCH}_2\text{O}_2\text{H}$ | $8.6\text{E-}13 * \text{EXP}(700./\text{temp})$                                       | Taraborrelli (2014)                       |
| G4313   | TrGNC  | $\text{CH}_3\text{COCH}_2\text{O}_2 + \text{NO} \rightarrow \text{CH}_3\text{C(O)OO} + \text{HCHO} + \text{NO}_2$                                                              | $2.9\text{E-}12 * \text{EXP}(300./\text{temp})$                                       | Sander et al. (2003)                      |
| G4314   | TrGC   | $\text{CH}_3\text{COCH}_2\text{O}_2 \rightarrow .6 \text{CH}_3\text{C(O)OO} + .6 \text{HCHO} + .2 \text{MGLYOX} + .2 \text{CH}_3\text{COCH}_2\text{OH}$                        | $7.5\text{E-}13 * \text{EXP}(500./\text{temp}) * 2. * \text{R02}$                     | Tyndall et al. (2001)                     |
| G4321   | TrGNC  | $\text{CH}_3\text{COCH}_2\text{O}_2 + \text{NO}_3 \rightarrow \text{CH}_3\text{C(O)OO} + \text{HCHO} + \text{NO}_2$                                                            | $\text{KR02N03}$                                                                      | Rickard and Pascoe (2009)                 |
| G4315a  | TrGC   | $\text{CH}_3\text{COCH}_2\text{O}_2\text{H} + \text{OH} \rightarrow \text{CH}_3\text{COCH}_2\text{O}_2 + \text{H}_2\text{O}$                                                   | $0.6 * \text{k\_CH300H\_OH}$                                                          | Rickard and Pascoe (2009)*                |
| G4315b  | TrGC   | $\text{CH}_3\text{COCH}_2\text{O}_2\text{H} + \text{OH} \rightarrow \text{MGLYOX} + \text{OH} + \text{H}_2\text{O}$                                                            | $\text{ks*fsooh*fco}$                                                                 | Taraborrelli (2014)                       |
| G4316e  | TrGC   | $\text{CH}_3\text{COCH}_2\text{OH} + \text{OH} \rightarrow \text{CH}_3\text{COCHOH} + \text{H}_2\text{O}$                                                                      | $1.60\text{E-}12 * \text{EXP}(305./\text{temp})$                                      | Taraborrelli (2014)                       |
| G4336ea | TrGC   | $\text{CH}_3\text{COCHOH} \rightarrow \text{MGLYOX} + \text{HO}_2$                                                                                                             | $0.8485$                                                                              | Taraborrelli (2014)                       |
| G4317e  | TrGC   | $\text{MGLYOX} + \text{OH} \rightarrow .4 \text{CH}_3\text{O}_2 + .6 \text{CH}_3\text{C(O)OO} + 1.4 \text{CO}$                                                                 | $1.9\text{E-}12 * \text{EXP}(575./\text{temp})$                                       | Baeza-Romero et al. (2007), IU-PAC (2013) |
| G4331   | TrGNC  | $\text{MGLYOX} + \text{NO}_3 \rightarrow \text{CH}_3\text{C(O)OO} + \text{CO} + \text{HNO}_3$                                                                                  | $\text{KN03AL} * 2.4$                                                                 | Rickard and Pascoe (2009)                 |
| G4320   | TrGNC  | $\text{iC}_3\text{H}_7\text{ONO}_2 + \text{OH} \rightarrow \text{CH}_3\text{COCH}_3 + \text{NO}_2$                                                                             | $6.2\text{E-}13 * \text{EXP}(-230./\text{temp})$                                      | Atkinson et al. (1999)                    |
| G4322   | TrGC   | $\text{HYPROPO2} \rightarrow \text{CH}_3\text{CHO} + \text{HCHO} + \text{HO}_2$                                                                                                | $8.80\text{E-}13 * \text{R02}$                                                        | Rickard and Pascoe (2009)                 |
| G4323   | TrGC   | $\text{HYPROPO2} + \text{HO}_2 \rightarrow \text{HYPROPO2H}$                                                                                                                   | $\text{KR02H02} * 0.520$                                                              | Rickard and Pascoe (2009)                 |
| G4324   | TrGNC  | $\text{HYPROPO2} + \text{NO} \rightarrow \text{CH}_3\text{CHO} + \text{HCHO} + \text{HO}_2 + \text{NO}_2$                                                                      | $\text{KR02N0}$                                                                       | Rickard and Pascoe (2009)                 |
| G4325   | TrGNC  | $\text{HYPROPO2} + \text{NO}_3 \rightarrow \text{CH}_3\text{CHO} + \text{HCHO} + \text{HO}_2 + \text{NO}_2$                                                                    | $\text{KR02N03}$                                                                      | Rickard and Pascoe (2009)                 |
| G4326a  | TrGC   | $\text{HYPROPO2H} + \text{OH} \rightarrow \text{HYPROPO2}$                                                                                                                     | $0.6 * \text{k\_CH300H\_OH}$                                                          | Rickard and Pascoe (2009)                 |
| G4326b  | TrGC   | $\text{HYPROPO2H} + \text{OH} \rightarrow \text{CH}_3\text{COCH}_2\text{OH} + \text{OH}$                                                                                       | $\text{ks*fsoh*fpch2oh} + \text{kt*fsooh*fpch2oh}$                                    | Taraborrelli (2014)                       |
| G4327   | TrGNC  | $\text{PRONO3BO2} + \text{HO}_2 \rightarrow \text{PR2O2HNO3}$                                                                                                                  | $\text{KR02H02} * 0.520$                                                              | Rickard and Pascoe (2009)                 |
| G4328   | TrGNC  | $\text{PRONO3BO2} + \text{NO} \rightarrow \text{NOA} + \text{HO}_2 + \text{NO}_2$                                                                                              | $\text{KR02N0}$                                                                       | Rickard and Pascoe (2009)                 |
| G4329   | TrGNC  | $\text{PRONO3BO2} + \text{NO}_3 \rightarrow \text{NOA} + \text{HO}_2 + \text{NO}_2$                                                                                            | $\text{KR02N03}$                                                                      | Rickard and Pascoe (2009)                 |
| G4330a  | TrGNC  | $\text{PR2O2HNO3} + \text{OH} \rightarrow \text{PRONO3BO2}$                                                                                                                    | $1.90\text{E-}12 * \text{EXP}(190./\text{temp})$                                      | Rickard and Pascoe (2009)                 |
| G4330b  | TrGNC  | $\text{PR2O2HNO3} + \text{OH} \rightarrow \text{NOA} + \text{OH}$                                                                                                              | $\text{kt*fsooh*fch2ono2}$                                                            | Rickard and Pascoe (2009)                 |

Table 1: Gas phase reactions (... continued)

| #      | labels | reaction                                                                                                                                                                                                            | rate coefficient                                                 | reference                                      |
|--------|--------|---------------------------------------------------------------------------------------------------------------------------------------------------------------------------------------------------------------------|------------------------------------------------------------------|------------------------------------------------|
| G4332  | TrGNC  | $\text{NOA} + \text{OH} \rightarrow \text{MGLYOX} + \text{NO}_2$                                                                                                                                                    | $\text{ks*fco*fono2+kp*fco}$                                     | Taraborrelli (2014)                            |
| G4333e | TrGC   | $\text{HOCH}_2\text{COCHO} + \text{OH} \rightarrow .8609 \text{HOCH}_2\text{CO} + .8609 \text{CO} + .1391 \text{HCOCOCHO} + .1391 \text{HO}_2$                                                                      | $1.9\text{E-}12*\text{EXP}(575./\text{temp})+\text{ks*fsoh*fco}$ | Taraborrelli (2014)                            |
| G4334e | TrGNC  | $\text{HOCH}_2\text{COCHO} + \text{NO}_3 \rightarrow \text{HOCH}_2\text{CO} + \text{CO} + \text{HNO}_3$                                                                                                             | $\text{KN03AL*2.4}$                                              | Taraborrelli (2014)                            |
| G4337e | TrGC   | $\text{CH}_3\text{COCO}_2\text{H} + \text{OH} \rightarrow \text{CH}_3\text{C(O)OO} + \text{H}_2\text{O} + \text{CO}_2$                                                                                              | $4.9\text{E-}14*\text{EXP}(276./\text{temp})$                    | Mellouki and Mu (2003), Taraborrelli (2014)    |
| G4338e | TrGC   | $\text{HOCH}_2\text{COCH}_2\text{O}_2 \rightarrow \text{HCHO} + \text{HOCH}_2\text{CO}$                                                                                                                             | $\text{R02*2.0E-}12$                                             | Taraborrelli (2014)                            |
| G4339e | TrGC   | $\text{HOCH}_2\text{COCH}_2\text{O}_2 + \text{HO}_2 \rightarrow .15 \text{HCHO} + .15 \text{HOCH}_2\text{CO} + .15 \text{OH} + .85 \text{HOCH}_2\text{COCH}_2\text{OOH}$                                            | $\text{KR02H02*0.520}$                                           | Taraborrelli (2014)                            |
| G4340e | TrGC   | $\text{HOCH}_2\text{COCH}_2\text{O}_2 + \text{NO} \rightarrow \text{HCHO} + \text{HOCH}_2\text{CO} + \text{NO}_2$                                                                                                   | $\text{KR02N0}$                                                  | Taraborrelli (2014)                            |
| G4341e | TrGC   | $\text{HOCH}_2\text{COCH}_2\text{OOH} + \text{OH} \rightarrow \text{HOCH}_2\text{COCHO} + \text{OH}$                                                                                                                | $\text{ks*fsooh*fco}$                                            | Taraborrelli (2014)                            |
| G4342e | TrGC   | $\text{HOCH}_2\text{COCH}_2\text{OOH} + \text{OH} \rightarrow \text{HOCH}_2\text{COCH}_2\text{O}_2$                                                                                                                 | $.6*k_{\text{CH300H\_OH}}$                                       | Taraborrelli (2014)                            |
| G4343e | TrGC   | $\text{HOCH}_2\text{COCH}_2\text{OOH} + \text{OH} \rightarrow \text{HCOCOCH}_2\text{OOH} + \text{HO}_2$                                                                                                             | $0.9295*1.60\text{E-}12*\text{EXP}(305./\text{temp})$            | Taraborrelli (2014)*                           |
| G4344e | TrGC   | $\text{HCOCOCH}_2\text{O}_2 \rightarrow 0.6 \text{HCOCO}_3\text{A} + 0.6 \text{HCHO} + 0.2 \text{HCOCOCHO} + 0.2 \text{HOCH}_2\text{COCHO}$                                                                         | $2.00\text{E-}12*\text{R02}$                                     | Taraborrelli (2014)                            |
| G4345e | TrGC   | $\text{HCOCOCH}_2\text{O}_2 + \text{NO} \rightarrow \text{HCOCO}_3\text{A} + \text{HCHO} + \text{NO}_2$                                                                                                             | $\text{KR02N0}$                                                  | Taraborrelli (2014)                            |
| G4346e | TrGC   | $\text{HCOCOCH}_2\text{O}_2 + \text{HO}_2 \rightarrow 0.85 \text{HCOCOCH}_2\text{OOH} + 0.15 \text{HCOCO}_3\text{A} + 0.15 \text{HCHO} + 0.15 \text{OH}$                                                            | $\text{KR02H02*0.520}$                                           | Taraborrelli (2014)                            |
| G4347e | TrGC   | $\text{HCOCOCH}_2\text{O}_2 + \text{NO}_3 \rightarrow \text{HCOCO}_3\text{A} + \text{HCHO} + \text{NO}_2$                                                                                                           | $\text{KR02N03}$                                                 | Taraborrelli (2014)                            |
| G4348e | TrGC   | $\text{HCOCOCH}_2\text{OOH} + \text{OH} \rightarrow \text{HOOCH}_2\text{CO}_3 + \text{CO} + \text{H}_2\text{O}$                                                                                                     | $\text{kt*fco*fco}$                                              | Taraborrelli (2014)                            |
| G4349e | TrGC   | $\text{HCOCOCH}_2\text{OOH} + \text{OH} \rightarrow \text{HCOCOCHO} + \text{OH} + \text{H}_2\text{O}$                                                                                                               | $\text{ks*fsooh*fco}$                                            | Taraborrelli (2014)                            |
| G4350e | TrGC   | $\text{HCOCOCH}_2\text{OOH} + \text{OH} \rightarrow \text{HCOCOCH}_2\text{O}_2 + \text{H}_2\text{O}$                                                                                                                | $0.6*k_{\text{CH300H\_OH}}$                                      | Taraborrelli (2014)                            |
| G4351e | TrGC   | $\text{HCOCOCH}_2\text{OOH} + \text{NO}_3 \rightarrow \text{HOOCH}_2\text{CO}_3 + \text{CO} + \text{HNO}_3$                                                                                                         | $\text{KN03AL*2.4}$                                              | Taraborrelli (2014)                            |
| G4352e | TrGC   | $\text{HCOCOCHO} + \text{OH} \rightarrow \text{HCOCO}_3\text{A} + \text{CO}$                                                                                                                                        | $2*kt*fco*fo$                                                    | Taraborrelli (2014)                            |
| G4353e | TrGC   | $\text{CH}_3\text{CHCO} + \text{OH} \rightarrow .72 \text{CO} + .72 \text{CH}_3\text{CHO} + .72 \text{HO}_2 + .21 \text{CH}_3\text{COCO}_2\text{H} + .07 \text{CH}_3\text{CHO} + .07 \text{HO}_2 + .07 \text{CO}_2$ | $7.6\text{E-}11$                                                 | Hatakeyama et al. (1985), Taraborrelli (2014)* |
| G4354e | TrGC   | $\text{HCOCCH}_3\text{CO} + \text{OH} \rightarrow \text{CO} + \text{CH}_3\text{COCHOH}$                                                                                                                             | $1\text{E-}10*\text{acho}$                                       | Hatakeyama et al. (1985), Taraborrelli (2014)* |
| G4355e | TrGC   | $\text{CH}_3\text{COCHCO} + \text{OH} \rightarrow \text{CO} + \text{CH}_3\text{COCHOH}$                                                                                                                             | $7.6\text{E-}11*\text{acoch3}$                                   | Hatakeyama et al. (1985), Taraborrelli (2014)* |
| G4400  | TrGC   | $\text{nC}_4\text{H}_{10} + \text{OH} \rightarrow \text{LC}_4\text{H}_9\text{O}_2 + \text{H}_2\text{O}$                                                                                                             | $1.81\text{E-}17*\text{temp*temp*EXP}(114./\text{temp})$         | Atkinson (2003)*                               |
| G4401  | TrGC   | $\text{LC}_4\text{H}_9\text{O}_2 \rightarrow 0.254 \text{CO}_2 + 0.5552 \text{MEK} + 0.5552 \text{HO}_2 + 0.3178 \text{CH}_3\text{CHO} + 0.4448 \text{C}_2\text{H}_5\text{O}_2$                                     | $2.5\text{E-}13*\text{R02}$                                      | Rickard and Pascoe (2009)*                     |
| G4402  | TrGC   | $\text{LC}_4\text{H}_9\text{O}_2 + \text{HO}_2 \rightarrow \text{LC}_4\text{H}_9\text{OOH}$                                                                                                                         | $\text{KR02H02*0.625}$                                           | Rickard and Pascoe (2009)                      |



Table 1: Gas phase reactions (... continued)

| #       | labels | reaction                                                                                                                                                                                                                                                                                                                                                                             | rate coefficient                  | reference                                   |
|---------|--------|--------------------------------------------------------------------------------------------------------------------------------------------------------------------------------------------------------------------------------------------------------------------------------------------------------------------------------------------------------------------------------------|-----------------------------------|---------------------------------------------|
| G4403   | TrGNC  | LC <sub>4</sub> H <sub>9</sub> O <sub>2</sub> + NO → 0.9172 NO <sub>2</sub> + 0.233 CO <sub>2</sub> + 0.5092 MEK + 0.5092 HO <sub>2</sub> + 0.2915 CH <sub>3</sub> CHO + 0.408 C <sub>2</sub> H <sub>5</sub> O <sub>2</sub> + 0.0828 LC <sub>4</sub> H <sub>9</sub> NO <sub>3</sub>                                                                                                  | KR02NO                            | Rickard and Pascoe (2009)*                  |
| G4404   | TrGC   | LC <sub>4</sub> H <sub>9</sub> OOH + OH → 0.2285796 LC <sub>4</sub> H <sub>9</sub> O <sub>2</sub> + 0.7117253 MEK + 0.1193902 CO <sub>2</sub> + 0.0596951 C <sub>2</sub> H <sub>5</sub> O <sub>2</sub> + 0.7714204 OH + H <sub>2</sub> O                                                                                                                                             | 2.636E-11                         | Rickard and Pascoe (2009)*                  |
| G4405e  | TrGC   | MVK + O <sub>3</sub> → .87 MGLYOX + 0.5481 CO + 0.1392 HO <sub>2</sub> + 0.1392 OH + 0.3219 HOCH <sub>2</sub> OOH + .13 HCHO + 0.04680 OH + 0.04680 CO + 0.07280 CH <sub>3</sub> C(O)OO + .026 CH <sub>3</sub> CHO + .026 CO <sub>2</sub> + .026 HCHO + .026 HO <sub>2</sub> + 0.02402 MGLYOX + 0.02402 H <sub>2</sub> O <sub>2</sub> + 0.007176 CH <sub>3</sub> COCO <sub>2</sub> H | 8.5E-16*EXP(-1520./temp)          | Taraborrelli (2014)                         |
| G4406e  | TrGC   | MVK + OH → LHMVKABO <sub>2</sub>                                                                                                                                                                                                                                                                                                                                                     | 2.6E-12*EXP(610./temp)            | Taraborrelli (2014)*                        |
| G4413   | TrGC   | MEK + OH → LMEKO <sub>2</sub> + H <sub>2</sub> O                                                                                                                                                                                                                                                                                                                                     | 3.24E-18*temp*temp*EXP(414./temp) | Rickard and Pascoe (2009)*                  |
| G4414ea | TrGC   | LMEKO <sub>2</sub> + HO <sub>2</sub> → LMEKOOH                                                                                                                                                                                                                                                                                                                                       | KR02H02*0.625*rcoch2o2_ooh        | Taraborrelli (2014)                         |
| G4414eb | TrGC   | LMEKO <sub>2</sub> + HO <sub>2</sub> → 0.538 HCHO + 0.538 CO <sub>2</sub> + 0.459 HOCH <sub>2</sub> CH <sub>2</sub> O <sub>2</sub> + 0.079 C <sub>2</sub> H <sub>5</sub> O <sub>2</sub> + 0.462 CH <sub>3</sub> C(O)OO + 0.462 CH <sub>3</sub> CHO + OH                                                                                                                              | KR02H02*0.625*rcoch2o2_oh         | Taraborrelli (2014)                         |
| G4415   | TrGNC  | LMEKO <sub>2</sub> + NO → 0.538 HCHO + 0.538 CO <sub>2</sub> + 0.459 HOCH <sub>2</sub> CH <sub>2</sub> O <sub>2</sub> + 0.079 C <sub>2</sub> H <sub>5</sub> O <sub>2</sub> + 0.462 CH <sub>3</sub> C(O)OO + 0.462 CH <sub>3</sub> CHO + NO <sub>2</sub>                                                                                                                              | KR02NO                            | Rickard and Pascoe (2009)*                  |
| G4416   | TrGC   | LMEKOOH + OH → 0.40851 CH <sub>3</sub> COCH <sub>2</sub> O <sub>2</sub> + 0.350196 BIACET + 0.807212 OH + 0.048506 C <sub>2</sub> H <sub>5</sub> O <sub>2</sub> + 0.505522 CO <sub>2</sub> + 0.192788 LMEKO <sub>2</sub> + H <sub>2</sub> O                                                                                                                                          | 3.786E-11                         | Rickard and Pascoe (2009)*                  |
| G4417   | TrGNC  | LC <sub>4</sub> H <sub>9</sub> NO <sub>3</sub> + OH → 0.91423 MEK + 0.08577 C <sub>2</sub> H <sub>5</sub> O <sub>2</sub> + 0.17154 CO <sub>2</sub> + NO <sub>2</sub> + H <sub>2</sub> O                                                                                                                                                                                              | 9.598E-13                         | Rickard and Pascoe (2009)*                  |
| G4418   | TrGNC  | MPAN + OH → CH <sub>3</sub> COCH <sub>2</sub> OH + CO + NO <sub>2</sub>                                                                                                                                                                                                                                                                                                              | 3.2E-11                           | Orlando et al. (2002)                       |
| G4419   | TrGNC  | MPAN → MACO <sub>3</sub> + NO <sub>2</sub>                                                                                                                                                                                                                                                                                                                                           | k_PAN_M                           | see note                                    |
| G4420   | TrGC   | LMEKO <sub>2</sub> → 0.538 HCHO + 0.538 CO <sub>2</sub> + 0.459 HOCH <sub>2</sub> CH <sub>2</sub> O <sub>2</sub> + 0.079 C <sub>2</sub> H <sub>5</sub> O <sub>2</sub> + 0.462 CH <sub>3</sub> C(O)OO + 0.462 CH <sub>3</sub> CHO                                                                                                                                                     | 1.483E-12*R02                     | Rickard and Pascoe (2009)*                  |
| G4421e  | TrGC   | MACR + OH → .45 MACO <sub>3</sub> + .55 MACRO <sub>2</sub>                                                                                                                                                                                                                                                                                                                           | 8.E-12*EXP(380./temp)             | Orlando et al. (1999b), Taraborrelli (2014) |
| G4422e  | TrGC   | MACR + O <sub>3</sub> → 0.5481 CO + 0.1392 HO <sub>2</sub> + 0.1392 OH + 0.3219 HOCH <sub>2</sub> OOH + .87 MGLYOX + .13 HCHO + .13 OH + .065 HCOCOCH <sub>2</sub> O <sub>2</sub> + .065 CO + .065 CH <sub>3</sub> C(O)OO                                                                                                                                                            | 1.36E-15*EXP(-2112./temp)         | Taraborrelli (2014)                         |

Table 1: Gas phase reactions (... continued)

| #        | labels | reaction                                                                                                                                            | rate coefficient                     | reference                 |
|----------|--------|-----------------------------------------------------------------------------------------------------------------------------------------------------|--------------------------------------|---------------------------|
| G4423    | TrGNC  | MACR + NO <sub>3</sub> → MACO3 + HNO <sub>3</sub>                                                                                                   | KN03AL*2.0                           | Rickard and Pascoe (2009) |
| G4424e   | TrGC   | MACO3 → .7 MACO2 + .3 MACO2H                                                                                                                        | 1.00E-11*R02                         | Taraborrelli (2014)       |
| G4425e   | TrGC   | MACO3 + HO <sub>2</sub> → MACO2 + OH                                                                                                                | KAPH02*rco3_oh                       | Taraborrelli (2014)       |
| G4425et2 | TrGC   | MACO3 + HO <sub>2</sub> → MACO3H                                                                                                                    | KAPH02*rco3_ooh                      | Taraborrelli (2014)       |
| G4425et3 | TrGC   | MACO3 + HO <sub>2</sub> → MACO2H + O <sub>3</sub>                                                                                                   | KAPH02*rco3_o3                       | Taraborrelli (2014)       |
| G4426e   | TrGNC  | MACO3 + NO → MACO2 + NO <sub>2</sub>                                                                                                                | 8.70E-12*EXP(290./temp)              | Taraborrelli (2014)       |
| G4427    | TrGNC  | MACO3 + NO <sub>2</sub> → MPAN                                                                                                                      | k_CH3C03_N02                         | Rickard and Pascoe (2009) |
| G4428e   | TrGNC  | MACO3 + NO <sub>3</sub> → MACO2 + NO <sub>2</sub>                                                                                                   | KR02N03*1.60                         | Taraborrelli (2014)       |
| G4429e   | TrGC   | MACRO2 → .7 CH <sub>3</sub> COCH <sub>2</sub> OH + .7 HCHO + .7 HO <sub>2</sub> + .3 MACROH                                                         | 9.20E-14*R02                         | Taraborrelli (2014)       |
| G4430e   | TrGC   | MACRO2 + HO <sub>2</sub> → MACRO + OH                                                                                                               | KR02H02*0.625*rcoch2o2_oh            | Taraborrelli (2014)       |
| G4430et2 | TrGC   | MACRO2 + HO <sub>2</sub> → MACROOH                                                                                                                  | KR02H02*0.625*rcoch2o2_ooh           | Taraborrelli (2014)       |
| G4431e   | TrGNC  | MACRO2 + NO → .85 MACRO + .85 NO <sub>2</sub> + .15 MACRN                                                                                           | KR02N0                               | Taraborrelli (2014)       |
| G4432e   | TrGNC  | MACRO2 + NO <sub>3</sub> → MACRO + NO <sub>2</sub>                                                                                                  | KR02N03                              | Taraborrelli (2014)       |
| G4433ea  | TrGC   | MACROOH + OH → MACRO2                                                                                                                               | 0.6*k_CH300H_OH                      | Taraborrelli (2014)       |
| G4433eb  | TrGC   | MACROOH + OH → CO + OH + CH <sub>3</sub> COCH <sub>2</sub> OH                                                                                       | kt*fo*ftch2oh*falk                   | Taraborrelli (2014)       |
| G4433ec  | TrGC   | MACROOH + OH → CO + MGLYOX + HO <sub>2</sub>                                                                                                        | ks*fsch*fpch2oh + krohro             | Taraborrelli (2014)       |
| G4434e   | TrGC   | MACROH + OH → CH <sub>3</sub> COCH <sub>2</sub> OH + CO + HO <sub>2</sub>                                                                           | kt*fo*ftch2oh*falk                   | Taraborrelli (2014)       |
| G4434et2 | TrGC   | MACRO → .885 CH <sub>3</sub> COCH <sub>2</sub> OH + .885 CO + .115 MGLYOX + .115 HCHO + HO <sub>2</sub>                                             | KDEC                                 | Taraborrelli (2014)       |
| G4435e   | TrGC   | MACO2H + OH → CH <sub>3</sub> COCH <sub>2</sub> OH + HO <sub>2</sub> + CO <sub>2</sub>                                                              | (kadt+kadp)*aco2h+kco2h              | Taraborrelli (2014)       |
| G4436e   | TrGC   | MACO3H + OH → CH <sub>3</sub> COCH <sub>2</sub> OH + CO <sub>2</sub> + OH                                                                           | 0.6*k_CH300H_OH+(kadt+kadp)*aco2h    | Taraborrelli (2014)       |
| G4437e   | TrGC   | LHMKABO2 → .024 CO2H3CHO + .072 CH3COCHOH + .072 HCHO + .5280 CH <sub>3</sub> C(O)OO + .5280 HOCH <sub>2</sub> CHO + .176 BIACETOH + .2 HO12CO3C4   | 1.014E-12*R02                        | Taraborrelli (2014)*      |
| G4438e   | TrGC   | LHMKABO2 + HO <sub>2</sub> → OH + HOCH <sub>2</sub> CHO + CH <sub>3</sub> C(O)OO                                                                    | KR02H02*0.625*.88*rcoch2o2_oh        | Taraborrelli (2014)       |
| G4438et2 | TrGC   | LHMKABO2 + HO <sub>2</sub> → LHMKABOOH                                                                                                              | KR02H02*0.625*(.12+.88*rcoch2o2_ooh) | Taraborrelli (2014)       |
| G4439ea  | TrGNC  | LHMKABO2 + NO → .12 CH3COCHOH + .88 HOCH <sub>2</sub> CHO + .88 CH <sub>3</sub> C(O)OO + .12 HCHO + NO <sub>2</sub>                                 | KR02N0*(1.-0.11)                     | Taraborrelli (2014)*      |
| G4439eb  | TrGNC  | LHMKABO2 + NO → HMVKNO3                                                                                                                             | KR02N0*0.11                          | Taraborrelli (2014)       |
| G4440e   | TrGNC  | LHMKABO2 + NO <sub>3</sub> → .12 MGLYOX + .88 HOCH <sub>2</sub> CHO + .88 CH <sub>3</sub> C(O)OO + .12 HCHO + .12 HO <sub>2</sub> + NO <sub>2</sub> | KR02N03                              | Taraborrelli (2014)*      |

Table 1: Gas phase reactions (... continued)

| #        | labels | reaction                                                                                                                                                                                                                                                                                                                                                                                                                                               | rate coefficient                                                                                                                                                | reference                 |
|----------|--------|--------------------------------------------------------------------------------------------------------------------------------------------------------------------------------------------------------------------------------------------------------------------------------------------------------------------------------------------------------------------------------------------------------------------------------------------------------|-----------------------------------------------------------------------------------------------------------------------------------------------------------------|---------------------------|
| G4441e   | TrGC   | LHMKABOOH + OH $\rightarrow$ .12 CO <sub>2</sub> H <sub>3</sub> CHO + .88 BIACETOH + OH                                                                                                                                                                                                                                                                                                                                                                | $0.6 \cdot k_{\text{CH300H\_OH}} + .12 \cdot k_{\text{fsooh}} \cdot f_{\text{pch2oh}} + .88 \cdot k_{\text{ftooh}} \cdot f_{\text{pch2oh}} \cdot f_{\text{co}}$ | Taraborrelli (2014)*      |
| G4449e   | TrGC   | CO <sub>2</sub> H <sub>3</sub> CHO + OH $\rightarrow$ CO <sub>2</sub> H <sub>3</sub> CO <sub>3</sub>                                                                                                                                                                                                                                                                                                                                                   | $k_{\text{tfo}} \cdot f_{\text{alk}}$                                                                                                                           | Taraborrelli (2014)       |
| G4449et2 | TrGC   | CO <sub>2</sub> H <sub>3</sub> CHO + OH $\rightarrow$ CH <sub>3</sub> COCOCHO + HO <sub>2</sub> + H <sub>2</sub> O                                                                                                                                                                                                                                                                                                                                     | $k_{\text{tfc}} \cdot f_{\text{toh}} \cdot f_{\text{cho}}$                                                                                                      | Taraborrelli (2014)       |
| G4450    | TrGNC  | CO <sub>2</sub> H <sub>3</sub> CHO + NO <sub>3</sub> $\rightarrow$ CO <sub>2</sub> H <sub>3</sub> CO <sub>3</sub> + HNO <sub>3</sub>                                                                                                                                                                                                                                                                                                                   | KN03AL*4.0                                                                                                                                                      | Rickard and Pascoe (2009) |
| G4451e   | TrGC   | CO <sub>2</sub> H <sub>3</sub> CO <sub>3</sub> $\rightarrow$ CH <sub>3</sub> COCHOH + CO <sub>2</sub>                                                                                                                                                                                                                                                                                                                                                  | 1.00E-11*R02                                                                                                                                                    | Taraborrelli (2014)       |
| G4452e   | TrGC   | CO <sub>2</sub> H <sub>3</sub> CO <sub>3</sub> + HO <sub>2</sub> $\rightarrow$ OH + CH <sub>3</sub> COCHOH + CO <sub>2</sub>                                                                                                                                                                                                                                                                                                                           | KAPH02*rco3_oh                                                                                                                                                  | Taraborrelli (2014)       |
| G4452et2 | TrGC   | CO <sub>2</sub> H <sub>3</sub> CO <sub>3</sub> + HO <sub>2</sub> $\rightarrow$ CO <sub>2</sub> H <sub>3</sub> CO <sub>2</sub> H + O <sub>3</sub>                                                                                                                                                                                                                                                                                                       | KAPH02*rco3_o3                                                                                                                                                  | Taraborrelli (2014)       |
| G4452et3 | TrGC   | CO <sub>2</sub> H <sub>3</sub> CO <sub>3</sub> + HO <sub>2</sub> $\rightarrow$ CO <sub>2</sub> H <sub>3</sub> CO <sub>3</sub> H                                                                                                                                                                                                                                                                                                                        | KAPH02*rco3_ooh                                                                                                                                                 | Taraborrelli (2014)       |
| G4453e   | TrGNC  | CO <sub>2</sub> H <sub>3</sub> CO <sub>3</sub> + NO $\rightarrow$ CH <sub>3</sub> COCHOH + NO <sub>2</sub> + CO <sub>2</sub>                                                                                                                                                                                                                                                                                                                           | KAPNO                                                                                                                                                           | Taraborrelli (2014)       |
| G4454e   | TrGNC  | CO <sub>2</sub> H <sub>3</sub> CO <sub>3</sub> + NO <sub>3</sub> $\rightarrow$ CH <sub>3</sub> COCHOH + NO <sub>2</sub> + CO <sub>2</sub>                                                                                                                                                                                                                                                                                                              | KR02NO3*1.60                                                                                                                                                    | Taraborrelli (2014)       |
| G4455    | TrGC   | CO <sub>2</sub> H <sub>3</sub> CO <sub>3</sub> H + OH $\rightarrow$ 0.5127 CO <sub>2</sub> H <sub>3</sub> CO <sub>3</sub> + 0.4873 CH <sub>3</sub> C(O)OO + 0.4873 CO + 0.4873 CO <sub>2</sub> + 0.4873 OH                                                                                                                                                                                                                                             | $k_{\text{tfc}} \cdot f_{\text{co2h}} \cdot f_{\text{co}} \cdot f_{\text{toh}} + 0.6 \cdot k_{\text{CH300H\_OH}}$                                               | Taraborrelli (2014)*      |
| G4455t2  | TrGC   | CO <sub>2</sub> H <sub>3</sub> CO <sub>2</sub> H + OH $\rightarrow$ CH <sub>3</sub> COCOCO <sub>2</sub> H + HO <sub>2</sub>                                                                                                                                                                                                                                                                                                                            | $k_{\text{tfc}} \cdot f_{\text{co2h}} \cdot f_{\text{co}} \cdot f_{\text{toh}} + k_{\text{co2h}}$                                                               | Taraborrelli (2014)       |
| G4456a   | TrGC   | HO <sub>12</sub> CO <sub>3</sub> C <sub>4</sub> + OH $\rightarrow$ BIACETOH + HO <sub>2</sub>                                                                                                                                                                                                                                                                                                                                                          | $k_{\text{tftoh}} \cdot f_{\text{alk}} \cdot f_{\text{co}}$                                                                                                     | Taraborrelli (2014)       |
| G4456b   | TrGC   | HO <sub>12</sub> CO <sub>3</sub> C <sub>4</sub> + OH $\rightarrow$ CO <sub>2</sub> H <sub>3</sub> CHO + HO <sub>2</sub>                                                                                                                                                                                                                                                                                                                                | $k_{\text{sfsoh}} \cdot f_{\text{alk}}$                                                                                                                         | Taraborrelli (2014)       |
| G4457e   | TrGC   | MACO <sub>2</sub> $\rightarrow$ .65 CH <sub>3</sub> O <sub>2</sub> + .65 CO + .65 HCHO + .35 OH + .35 CH <sub>3</sub> COCH <sub>2</sub> O <sub>2</sub> + CO <sub>2</sub>                                                                                                                                                                                                                                                                               | KDEC                                                                                                                                                            | Taraborrelli (2014)       |
| G4458e   | TrGC   | LHMKABO <sub>2</sub> $\rightarrow$ .88 MGLYOX + .88 HCHO + .12 HOOCH <sub>2</sub> CHO + .12 CH <sub>3</sub> C(O)OO + OH                                                                                                                                                                                                                                                                                                                                | KHSD                                                                                                                                                            | Taraborrelli (2014)       |
| G4459e   | TrGNC  | MACRO <sub>2</sub> $\rightarrow$ MGLYOX + HCHO + OH                                                                                                                                                                                                                                                                                                                                                                                                    | KHSB                                                                                                                                                            | Taraborrelli (2014)       |
| G4460e   | TrGNC  | HMVKNO <sub>3</sub> + OH $\rightarrow$ .7 MGLYOX + .7 HCOOH + .7 NO <sub>3</sub> + .3 CO <sub>2</sub> H <sub>3</sub> CHO + .3 NO <sub>2</sub> + H <sub>2</sub> O                                                                                                                                                                                                                                                                                       | 5.6E-12                                                                                                                                                         | Taraborrelli (2014)       |
| G4461e   | TrGC   | MACRN + OH $\rightarrow$ .08 CH <sub>3</sub> COOH + .08 HCHO + .15 NO <sub>3</sub> + .07 HCOOH + .07 MGLYOX + .85 CH <sub>3</sub> COCH <sub>2</sub> OH + .85 NO <sub>3</sub> + .93 CO <sub>2</sub> + H <sub>2</sub> O                                                                                                                                                                                                                                  | 5.E-11                                                                                                                                                          | Taraborrelli (2014)       |
| G4462e   | TrGC   | EZCH <sub>3</sub> CO <sub>2</sub> CHCHO $\rightarrow$ .9 CH <sub>3</sub> COCHCO + .1 CH <sub>3</sub> C(O)OO + .01 GLYOX + .18 CO + .09 HO <sub>2</sub> + OH                                                                                                                                                                                                                                                                                            | k16HS                                                                                                                                                           | Taraborrelli (2014)*      |
| G4463e   | TrGC   | EZCHOCCH <sub>3</sub> CHO <sub>2</sub> $\rightarrow$ HCOCCH <sub>3</sub> CO + OH                                                                                                                                                                                                                                                                                                                                                                       | K16HS                                                                                                                                                           | Taraborrelli (2014)*      |
| G4500e   | TrGC   | C <sub>5</sub> H <sub>8</sub> + O <sub>3</sub> $\rightarrow$ .3508 MACR + 0.01518 MACO <sub>2</sub> H + .2440 MVK + .7085 HCHO + .11 HOCH <sub>2</sub> OOH + .1275 C <sub>3</sub> H <sub>6</sub> + .1575 CH <sub>3</sub> C(O)OO + .0510 CH <sub>3</sub> O <sub>2</sub> + 0.2625 HO <sub>2</sub> + .27 OH + .09482 H <sub>2</sub> O <sub>2</sub> + .255 CO <sub>2</sub> + .522 CO + 0.07182 HCHO + .03618 HCOCH <sub>2</sub> O <sub>2</sub> + .01782 CO | $1.03\text{E-}14 \cdot \text{EXP}(-1995./\text{temp})$                                                                                                          | Taraborrelli (2014)*      |

Table 1: Gas phase reactions (... continued)

| #        | labels | reaction                                                                                                              | rate coefficient                                                 | reference                                  |
|----------|--------|-----------------------------------------------------------------------------------------------------------------------|------------------------------------------------------------------|--------------------------------------------|
| G4501e   | TrGC   | $C_5H_8 + OH \rightarrow .63 \text{ ISOPAB} + .30 \text{ ISOPCD} + .07 \text{ LISOPEFO2}$                             | $2.7E-11*EXP(390./temp)*(1.-iseg)$                               | Taraborrelli (2014)*                       |
| G4502    | TrGNC  | $C_5H_8 + NO_3 \rightarrow NISOP02$                                                                                   | $3.15E-12*EXP(-450./temp)$                                       | Rickard and Pascoe (2009)                  |
| G4503e   | TrGC   | $ISOPAB + O_2 \rightarrow LISOPACO2$                                                                                  | $5.530E-13$                                                      | Taraborrelli (2014)*                       |
| G4504e   | TrGC   | $ISOPAB + O_2 \rightarrow ISOPBO2$                                                                                    | $3.E-12$                                                         | Taraborrelli (2014)*                       |
| G4505e   | TrGC   | $ISOPCD + O_2 \rightarrow DLISOPACO2$                                                                                 | $6.780E-13$                                                      | Taraborrelli (2014)*                       |
| G4506e   | TrGC   | $ISOPCD + O_2 \rightarrow ISOPDO2$                                                                                    | $3.E-12$                                                         | Taraborrelli (2014)*                       |
| G4507e   | TrGC   | $LISOPACO2 \rightarrow ISOPAB + O_2$                                                                                  | $3.1E12*exp(-7900./temp)*.6+$<br>$7.8E13*exp(-8600./temp)*.4$    | Taraborrelli (2014)*                       |
| G4508e   | TrGC   | $ISOPBO2 \rightarrow ISOPAB + O_2$                                                                                    | $3.7E14*exp(-9570./temp)$<br>$+4.2E14*exp(-9970./temp)$          | Taraborrelli (2014)*                       |
| G4509e   | TrGC   | $DLISOPACO2 \rightarrow ISOPCD + O_2$                                                                                 | $5.65E12*exp(-8410./temp)*.42+$<br>$1.4E14*exp(-9110./temp)*.58$ | Taraborrelli (2014)*                       |
| G4510e   | TrGC   | $ISOPDO2 \rightarrow ISOPCD + O_2$                                                                                    | $5.0E14*exp(-10120./temp)$<br>$+8.25E14*exp(-10220/temp)$        | Taraborrelli (2014)*                       |
| G4511e   | TrGC   | $LISOPACO2 \rightarrow ZCODC23DBCOOH + HO_2$                                                                          | K16HS                                                            | Taraborrelli (2014)*                       |
| G4512e   | TrGC   | $DLISOPACO2 \rightarrow ZCODC23DBCOOH + HO_2$                                                                         | K16HS                                                            | Taraborrelli (2014)*                       |
| G4513et3 | TrGC   | $LISOPACO2 \rightarrow .9 \text{ LHC4ACCHO} + .8 \text{ HO}_2 + .1 \text{ ISOPAOH}$                                   | $2.4E-12*R02$                                                    | Rickard and Pascoe (2009)                  |
| G4514t2  | TrGC   | $LISOPACO2 + HO_2 \rightarrow LISOPACOOH$                                                                             | $.706*KR02H02$                                                   | Rickard and Pascoe (2009)                  |
| G4515et2 | TrGNC  | $LISOPACO2 + NO \rightarrow 0.95 \text{ LHC4ACCHO} + 0.95 \text{ HO}_2 + 0.95 \text{ NO}_2 + .05 \text{ LISOPACNO3}$  | KR02N0                                                           | Lockwood et al. (2010),Taraborrelli (2014) |
| G4506et3 | TrGNC  | $LISOPACO2 + NO_3 \rightarrow \text{LHC4ACCHO} + HO_2 + NO_2$                                                         | KR02N03                                                          | Rickard and Pascoe (2009)                  |
| G4507et3 | TrGC   | $DLISOPACO2 \rightarrow .9 \text{ LHC4ACCHO} + .8 \text{ HO}_2 + .1 \text{ ISOPAOH}$                                  | $2.4E-12*R02$                                                    | Rickard and Pascoe (2009)                  |
| G4511et3 | TrGC   | $DLISOPACO2 + HO_2 \rightarrow LISOPACOOH$                                                                            | $.706*KR02H02$                                                   | Rickard and Pascoe (2009)                  |
| G4512et3 | TrGNC  | $DLISOPACO2 + NO \rightarrow 0.95 \text{ LHC4ACCHO} + 0.95 \text{ HO}_2 + 0.95 \text{ NO}_2 + .05 \text{ LISOPACNO3}$ | KR02N0                                                           | Lockwood et al. (2010),Taraborrelli (2014) |
| G4513et4 | TrGNC  | $DLISOPACO2 + NO_3 \rightarrow \text{LHC4ACCHO} + HO_2 + NO_2$                                                        | KR02N03                                                          | Rickard and Pascoe (2009)                  |
| G4514e   | TrGC   | $LISOPACOOH + OH \rightarrow LISOPACO2$                                                                               | $0.6*k\_CH300H\_OH$                                              | Taraborrelli (2014)                        |
| G4514et2 | TrGC   | $LISOPACOOH + OH \rightarrow ZCODC23DBCOOH + HO_2$                                                                    | $ks*fallyl*fsoh$                                                 | Taraborrelli (2014)                        |
| G4514et3 | TrGC   | $LISOPACOOH + OH \rightarrow \text{LHC4ACCHO} + OH$                                                                   | $ks*fsooh*fallyl+ \text{ krohro}$                                | Taraborrelli (2014)                        |
| G4514et4 | TrGC   | $LISOPACOOH + OH \rightarrow \text{IEPOX} + OH$                                                                       | $(kadt+kads)*ach2oh*ach2ooh$                                     | Taraborrelli (2014)                        |
| G4515    | TrGC   | $ISOPAOH + OH \rightarrow \text{LHC4ACCHO} + HO_2$                                                                    | $(kadt+kads)*ach2oh*ach2oh+$<br>$ks*fsoh*fallyl+krohro$          | Taraborrelli (2014)                        |

Table 1: Gas phase reactions (... continued)

| #       | labels | reaction                                                                                                                                                                                                                                                                                                                         | rate coefficient                | reference                                  |
|---------|--------|----------------------------------------------------------------------------------------------------------------------------------------------------------------------------------------------------------------------------------------------------------------------------------------------------------------------------------|---------------------------------|--------------------------------------------|
| G4516e  | TrGNC  | LISOPACNO3 + OH $\rightarrow$ LISOPACNO3O2                                                                                                                                                                                                                                                                                       | 9.5E-11                         | Paulot et al. (2009a),Taraborrelli (2014)  |
| G4517e  | TrGC   | ISOPBO2 $\rightarrow$ .8 MVK + .8 HCHO + .8 HO <sub>2</sub> + .2 ISOPBOH                                                                                                                                                                                                                                                         | 8.E-13*R02                      | Rickard and Pascoe (2009)                  |
| G4518   | TrGC   | ISOPBO2 + HO <sub>2</sub> $\rightarrow$ ISOPBOOH                                                                                                                                                                                                                                                                                 | .706*KR02H02                    | Rickard and Pascoe (2009)                  |
| G4519e  | TrGNC  | ISOPBO2 + NO $\rightarrow$ .947 MVK + .947 HCHO + .947 HO <sub>2</sub> + .947 NO <sub>2</sub> + .053 ISOPBNO3                                                                                                                                                                                                                    | KR02N0                          | Lockwood et al. (2010),Taraborrelli (2014) |
| G4520e  | TrGNC  | ISOPBO2 + NO <sub>3</sub> $\rightarrow$ MVK + .75 HCHO + .75 HO <sub>2</sub> + .25 CH <sub>3</sub> O <sub>2</sub> + NO <sub>2</sub>                                                                                                                                                                                              | KR02N03                         | Rickard and Pascoe (2009)                  |
| G4521ea | TrGC   | ISOPBOOH + OH $\rightarrow$ IEPOX + OH                                                                                                                                                                                                                                                                                           | (kads+kadp)*ach2ooh             | Paulot et al. (2009b),Taraborrelli (2014)  |
| G4521eb | TrGC   | ISOPBOOH + OH $\rightarrow$ ISOPBO2                                                                                                                                                                                                                                                                                              | 0.6*k_CH300H_OH                 | Taraborrelli (2014)                        |
| G4521ec | TrGC   | ISOPBOOH + O <sub>3</sub> $\rightarrow$ 0.1368 MACROOH + 0.1368 H <sub>2</sub> O <sub>2</sub> + 0.2280 HO <sub>2</sub> + 0.4332 CH <sub>3</sub> COCH <sub>2</sub> OH + 0.2280 CO <sub>2</sub> + 0.6384 OH + 0.2052 CO + .57 HCHO + .43 MACROOH + 0.06880 HO <sub>2</sub> + 0.06880 OH + 0.2709 CO + 0.1591 HOCH <sub>2</sub> OOH | 1.E-17                          | Taraborrelli (2014)*                       |
| G41911  | TrGC   | ISOPBOOH + OH $\rightarrow$ MGLYOX + HOCH <sub>2</sub> CHO                                                                                                                                                                                                                                                                       | krohro+ks*falk*fsoh             | Taraborrelli (2014)                        |
| G4522e  | TrGC   | ISOPBOH + OH $\rightarrow$ MVK + .75 HCHO + .75 HO <sub>2</sub> + .25 CH <sub>3</sub> O <sub>2</sub>                                                                                                                                                                                                                             | ks*falk*fsoh+(kadp+kads)*ach2oh | Taraborrelli (2014)                        |
| G4523e  | TrGNC  | ISOPBNO3 + OH $\rightarrow$ ISOPBDNO3O2                                                                                                                                                                                                                                                                                          | 1.3E-11                         | Paulot et al. (2009a),Taraborrelli (2014)  |
| G4524   | TrGC   | ISOPDO2 $\rightarrow$ .8 MACR + .8 HCHO + .8 HO <sub>2</sub> + .1 HCOC5 + .1 ISOPDOH                                                                                                                                                                                                                                             | 2.9E-12*R02                     | Rickard and Pascoe (2009)                  |
| G4525   | TrGC   | ISOPDO2 + HO <sub>2</sub> $\rightarrow$ ISOPDOOH                                                                                                                                                                                                                                                                                 | .706*KR02H02                    | Rickard and Pascoe (2009)                  |
| G4526e  | TrGNC  | ISOPDO2 + NO $\rightarrow$ .85 MACR + .85 HCHO + .85 HO <sub>2</sub> + .85 NO <sub>2</sub> + .15 ISOPDNO3                                                                                                                                                                                                                        | KR02N0                          | Lockwood et al. (2010),Taraborrelli (2014) |
| G4527   | TrGNC  | ISOPDO2 + NO <sub>3</sub> $\rightarrow$ MACR + HCHO + HO <sub>2</sub> + NO <sub>2</sub>                                                                                                                                                                                                                                          | KR02N03                         | Rickard and Pascoe (2009)                  |
| G4528ea | TrGC   | ISOPDOOH + OH $\rightarrow$ IEPOX + OH                                                                                                                                                                                                                                                                                           | (kadt+kadp)*ach2ooh             | Paulot et al. (2009b),Taraborrelli (2014)  |
| G4528eb | TrGC   | ISOPDOOH + OH $\rightarrow$ ISOPDO2                                                                                                                                                                                                                                                                                              | 0.6*k_CH300H_OH                 | Taraborrelli (2014)                        |
| G4528ec | TrGC   | ISOPDOOH + OH $\rightarrow$ HCOC5 + OH                                                                                                                                                                                                                                                                                           | kt*ftooh*fallyl*fpch2oh         | Taraborrelli (2014)                        |
| G4528ed | TrGC   | ISOPDOOH + OH $\rightarrow$ CH <sub>3</sub> COCH <sub>2</sub> OH + GLYOX + OH                                                                                                                                                                                                                                                    | ks*fpch2oh*fsoh                 | Taraborrelli (2014)                        |
| G45222  | TrGC   | ISOPDOOH + O <sub>3</sub> $\rightarrow$ 1.393 OH + BIACETOH + .67 HCHO + 0.05280 HO <sub>2</sub> + 0.2079 CO + 0.1221 HOCH <sub>2</sub> OOH                                                                                                                                                                                      | 1.E-17                          | Taraborrelli (2014)*                       |

Table 1: Gas phase reactions (... continued)

| #        | labels | reaction                                                                                                                                                                                                                                                                                                                                                       | rate coefficient                                                  | reference                                  |
|----------|--------|----------------------------------------------------------------------------------------------------------------------------------------------------------------------------------------------------------------------------------------------------------------------------------------------------------------------------------------------------------------|-------------------------------------------------------------------|--------------------------------------------|
| G4529e   | TrGC   | ISOPDOH + OH $\rightarrow$ HCOC5 + HO <sub>2</sub>                                                                                                                                                                                                                                                                                                             | 2.*krohro+(kt*ftoh*fallyl+ks*fsoh)<br>*fpch2oh+(kadt+kadp)*ach2oh | Taraborrelli (2014)                        |
| G4530e   | TrGNC  | ISOPDNO3 + OH $\rightarrow$ ISOPBDNO3O2                                                                                                                                                                                                                                                                                                                        | 1.3E-11                                                           | Paulot et al. (2009a), Taraborrelli (2014) |
| G4531    | TrGNC  | NISOPO2 $\rightarrow$ .8 NC4CHO + .6 HO <sub>2</sub> + .2 LISOPACNO3                                                                                                                                                                                                                                                                                           | 1.3E-12*R02                                                       | Rickard and Pascoe (2009)                  |
| G4532    | TrGNC  | NISOPO2 + HO <sub>2</sub> $\rightarrow$ NISOPOOH                                                                                                                                                                                                                                                                                                               | .706*KR02H02                                                      | Rickard and Pascoe (2009)                  |
| G4533    | TrGNC  | NISOPO2 + NO $\rightarrow$ NC4CHO + HO <sub>2</sub> + NO <sub>2</sub>                                                                                                                                                                                                                                                                                          | KR02N0                                                            | Rickard and Pascoe (2009)                  |
| G4534    | TrGNC  | NISOPO2 + NO <sub>3</sub> $\rightarrow$ NC4CHO + HO <sub>2</sub> + NO <sub>2</sub>                                                                                                                                                                                                                                                                             | KR02N03                                                           | Rickard and Pascoe (2009)                  |
| G4535    | TrGNC  | NISOPOOH + OH $\rightarrow$ NC4CHO + OH                                                                                                                                                                                                                                                                                                                        | 1.03E-10                                                          | Rickard and Pascoe (2009)                  |
| G4536    | TrGNC  | NC4CHO + OH $\rightarrow$ LNISO3                                                                                                                                                                                                                                                                                                                               | 4.16E-11                                                          | Rickard and Pascoe (2009)                  |
| G4537e   | TrGNC  | NC4CHO + O <sub>3</sub> $\rightarrow$ .27 NOA + .027 HCOCO <sub>2</sub> H + .0162 GLYOX + .0162 H <sub>2</sub> O <sub>2</sub> + .1458 HCOCO3A + .0405 HCOOH + .0405 CO + .8758 OH + .365 MGLYOX + .73 NO <sub>2</sub> + 0.7705 HCHO + .4055 CO <sub>2</sub> + .73 GLYOX                                                                                        | 2.40E-17                                                          | Taraborrelli (2014)*                       |
| G4538    | TrGNC  | NC4CHO + NO <sub>3</sub> $\rightarrow$ LNISO3 + HNO <sub>3</sub>                                                                                                                                                                                                                                                                                               | KN03AL*4.25                                                       | Rickard and Pascoe (2009)                  |
| G4539    | TrGNC  | LNISO3 + HO <sub>2</sub> $\rightarrow$ LNISOOH                                                                                                                                                                                                                                                                                                                 | .5*.706*KR02H02 + .5*KAPH02                                       | Rickard and Pascoe (2009)                  |
| G4540e   | TrGNC  | LNISO3 + NO $\rightarrow$ NOA + .5 HOCHCHO + .5 CO + .5 HO <sub>2</sub> + NO <sub>2</sub> + .5 CO <sub>2</sub>                                                                                                                                                                                                                                                 | .5*KAPNO +.5*KR02N0                                               | Rickard and Pascoe (2009)                  |
| G4541e   | TrGNC  | LNISO3 + NO <sub>3</sub> $\rightarrow$ NOA + .5 HOCHCHO + .5 CO + .5 HO <sub>2</sub> + NO <sub>2</sub> + .5 CO <sub>2</sub>                                                                                                                                                                                                                                    | 1.3*KR02N03                                                       | Rickard and Pascoe (2009)                  |
| G4542    | TrGNC  | LNISOOH + OH $\rightarrow$ LNISO3                                                                                                                                                                                                                                                                                                                              | 2.65E-11                                                          | Rickard and Pascoe (2009)                  |
| G4543e   | TrGC   | LHC4ACCHO + OH $\rightarrow$ LC578O2                                                                                                                                                                                                                                                                                                                           | (kadtertprim+kads)*acho*ach2oh                                    | Taraborrelli (2014)                        |
| G4543et2 | TrGC   | LHC4ACCHO + OH $\rightarrow$ LHC4ACCO3                                                                                                                                                                                                                                                                                                                         | kcho                                                              | Taraborrelli (2014)                        |
| G4543et3 | TrGC   | LHC4ACCHO + OH $\rightarrow$ ZCODC23DBCOD + HO <sub>2</sub>                                                                                                                                                                                                                                                                                                    | ks*fsoh*fallyl                                                    | Taraborrelli (2014)                        |
| G4544    | TrGC   | LHC4ACCHO + O <sub>3</sub> $\rightarrow$ .2225 CH <sub>3</sub> C(O)OO + .89 CO + .0171875 HOCH <sub>2</sub> CO <sub>2</sub> H + .075625 H <sub>2</sub> O <sub>2</sub> + .0171875 HCOCO <sub>2</sub> H + .2775 CH <sub>3</sub> COCH <sub>2</sub> OH + .6675 HO <sub>2</sub> + .2603125 GLYOX + .2225 HCHO + .89 OH + .2603125 HOCH <sub>2</sub> CHO + .5 MGLYOX | 2.40E-17                                                          | Rickard and Pascoe (2009)                  |
| G4545    | TrGNC  | LHC4ACCHO + NO <sub>3</sub> $\rightarrow$ LHC4ACCO3 + HNO <sub>3</sub>                                                                                                                                                                                                                                                                                         | KN03AL*4.25                                                       | Rickard and Pascoe (2009)                  |
| G4546e   | TrGC   | LC578O2 $\rightarrow$ .25 CH <sub>3</sub> COCH <sub>2</sub> OH + .75 MGLYOX + .25 HOCHCHO + .75 HOCH <sub>2</sub> CHO + .75 HO <sub>2</sub>                                                                                                                                                                                                                    | 9.20E-14*R02                                                      | Rickard and Pascoe (2009)                  |
| G4547e   | TrGC   | LC578O2 + HO <sub>2</sub> $\rightarrow$ MGLYOX + HOCH <sub>2</sub> CHO + OH                                                                                                                                                                                                                                                                                    | KR02H02*0.706*rcoch2o2_oh                                         | Rickard and Pascoe (2009)                  |
| G4547et2 | TrGC   | LC578O2 + HO <sub>2</sub> $\rightarrow$ LC578OOH                                                                                                                                                                                                                                                                                                               | KR02H02*0.706*rcoch2o2_ooh                                        | Rickard and Pascoe (2009)                  |

Table 1: Gas phase reactions (... continued)

| #        | labels | reaction                                                                                                                                                                                | rate coefficient                                                                           | reference                 |
|----------|--------|-----------------------------------------------------------------------------------------------------------------------------------------------------------------------------------------|--------------------------------------------------------------------------------------------|---------------------------|
| G4548e   | TrGNC  | $\text{LC578O2} + \text{NO} \rightarrow .25 \text{CH}_3\text{COCH}_2\text{OH} + .75 \text{MGLYOX} + .25 \text{HOCHCHO} + .75 \text{HOCH}_2\text{CHO} + .75 \text{HO}_2 + \text{NO}_2$   | KR02N0                                                                                     | Rickard and Pascoe (2009) |
| G4549e   | TrGNC  | $\text{LC578O2} + \text{NO}_3 \rightarrow .25 \text{CH}_3\text{COCH}_2\text{OH} + .75 \text{MGLYOX} + .25 \text{HOCHCHO} + .75 \text{HOCH}_2\text{CHO} + .75 \text{HO}_2 + \text{NO}_2$ | KR02N03                                                                                    | Rickard and Pascoe (2009) |
| G4586e   | TrGC   | $\text{LC578O2} \rightarrow .25 \text{CH}_3\text{COCH}_2\text{OH} + .75 \text{MGLYOX} + .25 \text{HOCH}_2\text{CHO} + .75 \text{HOCH}_2\text{CHO} + \text{HO}_2 + \text{OH}$            | KHSB                                                                                       | Taraborrelli (2014)       |
| G4550e   | TrGC   | $\text{LC578OOH} + \text{OH} \rightarrow \text{LC578O2}$                                                                                                                                | $0.6 * k_{\text{CH300H\_OH}}$                                                              | Taraborrelli (2014)*      |
| G4550et2 | TrGC   | $\text{LC578OOH} + \text{OH} \rightarrow \text{C1ODC2OOHC4OD} + \text{HO}_2$                                                                                                            | $kt * fo * ftch2oh * falk +$<br>$kt * ftoh * fpch2oh * fpch2oh +$<br>$ks * fsoh * fpch2oh$ | Taraborrelli (2014)*      |
| G4551e   | TrGC   | $\text{LHC4ACCO3} \rightarrow .3 \text{LHC4ACCO2H} + .7 \text{OH} + .35 \text{MACRO2} + .35 \text{LHMKABO2} + .7 \text{CO}_2$                                                           | $1.00\text{E-}11 * R02$                                                                    | Taraborrelli (2014)*      |
| G4552e   | TrGC   | $\text{LHC4ACCO3} + \text{HO}_2 \rightarrow 2 \text{OH} + .5 \text{MACRO2} + .5 \text{LHMKABO2} + \text{CO}_2$                                                                          | $\text{KAPH02} * rco3\_oh$                                                                 | Taraborrelli (2014)*      |
| G4552et2 | TrGC   | $\text{LHC4ACCO3} + \text{HO}_2 \rightarrow \text{LHC4ACCO3H}$                                                                                                                          | $\text{KAPH02} * rco3\_ooh$                                                                | Taraborrelli (2014)       |
| G4552et3 | TrGC   | $\text{LHC4ACCO3} + \text{HO}_2 \rightarrow \text{LHC4ACCO2H} + \text{O}_3$                                                                                                             | $\text{KAPH02} * rco3\_o3$                                                                 | Taraborrelli (2014)       |
| G4553e   | TrGNC  | $\text{LHC4ACCO3} + \text{NO} \rightarrow .5 \text{MACRO2} + .5 \text{LHMKABO2} + \text{NO}_2 + \text{CO}_2$                                                                            | KAPN0                                                                                      | Taraborrelli (2014)*      |
| G4554    | TrGNC  | $\text{LHC4ACCO3} + \text{NO}_2 \rightarrow \text{LC5PAN1719}$                                                                                                                          | $k_{\text{CH3C03\_N02}}$                                                                   | Rickard and Pascoe (2009) |
| G4555e   | TrGNC  | $\text{LHC4ACCO3} + \text{NO}_3 \rightarrow .5 \text{MACRO2} + .5 \text{LHMKABO2} + \text{NO}_2 + \text{CO}_2$                                                                          | $1.6 * \text{KR02N03}$                                                                     | Taraborrelli (2014)*      |
| G4556e   | TrGC   | $\text{LHC4ACCO2H} + \text{OH} \rightarrow \text{OH} + .5 \text{MACRO2} + .5 \text{LHMKABO2} + \text{CO}_2$                                                                             | $2.52\text{E-}11$                                                                          | Taraborrelli (2014)       |
| G4557    | TrGC   | $\text{LHC4ACCO3H} + \text{OH} \rightarrow \text{LHC4ACCO3}$                                                                                                                            | $2.88\text{E-}11$                                                                          | Rickard and Pascoe (2009) |
| G4558    | TrGNC  | $\text{LC5PAN1719} \rightarrow \text{LHC4ACCO3} + \text{NO}_2$                                                                                                                          | $k_{\text{PAN\_M}}$                                                                        | Rickard and Pascoe (2009) |
| G4559    | TrGNC  | $\text{LC5PAN1719} + \text{OH} \rightarrow .5 \text{MACROH} + .5 \text{HO12CO3C4} + \text{CO} + \text{NO}_2$                                                                            | $2.52\text{E-}11$                                                                          | Rickard and Pascoe (2009) |
| G4560a   | TrGC   | $\text{HCOC5} + \text{OH} \rightarrow \text{C59O2}$                                                                                                                                     | $3.81\text{E-}11$                                                                          | Rickard and Pascoe (2009) |
| G4560eb  | TrGC   | $\text{HCOC5} + \text{O}_3 \rightarrow \text{BIACETOH} + .335 \text{H}_2\text{O}_2 + 0.67 \text{HCHO} + 0.2079 \text{CO} + 0.1221 \text{HOCH2OOH} + 0.05280 \text{OH}$                  | $7.51\text{E-}16 * \text{EXP}(-1521./\text{temp})$                                         | Taraborrelli (2014)       |
| G4561    | TrGC   | $\text{C59O2} \rightarrow \text{CH}_3\text{COCH}_2\text{OH} + \text{HOCH2CO}$                                                                                                           | $9.20\text{E-}14 * R02$                                                                    | Taraborrelli (2014)       |
| G4562e   | TrGC   | $\text{C59O2} + \text{HO}_2 \rightarrow \text{OH} + \text{CH}_3\text{COCH}_2\text{OH} + \text{HOCH2CO}$                                                                                 | $\text{KR02H02} * 0.706 * rcoch2o2\_oh$                                                    | Taraborrelli (2014)       |
| G4562et2 | TrGC   | $\text{C59O2} + \text{HO}_2 \rightarrow \text{C59OOH}$                                                                                                                                  | $\text{KR02H02} * 0.706 * rcoch2o2\_ooh$                                                   | Taraborrelli (2014)       |
| G4563    | TrGNC  | $\text{C59O2} + \text{NO} \rightarrow \text{CH}_3\text{COCH}_2\text{OH} + \text{HOCH2CO} + \text{NO}_2$                                                                                 | KR02N0                                                                                     | Taraborrelli (2014)       |
| G4564    | TrGNC  | $\text{C59O2} + \text{NO}_3 \rightarrow \text{CH}_3\text{COCH}_2\text{OH} + \text{HOCH2CO} + \text{NO}_2$                                                                               | KR02N03                                                                                    | Taraborrelli (2014)       |

Table 1: Gas phase reactions (... continued)

| #        | labels | reaction                                                                                                                                                                                                                                                                                                                                                                                                                                                                                                                                                                                                                                                                                                                                                                                                                                                       | rate coefficient                                                   | reference                                  |
|----------|--------|----------------------------------------------------------------------------------------------------------------------------------------------------------------------------------------------------------------------------------------------------------------------------------------------------------------------------------------------------------------------------------------------------------------------------------------------------------------------------------------------------------------------------------------------------------------------------------------------------------------------------------------------------------------------------------------------------------------------------------------------------------------------------------------------------------------------------------------------------------------|--------------------------------------------------------------------|--------------------------------------------|
| G4565    | TrGC   | $\text{C59OOH} + \text{OH} \rightarrow \text{C59O2}$                                                                                                                                                                                                                                                                                                                                                                                                                                                                                                                                                                                                                                                                                                                                                                                                           | 9.7E-12                                                            | Taraborrelli (2014)                        |
| G4566e   | TrGC   | $\text{IEPOX} + \text{OH} \rightarrow \text{LC578O2} + \text{H}_2\text{O}$                                                                                                                                                                                                                                                                                                                                                                                                                                                                                                                                                                                                                                                                                                                                                                                     | $5.78\text{E-}11 * \text{EXP}(-400/\text{temp})$                   | Paulot et al. (2009b), Taraborrelli (2014) |
| G4567e   | TrGC   | $\text{ISOPBO2} \rightarrow \text{MVK} + \text{HCHO} + \text{OH}$                                                                                                                                                                                                                                                                                                                                                                                                                                                                                                                                                                                                                                                                                                                                                                                              | KHSB                                                               | Taraborrelli (2014)                        |
| G4568e   | TrGC   | $\text{ISOPDO2} \rightarrow \text{MACR} + \text{HCHO} + \text{OH}$                                                                                                                                                                                                                                                                                                                                                                                                                                                                                                                                                                                                                                                                                                                                                                                             | KHSD                                                               | Taraborrelli (2014)                        |
| G4577ea  | TrGC   | $\text{ZCODC23DBCOOH} + \text{OH} \rightarrow .6 \text{ C1ODC2O2C4OOH} + .4 \text{ C1OOHC2O2C4OD}$                                                                                                                                                                                                                                                                                                                                                                                                                                                                                                                                                                                                                                                                                                                                                             | $\text{kadt} * \text{acho} * \text{ach2ooh}$                       | Taraborrelli (2014)                        |
| G4577eb  | TrGC   | $\text{ZCODC23DBCOOH} + \text{OH} \rightarrow .6 \text{ C1ODC3O2C4OOH} + .4 \text{ C1OOHC3O2C4OD}$                                                                                                                                                                                                                                                                                                                                                                                                                                                                                                                                                                                                                                                                                                                                                             | $\text{kads} * \text{acho} * \text{ach2ooh}$                       | Taraborrelli (2014)                        |
| G4577e   | TrGC   | $\text{ZCODC23DBCOOH} + \text{OH} \rightarrow \text{ZCO3HC23DBCOD}$                                                                                                                                                                                                                                                                                                                                                                                                                                                                                                                                                                                                                                                                                                                                                                                            | $\text{kt} * \text{fo} * \text{falk} + 0.6 * \text{k\_CH3OOH\_OH}$ | Taraborrelli (2014)                        |
| G4577et2 | TrGC   | $\text{ZCODC23DBCOOH} + \text{OH} \rightarrow \text{OH} + \text{ZCODC23DBCOD}$                                                                                                                                                                                                                                                                                                                                                                                                                                                                                                                                                                                                                                                                                                                                                                                 | $\text{ks} * \text{fsooh} * \text{fallyl}$                         | Taraborrelli (2014)                        |
| G4577et3 | TrGC   | $\text{ZCODC23DBCOOH} + \text{O}_3 \rightarrow .4672 \text{ OH} + .2336 \text{ HCOCOCH2O2} + .2336 \text{ CO} + .2336 \text{ CH}_3\text{C(O)OO} + .4672 \text{ HOOCH2CHO} + .1728 \text{ MGLYOX} + .1901 \text{ OH} + .0864 \text{ GLYOX} + .02765 \text{ HOOCH2CHO} + .02765 \text{ H}_2\text{O}_2 + .02592 \text{ CH}_3\text{OOH} + .02592 \text{ CO}_2 + .01037 \text{ HCOCO3A} + .01555 \text{ HOCH2OOH} + .01555 \text{ CO} + .006912 \text{ HOOCH2CO3} + .2628 \text{ OH} + .1314 \text{ MGLYOX} + .1314 \text{ OH} + .1314 \text{ HCOCOCH2OOH} + 0.2628 \text{ GLYOX} + .0972 \text{ CH}_3\text{COCH}_2\text{O}_2\text{H} + .00972 \text{ HCOCO}_2\text{H} + .005832 \text{ GLYOX} + .005832 \text{ H}_2\text{O}_2 + .05249 \text{ OH} + .05249 \text{ HCOCO3A} + .01458 \text{ HCHO} + .01458 \text{ CO}_2 + .01458 \text{ HCOOH} + .01458 \text{ CO}$ | 2.4E-17                                                            | Taraborrelli (2014)*                       |
| G4578e   | TrGC   | $\text{C1OOHC2O2C4OD} \rightarrow .78 \text{ CH}_3\text{COCH}_2\text{O}_2\text{H} + .78 \text{ HOCHCHO} + .22 \text{ CO2H3CHO} + .22 \text{ HCHO} + .22 \text{ OH}$                                                                                                                                                                                                                                                                                                                                                                                                                                                                                                                                                                                                                                                                                            | $8.00\text{E-}13 * \text{R02}$                                     | Taraborrelli (2014)                        |
| G4579e   | TrGC   | $\text{C1OOHC2O2C4OD} + \text{NO} \rightarrow .78 \text{ CH}_3\text{COCH}_2\text{O}_2\text{H} + .78 \text{ HOCHCHO} + .22 \text{ CO2H3CHO} + .22 \text{ HCHO} + .22 \text{ OH} + \text{NO}_2$                                                                                                                                                                                                                                                                                                                                                                                                                                                                                                                                                                                                                                                                  | KR02N0                                                             | Taraborrelli (2014)                        |
| G4580e   | TrGC   | $\text{C1OOHC2O2C4OD} + \text{HO}_2 \rightarrow \text{C1OOHC2OOHC4OD}$                                                                                                                                                                                                                                                                                                                                                                                                                                                                                                                                                                                                                                                                                                                                                                                         | $\text{KR02H02} * 0.706$                                           | Taraborrelli (2014)                        |
| G4580ea  | TrGC   | $\text{C1OOHC2O2C4OD} \rightarrow \text{CH}_3\text{COCH}_2\text{O}_2\text{H} + \text{GLYOX} + \text{OH}$                                                                                                                                                                                                                                                                                                                                                                                                                                                                                                                                                                                                                                                                                                                                                       | KHSB                                                               | Taraborrelli (2014)                        |
| G4581e   | TrGC   | $\text{C1ODC2O2C4OOH} \rightarrow \text{OH} + \text{C1ODC2OOHC4OD}$                                                                                                                                                                                                                                                                                                                                                                                                                                                                                                                                                                                                                                                                                                                                                                                            | K15HSDHB                                                           | Taraborrelli (2014)                        |
| G4581et2 | TrGC   | $\text{C1OOHC2OOHC4OD} + \text{OH} \rightarrow \text{C1ODC2OOHC4OD} + \text{OH}$                                                                                                                                                                                                                                                                                                                                                                                                                                                                                                                                                                                                                                                                                                                                                                               | $\text{ks} * \text{fsooh} * \text{fpch2oh}$                        | Taraborrelli (2014)                        |
| G4581et3 | TrGC   | $\text{C1OOHC2OOHC4OD} + \text{OH} \rightarrow \text{CH}_3\text{COCH}_2\text{O}_2\text{H} + \text{OH} + 2 \text{ CO} + 2 \text{ HO}_2$                                                                                                                                                                                                                                                                                                                                                                                                                                                                                                                                                                                                                                                                                                                         | $\text{kt} * \text{ftoh} * \text{fpch2oh} * \text{fpch2oh}$        | Taraborrelli (2014)                        |



Table 1: Gas phase reactions (... continued)

| #         | labels | reaction                                                                                                                                                                                                                                                                                                                               | rate coefficient                                                                       | reference            |
|-----------|--------|----------------------------------------------------------------------------------------------------------------------------------------------------------------------------------------------------------------------------------------------------------------------------------------------------------------------------------------|----------------------------------------------------------------------------------------|----------------------|
| G4581et4  | TrGC   | $\text{C1OOHC2OOHC4OD} + \text{OH} \rightarrow \text{C1OOHC2O2C4OD}$                                                                                                                                                                                                                                                                   | $0.6 \cdot k_{\text{CH3OOH\_OH}}$                                                      | Taraborrelli (2014)  |
| G4581et6  | TrGC   | $\text{C1ODC3O2C4OOH} \rightarrow \text{MGLYOX} + \text{HOOCH2CHO} + \text{HO}_2$                                                                                                                                                                                                                                                      | $2.90\text{E-}12 \cdot R_{02}$                                                         | Taraborrelli (2014)  |
| G4581et7  | TrGC   | $\text{C1ODC3O2C4OOH} + \text{NO} \rightarrow \text{MGLYOX} + \text{HOOCH2CHO} + \text{HO}_2 + \text{NO}_2$                                                                                                                                                                                                                            | $K_{R02N0}$                                                                            | Taraborrelli (2014)  |
| G4581et8  | TrGC   | $\text{C1ODC3O2C4OOH} + \text{HO}_2 \rightarrow .5 \text{ CH}_3\text{C(O)OO} + .5 \text{ CO} + .5 \text{ MGLYOX} + .5 \text{ HO}_2 + \text{HOOCH2CO3}$                                                                                                                                                                                 | $K_{R02H02} \cdot 0.706$                                                               | Taraborrelli (2014)* |
| G4581et9  | TrGC   | $\text{C1ODC3O2C4OOH} \rightarrow \text{MGLYOX} + \text{OH} + \text{HOOCH2CHO}$                                                                                                                                                                                                                                                        | KHSD                                                                                   | Taraborrelli (2014)  |
| G4581et10 | TrGC   | $\text{C1OOHC3O2C4OD} \rightarrow .625 \text{ MGLYOX} + 2 \text{ CO} + 1.625 \text{ HO}_2 + .375 \text{ CH}_3\text{C(O)OO} + .375 \text{ CO}_2 + \text{OH}$                                                                                                                                                                            | $K_{15HSDHB}$                                                                          | Taraborrelli (2014)* |
| G4582e    | TrGC   | $\text{LHC4ACCO3} \rightarrow \text{ZCO3HC23DBCOD} + \text{HO}_2$                                                                                                                                                                                                                                                                      | $K_{16HS}$                                                                             | Taraborrelli (2014)* |
| G4583e    | TrGC   | $\text{ZCODC23DBCOD} + \text{OH} \rightarrow \text{C1ODC2O2C4OD}$                                                                                                                                                                                                                                                                      | $2 \cdot kt \cdot fo \cdot falk + (kadt + kads) \cdot acho \cdot acho$                 | Taraborrelli (2014)  |
| G4584e    | TrGC   | $\text{C1ODC2O2C4OD} + \text{HO}_2 \rightarrow \text{OH} + \text{MGLYOX} + \text{HOCHCHO}$                                                                                                                                                                                                                                             | $K_{R02H02} \cdot 0.706 \cdot r_{\text{coch2o2\_oh}}$                                  | Taraborrelli (2014)  |
| G4584et2  | TrGC   | $\text{C1ODC2O2C4OD} + \text{HO}_2 \rightarrow \text{C1ODC2OOHC4OD}$                                                                                                                                                                                                                                                                   | $K_{R02H02} \cdot 0.706 \cdot r_{\text{coch2o2\_ooh}}$                                 | Taraborrelli (2014)  |
| G4585e    | TrGC   | $\text{C1ODC2O2C4OD} + \text{NO} \rightarrow \text{NO}_2 + \text{MGLYOX} + \text{HOCHCHO}$                                                                                                                                                                                                                                             | $K_{R02N0}$                                                                            | Taraborrelli (2014)  |
| G4585et2  | TrGC   | $\text{C1ODC2O2C4OD} \rightarrow \text{MGLYOX} + \text{HOCHCHO}$                                                                                                                                                                                                                                                                       | $8.00\text{E-}13 \cdot R_{02}$                                                         | Taraborrelli (2014)  |
| G4585et3  | TrGC   | $\text{C1ODC2OOHC4OD} + \text{OH} \rightarrow \text{MGLYOX} + 2 \text{ CO} + .5 \text{ OH}$                                                                                                                                                                                                                                            | $2 \cdot kt \cdot fo \cdot ftch2oh \cdot falk + kt \cdot fto \cdot fcho \cdot fpch2oh$ | Taraborrelli (2014)* |
| G4587e    | TrGC   | $\text{LISOPACNO3O2} + \text{NO} \rightarrow .21 \text{ NOA} + .21 \text{ HOCH}_2\text{CHO} + .21 \text{ HO}_2 + .49 \text{ HO12CO3C4} + .49 \text{ HCHO} + .49 \text{ NO}_2 + .045 \text{ HMKVNO3} + .045 \text{ HCHO} + .255 \text{ CH}_3\text{COCH}_2\text{OH} + .255 \text{ NO3CH2CHO} + .225 \text{ H}_2\text{O}_2 + \text{NO}_2$ | $K_{R02N0}$                                                                            | Taraborrelli (2014)  |
| G4587et2  | TrGC   | $\text{LISOPACNO3O2} \rightarrow .21 \text{ NOA} + .21 \text{ HOCH}_2\text{CHO} + .21 \text{ HO}_2 + .49 \text{ HO12CO3C4} + .49 \text{ HCHO} + .49 \text{ NO}_2 + .045 \text{ HMKVNO3} + .045 \text{ HCHO} + .255 \text{ CH}_3\text{COCH}_2\text{OH} + .255 \text{ NO3CH2CHO} + .225 \text{ H}_2\text{O}_2$                           | $8.00\text{E-}13 \cdot R_{02} + K_{R02H02} \cdot 0.706 \cdot c(\text{ind\_H02})$       | Taraborrelli (2014)  |
| G4587et3  | TrGC   | $\text{ISOPBDNO3O2} + \text{NO} \rightarrow .6 \text{ CH}_3\text{COCH}_2\text{OH} + .6 \text{ HOCH}_2\text{CHO} + .26 \text{ MACRN} + .14 \text{ HMKVNO3} + .4 \text{ HCHO} + .4 \text{ HO}_2 + 1.6 \text{ NO}_2$                                                                                                                      | $K_{R02N0}$                                                                            | Taraborrelli (2014)  |
| G4587et4  | TrGC   | $\text{ISOPBDNO3O2} \rightarrow .6 \text{ CH}_3\text{COCH}_2\text{OH} + .6 \text{ HOCH}_2\text{CHO} + .26 \text{ MACRN} + .14 \text{ HMKVNO3} + .4 \text{ HCHO} + .4 \text{ HO}_2 + .6 \text{ NO}_2$                                                                                                                                   | $2.9\text{E-}12 \cdot R_{02} + K_{R02H02} \cdot 0.706 \cdot c(\text{ind\_H02})$        | Taraborrelli (2014)  |

Table 1: Gas phase reactions (... continued)

| #        | labels | reaction                                                                                                                                                                                                                                                                                                                                                                                                                                                                                                                                                                               | rate coefficient       | reference            |
|----------|--------|----------------------------------------------------------------------------------------------------------------------------------------------------------------------------------------------------------------------------------------------------------------------------------------------------------------------------------------------------------------------------------------------------------------------------------------------------------------------------------------------------------------------------------------------------------------------------------------|------------------------|----------------------|
| G4588e   | TrGNC  | LISOPACNO3 + O <sub>3</sub> → .8704 OH + .365 HO <sub>2</sub> + .73 MGLYOX + .4325 NO <sub>3</sub> CH <sub>2</sub> CHO + .135 CH <sub>3</sub> COCH <sub>2</sub> OH + .0675 GLYOX + .4325 NO <sub>2</sub> + .0891 H <sub>2</sub> O <sub>2</sub> + .135 NOA + .0675 HOCHCHO + .3866 HOCH <sub>2</sub> CHO + .0405 CH <sub>3</sub> OH + .0405 CO + .0054 HOCH <sub>2</sub> CO                                                                                                                                                                                                             | 4.E-16                 | Taraborrelli (2014)  |
| G4599e   | TrGC   | LISOPACOOH + O <sub>3</sub> → 1.3272 OH + 0.36986 HO <sub>2</sub> + .0432 H <sub>2</sub> O <sub>2</sub> + 0.23002 CO + .2025 CH <sub>3</sub> OOH + .01215 HOCH <sub>2</sub> OOH + 0.3704 HCHO + .00405 CH <sub>3</sub> OH + .0405 CO <sub>2</sub> + .1825 HOCH <sub>2</sub> COCH <sub>2</sub> O <sub>2</sub> + .365 MGLYOX + .3866 HOOCH <sub>2</sub> CHO + .135 CH <sub>3</sub> COCH <sub>2</sub> OH + .0675 GLYOX + .00324 HCOCO <sub>3</sub> A + .3866 HOCH <sub>2</sub> CHO + .135 CH <sub>3</sub> COCH <sub>2</sub> O <sub>2</sub> H + .0675 HOCHCHO + .0054 HOCH <sub>2</sub> CO | 4.829E-16              | Taraborrelli (2014)  |
| G4598et3 | TrGC   | ZCO3HC23DBCOD + OH → .62 CO <sub>2</sub> H <sub>3</sub> CHO + .62 OH + .62 CO <sub>2</sub> + .38 MGLYOX + .38 HCOCO <sub>3</sub> H + .38 HO <sub>2</sub>                                                                                                                                                                                                                                                                                                                                                                                                                               | kadt*acho*aco2h        | Taraborrelli (2014)* |
| G4598et4 | TrGC   | ZCO3HC23DBCOD + OH → .62 CH <sub>3</sub> COCO <sub>3</sub> H + 1.24 CO + 1.24 HO <sub>2</sub> + .38 CH <sub>3</sub> COCHOH + .38 CO + .38 HO <sub>2</sub> + .38 OH + .38 CO <sub>2</sub>                                                                                                                                                                                                                                                                                                                                                                                               | kads*acho*aco2h        | Taraborrelli (2014)* |
| G41311   | TrGC   | LISOPEFO2 → .7143 MACR + .2857 MVK + HCHO + HO <sub>2</sub>                                                                                                                                                                                                                                                                                                                                                                                                                                                                                                                            | 2.40E-12*R02           | Taraborrelli (2014)  |
| G41341   | TrGC   | LISOPEFO2 + NO → .7143 MACR + .2857 MVK + HCHO + HO <sub>2</sub> + NO <sub>2</sub>                                                                                                                                                                                                                                                                                                                                                                                                                                                                                                     | KR02N0                 | Taraborrelli (2014)  |
| G41351t2 | TrGC   | LISOPEFO2 + HO <sub>2</sub> → .7143 MACR + .2857 MVK + HCHO + HO <sub>2</sub>                                                                                                                                                                                                                                                                                                                                                                                                                                                                                                          | KR02H02*0.706          | Taraborrelli (2014)  |
| G41361   | TrGC   | LISOPEFO2 + NO <sub>3</sub> → .7143 MACR + .2857 MVK + HCHO + HO <sub>2</sub> + NO <sub>2</sub>                                                                                                                                                                                                                                                                                                                                                                                                                                                                                        | KR02N03                | Taraborrelli (2014)  |
| G41378   | TrGC   | LISOPEFO2 → PEROXYRINGC2O2                                                                                                                                                                                                                                                                                                                                                                                                                                                                                                                                                             | 9.39E9*EXP(-7322/temp) | Taraborrelli (2014)  |
| G41341t2 | TrGC   | LISOPEFO2 → .7143 MACR + .2857 MVK + HCHO + OH                                                                                                                                                                                                                                                                                                                                                                                                                                                                                                                                         | .7143*KHSD+.2857*KHSB  | Taraborrelli (2014)  |
| G413112  | TrGC   | PEROXYRINGC2O2 → CH <sub>3</sub> COCH <sub>2</sub> OOCH <sub>2</sub> CHO + HO <sub>2</sub>                                                                                                                                                                                                                                                                                                                                                                                                                                                                                             | 8.00E-13*R02           | Taraborrelli (2014)  |
| G413416  | TrGC   | PEROXYRINGC2O2 + NO → CH <sub>3</sub> COCH <sub>2</sub> OOCH <sub>2</sub> CHO + HO <sub>2</sub> + NO <sub>2</sub>                                                                                                                                                                                                                                                                                                                                                                                                                                                                      | KR02N0                 | Taraborrelli (2014)* |
| G413519  | TrGC   | PEROXYRINGC2O2 + HO <sub>2</sub> → PEROXYRINGC2OOH                                                                                                                                                                                                                                                                                                                                                                                                                                                                                                                                     | KR02H02*0.706          | Taraborrelli (2014)  |
| G413618  | TrGC   | PEROXYRINGC2O2 + NO <sub>3</sub> → CH <sub>3</sub> COCH <sub>2</sub> OOCH <sub>2</sub> CHO + HO <sub>2</sub> + NO <sub>2</sub>                                                                                                                                                                                                                                                                                                                                                                                                                                                         | KR02N03                | Taraborrelli (2014)  |
| G413417  | TrGC   | PEROXYRINGC2O2 → CH <sub>3</sub> COCH <sub>2</sub> OOCH <sub>2</sub> CHO + OH                                                                                                                                                                                                                                                                                                                                                                                                                                                                                                          | KHSB                   | Taraborrelli (2014)  |

Table 1: Gas phase reactions (... continued)

| #        | labels | reaction                                                                                                                | rate coefficient           | reference                                       |
|----------|--------|-------------------------------------------------------------------------------------------------------------------------|----------------------------|-------------------------------------------------|
| G413619  | TrGC   | PEROXYRINGC2OOH + OH → PEROXYRINGC2O2                                                                                   | 0.6*k_CH300H_OH            | Taraborrelli (2014)                             |
| G413621  | TrGC   | PEROXYRINGC2OOH + OH → MGLYOX + 2 CO + 2 HO <sub>2</sub>                                                                | kt*ftoh*falk*fpch2oh       | Taraborrelli (2014)*                            |
| G413622  | TrGC   | PEROXYRINGC2OOH + OH → .8405 HCHO + .8405 OH + .8405 CO2H3CHO + .1595 C1ODC2OOHC4OD + .1595 HO <sub>2</sub>             | ks*fsoh*falk+ks*fsooh*falk | Taraborrelli (2014)                             |
| G4136    | TrGC   | CH3COCH2OOCH2CHO + OH → CH <sub>3</sub> C(O)OO + CO <sub>2</sub> + 2 HCHO                                               | kt*fo*ftch2oh              | Taraborrelli (2014)*                            |
| G413610  | TrGC   | CH3COCH2OOCH2CHO + OH → GLYOX + CH <sub>3</sub> C(O)OO + HCHO                                                           | ks*fcho*fsooh              | Taraborrelli (2014)                             |
| G41361t2 | TrGC   | CH3COCH2OOCH2CHO + OH → MGLYOX + GLYOX + HO <sub>2</sub>                                                                | ks*fco*fsooh               | Taraborrelli (2014)                             |
| G45mbo1  | TrGC   | MBO + OH → LMBOABO2                                                                                                     | 8.1E-12*EXP(610/TEMP)      | Rickard and Pascoe (2009), Taraborrelli (2014)  |
| G45mbo2  | TrGC   | MBO + O <sub>3</sub> → HCHO + .16 CH <sub>3</sub> COCH <sub>3</sub> + .16 HO <sub>2</sub> + .16 CO + .16 OH + .84 MBOOO | 1.0E-17*0.57               | Rickard and Pascoe (2009), Taraborrelli (2014)  |
| G45mbo3  | TrGC   | MBO + O <sub>3</sub> → IBUTALOH + .63 CO + .37 HOCH2OOH + .16 OH + .16 HO <sub>2</sub>                                  | 1.0E-17*0.43               | Rickard and Pascoe (2009), Taraborrelli (2014)  |
| G45mbo4  | TrGC   | MBO + NO <sub>3</sub> → LNMBOABO2                                                                                       | 4.6E-14*EXP(-400/TEMP)     | Rickard and Pascoe (2009), Taraborrelli (2014)  |
| G45mbo5  | TrGC   | LMBOABO2 + HO <sub>2</sub> → LMBOABOOH                                                                                  | KR02H02*0.706              | Rickard and Pascoe (2009), Taraborrelli (2014)  |
| G45mbo6  | TrGC   | LMBOABO2 + NO → LMBOABNO3                                                                                               | KR02N0*(0.064+0.026)/2.    | Rickard and Pascoe (2009), Taraborrelli (2014)  |
| G45mbo7  | TrGC   | LMBOABO2 + NO → HOCH <sub>2</sub> CHO + CH <sub>3</sub> COCH <sub>3</sub> + HO <sub>2</sub> + NO <sub>2</sub>           | KR02N0*(0.936+0.974)/2*.67 | Rickard and Pascoe (2009), Taraborrelli (2014)  |
| G45mbo8  | TrGC   | LMBOABO2 + NO → IBUTALOH + HCHO + HO <sub>2</sub> + NO <sub>2</sub>                                                     | KR02N0*(0.936+0.974)/2*.33 | Rickard and Pascoe (2009), Taraborrelli (2014)  |
| G45mbo9  | TrGC   | LMBOABO2 → HOCH <sub>2</sub> CHO + CH <sub>3</sub> COCH <sub>3</sub> + HO <sub>2</sub>                                  | 8.8E-13*R02*.67            | Rickard and Pascoe (2009), Taraborrelli (2014)  |
| G45mbo10 | TrGC   | LMBOABO2 → IBUTALOH + HCHO + HO <sub>2</sub>                                                                            | 8.8E-13*R02*.33            | Rickard and Pascoe (2009), Taraborrelli (2014)  |
| G45mbo11 | TrGC   | LMBOABOOH + OH → MBOACO + OH                                                                                            | .67*2.93E-11+.33*2.05E-12  | Rickard and Pascoe (2009), Taraborrelli (2014)* |

Table 1: Gas phase reactions (... continued)

| #        | labels | reaction                                                                                                                                                                   | rate coefficient          | reference                                       |
|----------|--------|----------------------------------------------------------------------------------------------------------------------------------------------------------------------------|---------------------------|-------------------------------------------------|
| G45mbo12 | TrGC   | LMBOABOOH + OH $\rightarrow$ LMBOABO2                                                                                                                                      | .6*k_CH300H_OH            | Rickard and Pascoe (2009), Taraborrelli (2014)  |
| G45mbo13 | TrGC   | LMBOABOOH + h $\nu$ $\rightarrow$ HOCH <sub>2</sub> CHO + CH <sub>3</sub> COCH <sub>3</sub> + HO <sub>2</sub> + OH                                                         | 1.14*jx(ip_CH300H)*.67    | Rickard and Pascoe (2009), Taraborrelli (2014)  |
| G45mbo14 | TrGC   | LMBOABOOH + h $\nu$ $\rightarrow$ IBUTALOH + HCHO + HO <sub>2</sub> + OH                                                                                                   | 1.14*jx(ip_CH300H)*.33    | Rickard and Pascoe (2009), Taraborrelli (2014)  |
| G45mbo15 | TrGC   | LMBOABNO3 + OH $\rightarrow$ MBOACO + NO <sub>2</sub>                                                                                                                      | .67*1.75E-12+.33*2.69E-12 | Rickard and Pascoe (2009), Taraborrelli (2014)* |
| G45mbo16 | TrGC   | MBOACO + OH $\rightarrow$ MBOCOCO + HO <sub>2</sub>                                                                                                                        | 3.79E-12                  | Rickard and Pascoe (2009)                       |
| G45mbo17 | TrGC   | MBOACO + h $\nu$ $\rightarrow$ HCHO + HO <sub>2</sub> + IPRHOCO3                                                                                                           | J_ACETOL                  | Rickard and Pascoe (2009)                       |
| G45mbo18 | TrGC   | MBOCOCO + OH $\rightarrow$ CO + IPRHOCO3                                                                                                                                   | 1.38E-11                  | Rickard and Pascoe (2009)                       |
| G45mbo19 | TrGC   | MBOCOCO + h $\nu$ $\rightarrow$ CO + HO <sub>2</sub> + IPRHOCO3                                                                                                            | jx(ip_MGLY0X)             | Rickard and Pascoe (2009)                       |
| G45mbo20 | TrGC   | IBUTALOH + OH $\rightarrow$ IPRHOCO3                                                                                                                                       | 1.4E-11                   | Rickard and Pascoe (2009)                       |
| G45mbo21 | TrGC   | IBUTALOH + h $\nu$ $\rightarrow$ CH <sub>3</sub> COCH <sub>3</sub> + HO <sub>2</sub> + HO <sub>2</sub> + CO                                                                | J_ACETOL                  | Rickard and Pascoe (2009)                       |
| G45mbo22 | TrGC   | IPRHOCO3 + HO <sub>2</sub> $\rightarrow$ CH <sub>3</sub> COCH <sub>3</sub> + HO <sub>2</sub> + OH                                                                          | KAPH02*rco3_oh            | Rickard and Pascoe (2009), Taraborrelli (2014)  |
| G45mbo23 | TrGC   | IPRHOCO3 + HO <sub>2</sub> $\rightarrow$ IPRHOCO2H + O <sub>3</sub>                                                                                                        | KAPH02*rco3_o3            | Rickard and Pascoe (2009), Taraborrelli (2014)  |
| G45mbo24 | TrGC   | IPRHOCO3 + HO <sub>2</sub> $\rightarrow$ IPRHOCO3H                                                                                                                         | KAPH02*rco3_ooh           | Rickard and Pascoe (2009), Taraborrelli (2014)  |
| G45mbo25 | TrGC   | IPRHOCO3 + NO $\rightarrow$ CH <sub>3</sub> COCH <sub>3</sub> + HO <sub>2</sub> + NO <sub>2</sub>                                                                          | KAPNO                     | Rickard and Pascoe (2009)                       |
| G45mbo26 | TrGC   | IPRHOCO3 + NO <sub>2</sub> $\rightarrow$ C4PAN5                                                                                                                            | k_CH3C03_NO2              | Rickard and Pascoe (2009)                       |
| G45mbo27 | TrGC   | IPRHOCO3 + NO <sub>3</sub> $\rightarrow$ CH <sub>3</sub> COCH <sub>3</sub> + HO <sub>2</sub> + NO <sub>2</sub>                                                             | KR02N03*1.74              | Rickard and Pascoe (2009)                       |
| G45mbo28 | TrGC   | IPRHOCO3 $\rightarrow$ CH <sub>3</sub> COCH <sub>3</sub> + HO <sub>2</sub>                                                                                                 | 1.00E-11*R02*0.7          | Rickard and Pascoe (2009)                       |
| G45mbo29 | TrGC   | IPRHOCO3 $\rightarrow$ IPRHOCO2H                                                                                                                                           | 1.00E-11*R02*0.3          | Rickard and Pascoe (2009)                       |
| G45mbo30 | TrGC   | IPRHOCO2H + OH $\rightarrow$ CH <sub>3</sub> COCH <sub>3</sub> + HO <sub>2</sub>                                                                                           | 1.72E-12                  | Rickard and Pascoe (2009)                       |
| G45mbo31 | TrGC   | IPRHOCO3H + h $\nu$ $\rightarrow$ CH <sub>3</sub> COCH <sub>3</sub> + HO <sub>2</sub> + OH                                                                                 | 1.14*jx(ip_CH300H)        | Rickard and Pascoe (2009)                       |
| G45mbo32 | TrGC   | OH + IPRHOCO3H $\rightarrow$ IPRHOCO3                                                                                                                                      | 4.80E-12                  | Rickard and Pascoe (2009)                       |
| G45mbo33 | TrGC   | C4PAN5 $\rightarrow$ IPRHOCO3 + NO <sub>2</sub>                                                                                                                            | K_PAN_M                   | Rickard and Pascoe (2009)                       |
| G45mbo34 | TrGC   | C4PAN5 + OH $\rightarrow$ CH <sub>3</sub> COCH <sub>3</sub> + CO + NO <sub>2</sub>                                                                                         | 4.75E-13                  | Rickard and Pascoe (2009)                       |
| G45mbo35 | TrGC   | LNMB0ABO2 + HO <sub>2</sub> $\rightarrow$ LNMB0ABOOH                                                                                                                       | KR02H02*0.706             | Rickard and Pascoe (2009), Taraborrelli (2014)  |
| G45mbo36 | TrGC   | LNMB0ABO2 + NO $\rightarrow$ .65 NO3CH2CHO + .65 CH <sub>3</sub> COCH <sub>3</sub> + .65 HO <sub>2</sub> + .35 IBUTALOH + .35 HCHO + .35 NO <sub>2</sub> + NO <sub>2</sub> | KR02N0                    | Rickard and Pascoe (2009), Taraborrelli (2014)  |

Table 1: Gas phase reactions (... continued)

| #        | labels | reaction                                                                                                                                                                                         | rate coefficient                                                      | reference                                       |
|----------|--------|--------------------------------------------------------------------------------------------------------------------------------------------------------------------------------------------------|-----------------------------------------------------------------------|-------------------------------------------------|
| G45mbo37 | TrGC   | $\text{LNMBOABO2} + \text{NO}_3 \rightarrow .65 \text{ NO3CH2CHO} + .65 \text{ CH}_3\text{COCH}_3 + .65 \text{ HO}_2 + .35 \text{ IBUTALOH} + .35 \text{ HCHO} + .35 \text{ NO}_2 + \text{NO}_2$ | KR02N03                                                               | Rickard and Pascoe (2009), Taraborrelli (2014)  |
| G45mbo38 | TrGC   | $\text{LNMBOABO2} \rightarrow .65 \text{ NO3CH2CHO} + .65 \text{ CH}_3\text{COCH}_3 + .65 \text{ HO}_2 + .35 \text{ IBUTALOH} + .35 \text{ HCHO} + .35 \text{ NO}_2$                             | $8.8\text{E-}13 \cdot \text{R02}$                                     | Rickard and Pascoe (2009), Taraborrelli (2014)  |
| G45mbo39 | TrGC   | $\text{LNMBOABOOH} + \text{OH} \rightarrow .65 \text{ C4MCONO3OH} + .35 \text{ NMBOBCO} + \text{OH}$                                                                                             | $.65 \cdot 4.89\text{E-}12 + .35 \cdot 2.52\text{E-}12$               | Rickard and Pascoe (2009), Taraborrelli (2014)  |
| G45mbo40 | TrGC   | $\text{LNMBOABOOH} + \text{OH} \rightarrow \text{LNMBOABO2}$                                                                                                                                     | $.6 \cdot k_{\text{CH300H\_OH}}$                                      | Rickard and Pascoe (2009), Taraborrelli (2014)  |
| G45mbo41 | TrGC   | $\text{LNMBOABOOH} + h\nu \rightarrow \text{NO3CH2CHO} + \text{CH}_3\text{COCH}_3 + \text{HO}_2 + \text{OH}$                                                                                     | $1.14 \cdot j_x(\text{ip\_CH300H}) \cdot .65$                         | Rickard and Pascoe (2009), Taraborrelli (2014)  |
| G45mbo42 | TrGC   | $\text{LNMBOABOOH} + h\nu \rightarrow \text{IBUTALOH} + \text{HCHO} + \text{NO}_2 + \text{OH}$                                                                                                   | $1.14 \cdot j_x(\text{ip\_CH300H}) \cdot .35$                         | Rickard and Pascoe (2009), Taraborrelli (2014)  |
| G45mbo43 | TrGC   | $\text{C4MCONO3OH} + \text{OH} \rightarrow \text{CH}_3\text{COCH}_3 + \text{HCHO} + \text{CO}_2 + \text{NO}_2$                                                                                   | $1.23\text{E-}12$                                                     | Rickard and Pascoe (2009), Taraborrelli (2014)* |
| G45mbo44 | TrGC   | $\text{NMBOBCO} + \text{OH} \rightarrow \text{NC4OHCO3}$                                                                                                                                         | $4.26\text{E-}12$                                                     | Rickard and Pascoe (2009)                       |
| G45mbo45 | TrGC   | $\text{NC4OHCO3} + \text{HO}_2 \rightarrow \text{IBUTALOH} + \text{NO}_2 + \text{OH}$                                                                                                            | KAPH02* $\text{rco3\_oh}$                                             | Rickard and Pascoe (2009), Taraborrelli (2014)  |
| G45mbo46 | TrGC   | $\text{NC4OHCO3} + \text{HO}_2 \rightarrow \text{NC4OHCO3H}$                                                                                                                                     | KAPH02*( $\text{rco3\_o3} + \text{rco3\_ooh}$ )                       | Rickard and Pascoe (2009), Taraborrelli (2014)  |
| G45mbo47 | TrGC   | $\text{NC4OHCO3} + \text{NO} \rightarrow \text{IBUTALOH} + \text{NO}_2 + \text{NO}_2$                                                                                                            | KAPN0                                                                 | Rickard and Pascoe (2009)                       |
| G45mbo48 | TrGC   | $\text{NC4OHCO3} + \text{NO}_2 \rightarrow \text{NC4OHCPAN}$                                                                                                                                     | $k_{\text{CH3C03\_N02}}$                                              | Rickard and Pascoe (2009)                       |
| G45mbo49 | TrGC   | $\text{NC4OHCO3} + \text{NO}_3 \rightarrow \text{IBUTALOH} + \text{NO}_2 + \text{NO}_2$                                                                                                          | $\text{KR02N03} \cdot 1.74$                                           | Rickard and Pascoe (2009)                       |
| G45mbo50 | TrGC   | $\text{NC4OHCO3} \rightarrow \text{IBUTALOH} + \text{NO}_2$                                                                                                                                      | $1.00\text{E-}11 \cdot \text{R02}$                                    | Rickard and Pascoe (2009)                       |
| G45mbo51 | TrGC   | $\text{NC4OHCO3H} + \text{OH} \rightarrow \text{NC4OHCO3}$                                                                                                                                       | $4.50\text{E-}12$                                                     | Rickard and Pascoe (2009)                       |
| G45mbo52 | TrGC   | $\text{NC4OHCO3H} \rightarrow \text{IBUTALOH} + \text{NO}_2 + \text{OH}$                                                                                                                         | $1.14 \cdot j_x(\text{ip\_CH300H})$                                   | Rickard and Pascoe (2009)                       |
| G45mbo53 | TrGC   | $\text{NC4OHCPAN} + \text{OH} \rightarrow \text{IBUTALOH} + \text{CO} + \text{NO}_2 + \text{NO}_2$                                                                                               | $1.27\text{E-}12$                                                     | Rickard and Pascoe (2009)                       |
| G45mbo54 | TrGC   | $\text{NC4OHCPAN} \rightarrow \text{NC4OHCO3} + \text{NO}_2$                                                                                                                                     | K_PAN_M                                                               | Rickard and Pascoe (2009)                       |
| G45mbo55 | TrGC   | $\text{MBOOO} \rightarrow \text{IPRHOCO2H}$                                                                                                                                                      | $1.60\text{E-}17 \cdot \text{C}(\text{ind\_H2O}) \cdot (0.08 + 0.15)$ | Rickard and Pascoe (2009), Taraborrelli (2014)  |
| G45mbo56 | TrGC   | $\text{MBOOO} \rightarrow \text{IBUTALOH} + \text{H}_2\text{O}_2$                                                                                                                                | $1.60\text{E-}17 \cdot \text{C}(\text{ind\_H2O}) \cdot 0.77$          | Rickard and Pascoe (2009), Taraborrelli (2014)  |
| G45mbo57 | TrGC   | $\text{MBOOO} + \text{CO} \rightarrow \text{IBUTALOH}$                                                                                                                                           | $1.20\text{E-}15$                                                     | Rickard and Pascoe (2009)                       |
| G45mbo58 | TrGC   | $\text{MBOOO} + \text{NO} \rightarrow \text{IBUTALOH} + \text{NO}_2$                                                                                                                             | $1.00\text{E-}14$                                                     | Rickard and Pascoe (2009)                       |
| G45mbo59 | TrGC   | $\text{MBOOO} + \text{NO}_2 \rightarrow \text{IBUTALOH} + \text{NO}_3$                                                                                                                           | $1.00\text{E-}15$                                                     | Rickard and Pascoe (2009)                       |

Table 1: Gas phase reactions (... continued)

| #          | labels | reaction                                                                                    | rate coefficient                 | reference                                      |
|------------|--------|---------------------------------------------------------------------------------------------|----------------------------------|------------------------------------------------|
| G45mbo60   | TrGC   | MBOOO + SO <sub>2</sub> → IBUTALOH + H <sub>2</sub> SO <sub>4</sub>                         | 7.00E-14                         | Rickard and Pascoe (2009)                      |
| G410apin1  | TrGC   | APINENE + OH → LAPINABO2                                                                    | 1.47E-11*EXP(467/TEMP)*(.50+.25) | Vereecken et al. (2007), Taraborrelli (2014)*  |
| G410apin2  | TrGC   | APINENE + OH → MENTHEN6ONE + HO <sub>2</sub>                                                | 1.47E-11*EXP(467/TEMP)*.25*.60   | Vereecken et al. (2007), Taraborrelli (2014)*  |
| G410apin3  | TrGC   | APINENE + OH → LVROO6R1O2                                                                   | 1.47E-11*EXP(467/TEMP)*.25*.40   | Vereecken et al. (2007), Taraborrelli (2014)*  |
| G410apin4  | TrGC   | LAPINABO2 + NO → PINAL + HO <sub>2</sub> + NO <sub>2</sub>                                  | KR02N0*0.770                     | Rickard and Pascoe (2009), Taraborrelli (2014) |
| G410apin5  | TrGC   | LAPINABO2 + NO → LAPINABNO3                                                                 | KR02N0*0.230                     | Rickard and Pascoe (2009), Taraborrelli (2014) |
| G410apin6  | TrGC   | LAPINABO2 + HO <sub>2</sub> → LAPINABOOH                                                    | KR02H02*0.914                    | Rickard and Pascoe (2009), Taraborrelli (2014) |
| G410apin7  | TrGC   | LAPINABO2 → PINAL + HO <sub>2</sub>                                                         | R02*(.33*9.20E-14+.67*8.80E-13)  | Rickard and Pascoe (2009), Taraborrelli (2014) |
| G410apin9  | TrGC   | LAPINABOOH + OH → .33 LAPINABO2 + .67 C96CO3                                                | .33*1.83E-11+.67*3.28E-11        | Rickard and Pascoe (2009), Taraborrelli (2014) |
| G410apin10 | TrGC   | LAPINABOOH + hν → PINAL + HO <sub>2</sub> + OH                                              | 1.14*jx(ip_CH300H)               | Rickard and Pascoe (2009), Taraborrelli (2014) |
| G410apin11 | TrGC   | LAPINABNO3 + OH → .33 PINAL + .67 C96CO3 + NO <sub>2</sub>                                  | .33*5.50E-12+.67*3.64E-12        | Rickard and Pascoe (2009), Taraborrelli (2014) |
| G410apin12 | TrGC   | MENTHEN6ONE + OH → OHMENTHEN6ONEO2                                                          | (kads+kadt)*acoch3               | Vereecken et al. (2007), Taraborrelli (2014)   |
| G410apin13 | TrGC   | MENTHEN6ONE + hν → LVRO6R1O2 + OH                                                           | 1.14*jx(ip_CH300H)               | Vereecken et al. (2007), Taraborrelli (2014)   |
| G410apin14 | TrGC   | OHMENTHEN6ONEO2 + NO →                                                                      | KR02N0                           | Vereecken et al. (2007), Taraborrelli (2014)   |
| G410apin15 | TrGC   | LV2OHMENTHEN6ONE + HO <sub>2</sub> + NO <sub>2</sub><br>OHMENTHEN6ONEO2 + HO <sub>2</sub> → | KR02H02*0.914                    | Vereecken et al. (2007), Taraborrelli (2014)   |
| G410apin16 | TrGC   | LV2OHMENTHEN6ONE<br>OHMENTHEN6ONEO2 → LV2OHMENTHEN6ONE +                                    | R02*9.20E-14                     | Vereecken et al. (2007), Taraborrelli (2014)   |
| G410apin17 | TrGC   | HO <sub>2</sub><br>LV2OHMENTHEN6ONE + OH → LCARBON                                          | 1E-11                            | Vereecken et al. (2007), Taraborrelli (2014)   |
| G410apin18 | TrGC   | LV2OHMENTHEN6ONE + hν → LCARBON + OH                                                        | 1.14*jx(ip_CH300H)               | Vereecken et al. (2007), Taraborrelli (2014)   |

Table 1: Gas phase reactions (... continued)

| #            | labels | reaction                                                        | rate coefficient | reference                                         |
|--------------|--------|-----------------------------------------------------------------|------------------|---------------------------------------------------|
| G410apin18t2 | TrGC   | PINAL + OH $\rightarrow$ C96CO3                                 | 4.20E-11*0.772   | Rickard and Pascoe (2009),<br>Taraborrelli (2014) |
| G410apin19   | TrGC   | PINAL + OH $\rightarrow$ PINALO2                                | 4.20E-11*0.228   | Rickard and Pascoe (2009),<br>Taraborrelli (2014) |
| G410apin20   | TrGC   | PINAL $\rightarrow$ C96O2 + CO + HO <sub>2</sub>                | jx(ip_HOCH2CHO)  | Rickard and Pascoe (2009),<br>Taraborrelli (2014) |
| G410apin21   | TrGC   | PINAL + NO <sub>3</sub> $\rightarrow$ C96CO3 + HNO <sub>3</sub> | 3.80E-14         | Rickard and Pascoe (2009),<br>Taraborrelli (2014) |
| G410apin     | TrGC   | C96CO3 $\rightarrow$ 0.3 PINONIC + 0.7 C96O2                    | 1.00E-11*R02     | Rickard and Pascoe (2009),<br>Taraborrelli (2014) |
| G410apint2   | TrGC   | C96CO3 + HO <sub>2</sub> $\rightarrow$ PERPINONIC               | KAPH02*rco3_ooh  | Rickard and Pascoe (2009),<br>Taraborrelli (2014) |
| G410apint3   | TrGC   | C96CO3 + HO <sub>2</sub> $\rightarrow$ PINONIC + O <sub>3</sub> | KAPH02*rco3_o3   | Rickard and Pascoe (2009),<br>Taraborrelli (2014) |
| G410apint4   | TrGC   | C96CO3 + HO <sub>2</sub> $\rightarrow$ C96O2 + OH               | KAPH02*rco3_oh   | Rickard and Pascoe (2009),<br>Taraborrelli (2014) |
| G410apint5   | TrGC   | C96CO3 + NO <sub>2</sub> $\rightarrow$ C10PAN2                  | k_CH3C03_N02     | Rickard and Pascoe (2009),<br>Taraborrelli (2014) |
| G410apint6   | TrGC   | C96CO3 + NO $\rightarrow$ C96O2 + NO <sub>2</sub>               | KAPN0            | Rickard and Pascoe (2009),<br>Taraborrelli (2014) |
| G410apint7   | TrGC   | C96CO3 + NO <sub>3</sub> $\rightarrow$ C96O2 + NO <sub>2</sub>  | KR02N03*1.60     | Rickard and Pascoe (2009),<br>Taraborrelli (2014) |
| G410apint8   | TrGC   | C10PAN2 $\rightarrow$ C96CO3 + NO <sub>2</sub>                  | k_PAN_M          | Rickard and Pascoe (2009),<br>Taraborrelli (2014) |
| G410apint9   | TrGC   | C10PAN2 + OH $\rightarrow$ NORPINAL + CO + NO <sub>2</sub>      | 3.66E-12         | Rickard and Pascoe (2009),<br>Taraborrelli (2014) |
| G410apint10  | TrGC   | C96O2 $\rightarrow$ C97O2                                       | 1.30E-12*R02     | Rickard and Pascoe (2009),<br>Taraborrelli (2014) |
| G410apint11  | TrGC   | C96O2 + NO $\rightarrow$ C96NO3                                 | KR02N0*0.157     | Rickard and Pascoe (2009),<br>Taraborrelli (2014) |
| G410apint12  | TrGC   | C96O2 + HO <sub>2</sub> $\rightarrow$ C96OOH                    | KR02H02*0.890    | Rickard and Pascoe (2009),<br>Taraborrelli (2014) |
| G410apint13  | TrGC   | C96O2 + NO $\rightarrow$ C97O2 + NO <sub>2</sub>                | KR02N0*0.843     | Rickard and Pascoe (2009),<br>Taraborrelli (2014) |

Table 1: Gas phase reactions (... continued)

| #           | labels | reaction                                                                                      | rate coefficient                      | reference                                         |
|-------------|--------|-----------------------------------------------------------------------------------------------|---------------------------------------|---------------------------------------------------|
| G410apint14 | TrGC   | $\text{C96NO3} + h\nu \rightarrow \text{C97O2} + \text{NO}_2$                                 | J_IC3H7N03+J_ACETOL                   | Rickard and Pascoe (2009),<br>Taraborrelli (2014) |
| G410apint15 | TrGC   | $\text{C96NO3} + \text{OH} \rightarrow \text{NORPINAL} + \text{NO}_2$                         | 2.88E-12                              | Rickard and Pascoe (2009),<br>Taraborrelli (2014) |
| G410apint16 | TrGC   | $\text{C96OOH} + h\nu \rightarrow \text{C97O2} + \text{OH}$                                   | 1.14*jx(ip_CH300H)+J_ACETOL           | Rickard and Pascoe (2009),<br>Taraborrelli (2014) |
| G410apint17 | TrGC   | $\text{C96OOH} + \text{OH} \rightarrow \text{C96O2}$                                          | 1.90E-12*EXP(190/TEMP)                | Rickard and Pascoe (2009),<br>Taraborrelli (2014) |
| G410apint18 | TrGC   | $\text{C96OOH} + \text{OH} \rightarrow \text{NORPINAL} + \text{OH}$                           | 1.30E-11                              | Rickard and Pascoe (2009),<br>Taraborrelli (2014) |
| G410apint19 | TrGC   | $\text{C97O2} \rightarrow \text{C98O2}$                                                       | 6.70E-15*R02                          | Rickard and Pascoe (2009),<br>Taraborrelli (2014) |
| G410apint20 | TrGC   | $\text{C97O2} + \text{NO} \rightarrow \text{C98O2} + \text{NO}_2$                             | KR02N0                                | Rickard and Pascoe (2009),<br>Taraborrelli (2014) |
| G410apint21 | TrGC   | $\text{C97O2} + \text{HO}_2 \rightarrow \text{C97OOH}$                                        | KR02H02*0.890                         | Rickard and Pascoe (2009),<br>Taraborrelli (2014) |
| G410apint22 | TrGC   | $\text{C97OOH} + h\nu \rightarrow \text{C98O2} + \text{OH}$                                   | 1.14*jx(ip_CH300H)+J_ACETOL           | Rickard and Pascoe (2009),<br>Taraborrelli (2014) |
| G410apint23 | TrGC   | $\text{C97OOH} + \text{OH} \rightarrow \text{C97O2}$                                          | 1.05E-11                              | Rickard and Pascoe (2009),<br>Taraborrelli (2014) |
| G410apint24 | TrGC   | $\text{C98O2} \rightarrow \text{C614O2} + \text{CH}_3\text{COCH}_3$                           | 6.70E-15*R02                          | Rickard and Pascoe (2009),<br>Taraborrelli (2014) |
| G410apint25 | TrGC   | $\text{C98O2} + \text{NO} \rightarrow \text{C98NO3}$                                          | KR02N0*0.118                          | Rickard and Pascoe (2009),<br>Taraborrelli (2014) |
| G410apint26 | TrGC   | $\text{C98O2} + \text{NO} \rightarrow \text{C614O2} + \text{CH}_3\text{COCH}_3 + \text{NO}_2$ | KR02N0*0.882                          | Rickard and Pascoe (2009),<br>Taraborrelli (2014) |
| G410apint27 | TrGC   | $\text{C98O2} + \text{HO}_2 \rightarrow \text{C98OOH}$                                        | KR02H02*0.890                         | Rickard and Pascoe (2009),<br>Taraborrelli (2014) |
| G410apint28 | TrGC   | $\text{C98OOH} + h\nu \rightarrow \text{C614O2} + \text{CH}_3\text{COCH}_3 + \text{OH}$       | 1.14*jx(ip_CH300H)+2.15*jx(ip_MGLY0X) | Rickard and Pascoe (2009),<br>Taraborrelli (2014) |
| G410apint29 | TrGC   | $\text{C98OOH} + \text{OH} \rightarrow \text{C98O2}$                                          | 2.05E-11                              | Rickard and Pascoe (2009),<br>Taraborrelli (2014) |
| G410apint30 | TrGC   | $\text{PINONIC} + \text{OH} \rightarrow \text{C96O2}$                                         | 6.65E-12                              | Rickard and Pascoe (2009),<br>Taraborrelli (2014) |



Table 1: Gas phase reactions (... continued)

| #           | labels | reaction                                                           | rate coefficient            | reference                                         |
|-------------|--------|--------------------------------------------------------------------|-----------------------------|---------------------------------------------------|
| G410apint31 | TrGC   | PINONIC + $h\nu \rightarrow$ C96O2 + HO <sub>2</sub>               | J_ACETOL                    | Rickard and Pascoe (2009),<br>Taraborrelli (2014) |
| G410apint32 | TrGC   | NORPINAL + OH $\rightarrow$ C85CO3                                 | 2.64E-11                    | Rickard and Pascoe (2009),<br>Taraborrelli (2014) |
| G410apint33 | TrGC   | NORPINAL + $h\nu \rightarrow$ C85O2 + CO + HO <sub>2</sub>         | jx(ip_HOCH2CHO)             | Rickard and Pascoe (2009),<br>Taraborrelli (2014) |
| G410apint34 | TrGC   | NORPINAL + NO <sub>3</sub> $\rightarrow$ C85CO3 + HNO <sub>3</sub> | KN03AL*8.5                  | Rickard and Pascoe (2009),<br>Taraborrelli (2014) |
| G410apint35 | TrGC   | PERPINONIC + $h\nu \rightarrow$ C96O2 + OH                         | 1.14*jx(ip_CH300H)+J_ACETOL | Rickard and Pascoe (2009),<br>Taraborrelli (2014) |
| G410apint36 | TrGC   | PERPINONIC + OH $\rightarrow$ C96CO3                               | 9.73E-12                    | Rickard and Pascoe (2009),<br>Taraborrelli (2014) |
| G410apint37 | TrGC   | C85CO3 $\rightarrow$ C85O2                                         | 1.00E-11*R02                | Rickard and Pascoe (2009),<br>Taraborrelli (2014) |
| G410apint38 | TrGC   | C85CO3 + NO $\rightarrow$ C85O2 + NO <sub>2</sub>                  | KAPNO                       | Rickard and Pascoe (2009),<br>Taraborrelli (2014) |
| G410apint39 | TrGC   | C85CO3 + NO <sub>2</sub> $\rightarrow$ C9PAN2                      | k_CH3CO3_NO2                | Rickard and Pascoe (2009),<br>Taraborrelli (2014) |
| G410apint40 | TrGC   | C85CO3 + HO <sub>2</sub> $\rightarrow$ C85CO3H                     | KAPH02*(rco3_ooh+rco3_o3)   | Rickard and Pascoe (2009),<br>Taraborrelli (2014) |
| G410apint41 | TrGC   | C85CO3 + HO <sub>2</sub> $\rightarrow$ C85O2 + OH                  | KAPH02*rco3_oh              | Rickard and Pascoe (2009),<br>Taraborrelli (2014) |
| G410apint42 | TrGC   | C85O2 $\rightarrow$ C86O2                                          | 6.70E-15*R02                | Rickard and Pascoe (2009),<br>Taraborrelli (2014) |
| G410apint43 | TrGC   | C85O2 + HO <sub>2</sub> $\rightarrow$ C85OOH                       | KR02H02*0.859               | Rickard and Pascoe (2009),<br>Taraborrelli (2014) |
| G410apint44 | TrGC   | C85O2 + NO $\rightarrow$ C86O2 + NO <sub>2</sub>                   | KR02NO                      | Rickard and Pascoe (2009),<br>Taraborrelli (2014) |
| G410apint45 | TrGC   | C9PAN2 $\rightarrow$ C85CO3 + NO <sub>2</sub>                      | k_PAN_M                     | Rickard and Pascoe (2009),<br>Taraborrelli (2014) |
| G410apint46 | TrGC   | C9PAN2 + OH $\rightarrow$ C85OOH + CO + NO <sub>2</sub>            | 6.60E-12                    | Rickard and Pascoe (2009),<br>Taraborrelli (2014) |
| G410apint47 | TrGC   | C85CO3H $\rightarrow$ C85O2 + OH                                   | 1.14*jx(ip_CH300H)+J_ACETOL | Rickard and Pascoe (2009),<br>Taraborrelli (2014) |

Table 1: Gas phase reactions (... continued)

| #           | labels | reaction                                                                                             | rate coefficient                    | reference                                      |
|-------------|--------|------------------------------------------------------------------------------------------------------|-------------------------------------|------------------------------------------------|
| G410apint48 | TrGC   | $\text{C85CO3H} + \text{OH} \rightarrow \text{C85CO3}$                                               | 1.02E-11                            | Rickard and Pascoe (2009), Taraborrelli (2014) |
| G410apint49 | TrGC   | $\text{C85OOH} + h\nu \rightarrow \text{C86O2} + \text{OH}$                                          | 1.14*jx(ip_CH300H)+J_ACETOL         | Rickard and Pascoe (2009), Taraborrelli (2014) |
| G410apint50 | TrGC   | $\text{C85OOH} + \text{OH} \rightarrow \text{C85O2}$                                                 | 1.29E-11                            | Rickard and Pascoe (2009), Taraborrelli (2014) |
| G410apint51 | TrGC   | $\text{C86O2} \rightarrow \text{C511O2} + \text{CH}_3\text{COCH}_3$                                  | 6.70E-15*R02                        | Rickard and Pascoe (2009), Taraborrelli (2014) |
| G410apint52 | TrGC   | $\text{C86O2} + \text{NO} \rightarrow \text{C511O2} + \text{CH}_3\text{COCH}_3 + \text{NO}_2$        | KR02N0                              | Rickard and Pascoe (2009), Taraborrelli (2014) |
| G410apint53 | TrGC   | $\text{C86O2} + \text{HO}_2 \rightarrow \text{C86OOH}$                                               | KR02H02*0.859                       | Rickard and Pascoe (2009), Taraborrelli (2014) |
| G410apint54 | TrGC   | $\text{C86OOH} + h\nu \rightarrow \text{C511O2} + \text{CH}_3\text{COCH}_3 + \text{OH}$              | 1.14*jx(ip_CH300H)+ jx(ip_HOCH2CHO) | Rickard and Pascoe (2009), Taraborrelli (2014) |
| G410apint55 | TrGC   | $\text{C86OOH} + \text{OH} \rightarrow \text{C86O2}$                                                 | 3.45E-11                            | Rickard and Pascoe (2009), Taraborrelli (2014) |
| G410apint56 | TrGC   | $\text{PINALO2} + \text{HO}_2 \rightarrow \text{PINALOOH}$                                           | KR02H02*0.914                       | Rickard and Pascoe (2009), Taraborrelli (2014) |
| G410apint57 | TrGC   | $\text{PINALO2} + \text{NO} \rightarrow \text{PINALNO3}$                                             | KR02N0*0.050                        | Rickard and Pascoe (2009), Taraborrelli (2014) |
| G410apint58 | TrGC   | $\text{PINALO2} + \text{NO} \rightarrow \text{C106O2} + \text{NO}_2$                                 | KR02N0*0.950                        | Rickard and Pascoe (2009), Taraborrelli (2014) |
| G410apint59 | TrGC   | $\text{PINALO2} \rightarrow \text{C106O2}$                                                           | 6.70E-15*R02                        | Rickard and Pascoe (2009), Taraborrelli (2014) |
| G410apint60 | TrGC   | $\text{PINALOOH} + \text{OH} \rightarrow \text{PINALO2}$                                             | 2.75E-11                            | Rickard and Pascoe (2009), Taraborrelli (2014) |
| G410apint61 | TrGC   | $\text{PINALOOH} + h\nu \rightarrow \text{C106O2} + \text{OH}$                                       | 1.14*jx(ip_CH300H)+jx(ip_HOCH2CHO)  | Rickard and Pascoe (2009), Taraborrelli (2014) |
| G410apint62 | TrGC   | $\text{PINALNO3} + \text{OH} \rightarrow \text{CO235C6CHO} + \text{CH}_3\text{COCH}_3 + \text{NO}_2$ | 2.25E-11                            | Rickard and Pascoe (2009), Taraborrelli (2014) |
| G410apint63 | TrGC   | $\text{PINALNO3} + h\nu \rightarrow \text{C106O2} + \text{NO}_2$                                     | J_IC3H7N03+jx(ip_HOCH2CHO)          | Rickard and Pascoe (2009), Taraborrelli (2014) |
| G410apint64 | TrGC   | $\text{C106O2} + \text{HO}_2 \rightarrow \text{C106OOH}$                                             | KR02H02*0.914                       | Rickard and Pascoe (2009), Taraborrelli (2014) |

Table 1: Gas phase reactions (... continued)

| #           | labels | reaction                                                                                            | rate coefficient                                                                      | reference                                         |
|-------------|--------|-----------------------------------------------------------------------------------------------------|---------------------------------------------------------------------------------------|---------------------------------------------------|
| G410apint65 | TrGC   | $\text{C106O2} + \text{NO} \rightarrow \text{C106NO3}$                                              | $\text{KR02N0} \times 0.125$                                                          | Rickard and Pascoe (2009),<br>Taraborrelli (2014) |
| G410apint66 | TrGC   | $\text{C106O2} + \text{NO} \rightarrow \text{C716O2} + \text{CH}_3\text{COCH}_3 + \text{NO}_2$      | $\text{KR02N0} \times 0.875$                                                          | Rickard and Pascoe (2009),<br>Taraborrelli (2014) |
| G410apint67 | TrGC   | $\text{C106O2} \rightarrow \text{C716O2} + \text{CH}_3\text{COCH}_3$                                | $6.70\text{E-}15 \times \text{R02}$                                                   | Rickard and Pascoe (2009),<br>Taraborrelli (2014) |
| G410apint68 | TrGC   | $\text{C106OOH} + \text{OH} \rightarrow \text{C106O2}$                                              | $8.01\text{E-}11$                                                                     | Rickard and Pascoe (2009),<br>Taraborrelli (2014) |
| G410apint69 | TrGC   | $\text{C106OOH} + h\nu \rightarrow \text{C716O2} + \text{CH}_3\text{COCH}_3 + \text{OH}$            | $1.14 \times \text{jx}(\text{ip\_CH300H}) + \text{jx}(\text{ip\_HOCH2CHO})$           | Rickard and Pascoe (2009),<br>Taraborrelli (2014) |
| G410apint70 | TrGC   | $\text{C106NO3} + \text{OH} \rightarrow \text{CO235C6CHO} + \text{CH}_3\text{COCH}_3 + \text{NO}_2$ | $7.03\text{E-}11$                                                                     | Rickard and Pascoe (2009),<br>Taraborrelli (2014) |
| G410apint71 | TrGC   | $\text{C106NO3} + h\nu \rightarrow \text{C716O2} + \text{CH}_3\text{COCH}_3 + \text{NO}_2$          | $\text{J\_IC3H7N03} + \text{jx}(\text{ip\_HOCH2CHO})$                                 | Rickard and Pascoe (2009),<br>Taraborrelli (2014) |
| G410apint72 | TrGC   | $\text{CO235C6CHO} + \text{NO}_3 \rightarrow \text{CO235C6CO3} + \text{HNO}_3$                      | $\text{KN03AL} \times 5.5$                                                            | Rickard and Pascoe (2009),<br>Taraborrelli (2014) |
| G410apint73 | TrGC   | $\text{CO235C6CHO} + \text{OH} \rightarrow \text{CO235C6CO3}$                                       | $6.70\text{E-}11$                                                                     | Rickard and Pascoe (2009),<br>Taraborrelli (2014) |
| G410apint74 | TrGC   | $\text{CO235C6CHO} + h\nu \rightarrow \text{CHOC3COCO3} + \text{CH}_3\text{C(O)OO}$                 | $2.15 \times \text{jx}(\text{ip\_MGLY0X})$                                            | Rickard and Pascoe (2009),<br>Taraborrelli (2014) |
| G410apint75 | TrGC   | $\text{CO235C6CO3} + \text{HO}_2 \rightarrow \text{C235C6CO3H}$                                     | $\text{KAPH02} \times (\text{rco3\_ooh} + \text{rco3\_o3})$                           | Rickard and Pascoe (2009),<br>Taraborrelli (2014) |
| G410apint76 | TrGC   | $\text{CO235C6CO3} + \text{HO}_2 \rightarrow \text{CO235C6O2} + \text{OH}$                          | $\text{KAPH02} \times \text{rco3\_oh}$                                                | Rickard and Pascoe (2009),<br>Taraborrelli (2014) |
| G410apint77 | TrGC   | $\text{CO235C6CO3} + \text{NO} \rightarrow \text{CO235C6O2} + \text{NO}_2$                          | $\text{KAPN0}$                                                                        | Rickard and Pascoe (2009),<br>Taraborrelli (2014) |
| G410apint78 | TrGC   | $\text{CO235C6CO3} + \text{NO}_2 \rightarrow \text{C7PAN3}$                                         | $\text{k\_CH3CO3\_N02}$                                                               | Rickard and Pascoe (2009),<br>Taraborrelli (2014) |
| G410apint79 | TrGC   | $\text{CO235C6CO3} \rightarrow \text{CO235C6O2}$                                                    | $1.00\text{E-}11 \times \text{R02}$                                                   | Rickard and Pascoe (2009),<br>Taraborrelli (2014) |
| G410apint80 | TrGC   | $\text{C235C6CO3H} + \text{OH} \rightarrow \text{CO235C6CO3}$                                       | $4.75\text{E-}12$                                                                     | Rickard and Pascoe (2009),<br>Taraborrelli (2014) |
| G410apint81 | TrGC   | $\text{C235C6CO3H} + h\nu \rightarrow \text{CO235C6O2} + \text{OH}$                                 | $1.14 \times \text{jx}(\text{ip\_CH300H}) + 2.15 \times \text{jx}(\text{ip\_MGLY0X})$ | Rickard and Pascoe (2009),<br>Taraborrelli (2014) |

Table 1: Gas phase reactions (... continued)

| #           | labels | reaction                                                                                          | rate coefficient                                                        | reference                                         |
|-------------|--------|---------------------------------------------------------------------------------------------------|-------------------------------------------------------------------------|---------------------------------------------------|
| G410apint82 | TrGC   | $\text{CO235C6O2} + \text{HO}_2 \rightarrow \text{CO235C6OOH}$                                    | $\text{KR02H02} \times 0.770$                                           | Rickard and Pascoe (2009),<br>Taraborrelli (2014) |
| G410apint83 | TrGC   | $\text{CO235C6O2} + \text{NO} \rightarrow \text{CO23C4CO3} + \text{HCHO} + \text{NO}_2$           | $\text{KR02N0}$                                                         | Rickard and Pascoe (2009),<br>Taraborrelli (2014) |
| G410apint84 | TrGC   | $\text{CO235C6O2} \rightarrow \text{CO23C4CO3} + \text{HCHO}$                                     | $2.00\text{E-12} \times \text{R02}$                                     | Rickard and Pascoe (2009),<br>Taraborrelli (2014) |
| G410apint85 | TrGC   | $\text{C7PAN3} + \text{OH} \rightarrow \text{CO235C5CHO} + \text{CO} + \text{NO}_2$               | $8.83\text{E-13}$                                                       | Rickard and Pascoe (2009),<br>Taraborrelli (2014) |
| G410apint86 | TrGC   | $\text{C7PAN3} \rightarrow \text{CO235C6CO3} + \text{NO}_2$                                       | $\text{k\_PAN\_M}$                                                      | Rickard and Pascoe (2009),<br>Taraborrelli (2014) |
| G410apint87 | TrGC   | $\text{CO235C6OOH} + \text{OH} \rightarrow \text{CO235C6O2}$                                      | $1.01\text{E-11}$                                                       | Rickard and Pascoe (2009),<br>Taraborrelli (2014) |
| G410apint88 | TrGC   | $\text{CO235C6OOH} + h\nu \rightarrow \text{CO23C4CO3} + \text{HCHO} + \text{OH}$                 | $1.14 \times \text{jx(ip\_CH300H)} + 2.15 \times \text{jx(ip\_MGLY0X)}$ | Rickard and Pascoe (2009),<br>Taraborrelli (2014) |
| G410apint89 | TrGC   | $\text{C716O2} + \text{HO}_2 \rightarrow \text{C716OOH}$                                          | $\text{KR02H02} \times 0.820$                                           | Rickard and Pascoe (2009),<br>Taraborrelli (2014) |
| G410apint90 | TrGC   | $\text{C716O2} + \text{NO} \rightarrow \text{CO13C4CHO} + \text{CH}_3\text{C(O)OO} + \text{NO}_2$ | $\text{KR02N0}$                                                         | Rickard and Pascoe (2009),<br>Taraborrelli (2014) |
| G410apint91 | TrGC   | $\text{C716O2} \rightarrow \text{CO13C4CHO} + \text{CH}_3\text{C(O)OO}$                           | $8.80\text{E-13} \times \text{R02}$                                     | Rickard and Pascoe (2009),<br>Taraborrelli (2014) |
| G410apint92 | TrGC   | $\text{C716OOH} + \text{OH} \rightarrow \text{CO235C6CHO} + \text{OH}$                            | $1.20\text{E-10}$                                                       | Rickard and Pascoe (2009),<br>Taraborrelli (2014) |
| G410apint93 | TrGC   | $\text{C716OOH} + h\nu \rightarrow \text{CO13C4CHO} + \text{CH}_3\text{C(O)OO} + \text{OH}$       | $1.14 \times \text{jx(ip\_CH300H)} + \text{jx(ip\_HOCH2CHO)}$           | Rickard and Pascoe (2009),<br>Taraborrelli (2014) |
| G410apint94 | TrGC   | $\text{C511O2} \rightarrow \text{CH}_3\text{C(O)OO} + \text{HCOCH2CHO}$                           | $8.80\text{E-13} \times \text{R02}$                                     | Rickard and Pascoe (2009),<br>Taraborrelli (2014) |
| G410apint95 | TrGC   | $\text{C511O2} + \text{NO} \rightarrow \text{CH}_3\text{C(O)OO} + \text{HCOCH2CHO} + \text{NO}_2$ | $\text{KR02N0}$                                                         | Rickard and Pascoe (2009),<br>Taraborrelli (2014) |
| G410apint96 | TrGC   | $\text{C511O2} + \text{HO}_2 \rightarrow \text{C511OOH}$                                          | $\text{KR02H02} \times 0.706$                                           | Rickard and Pascoe (2009),<br>Taraborrelli (2014) |
| G410apint97 | TrGC   | $\text{C511OOH} + h\nu \rightarrow \text{CH}_3\text{C(O)OO} + \text{HCOCH2CHO} + \text{OH}$       | $1.14 \times \text{jx(ip\_CH300H)} + \text{jx(ip\_HOCH2CHO)}$           | Rickard and Pascoe (2009),<br>Taraborrelli (2014) |
| G410apint98 | TrGC   | $\text{C511OOH} + \text{OH} \rightarrow \text{C511O2}$                                            | $7.49\text{E-11}$                                                       | Rickard and Pascoe (2009),<br>Taraborrelli (2014) |

Table 1: Gas phase reactions (... continued)

| #            | labels | reaction                                                                                                                                     | rate coefficient                      | reference                                         |
|--------------|--------|----------------------------------------------------------------------------------------------------------------------------------------------|---------------------------------------|---------------------------------------------------|
| G410apint99  | TrGC   | $\text{HCOCH}_2\text{CHO} + \text{OH} \rightarrow \text{HCOCH}_2\text{CO}_3$                                                                 | 4.29E-11                              | Rickard and Pascoe (2009),<br>Taraborrelli (2014) |
| G410apint100 | TrGC   | $\text{HCOCH}_2\text{CHO} + h\nu \rightarrow \text{HCOCH}_2\text{O}_2 + \text{HO}_2 + \text{CO}$                                             | $\text{jx(ip\_H0CH2CHO)*2}$           | Rickard and Pascoe (2009),<br>Taraborrelli (2014) |
| G410apint101 | TrGC   | $\text{HCOCH}_2\text{CHO} + \text{NO}_3 \rightarrow \text{HCOCH}_2\text{CO}_3 + \text{HNO}_3$                                                | 2*KN03AL*2.4                          | Rickard and Pascoe (2009),<br>Taraborrelli (2014) |
| G410apint102 | TrGC   | $\text{C}_6\text{H}_{14}\text{O}_2 \rightarrow \text{CO}_2\text{C}_4\text{CHO} + \text{HCHO} + \text{HO}_2$                                  | 8.80E-13*R02                          | Rickard and Pascoe (2009),<br>Taraborrelli (2014) |
| G410apint103 | TrGC   | $\text{C}_6\text{H}_{14}\text{O}_2 + \text{NO} \rightarrow \text{C}_6\text{H}_{14}\text{NO}_3$                                               | KR02N0*0.098                          | Rickard and Pascoe (2009),<br>Taraborrelli (2014) |
| G410apint104 | TrGC   | $\text{C}_6\text{H}_{14}\text{O}_2 + \text{NO} \rightarrow \text{CO}_2\text{C}_4\text{CHO} + \text{HCHO} + \text{HO}_2 + \text{NO}_2$        | KR02N0*0.902                          | Rickard and Pascoe (2009),<br>Taraborrelli (2014) |
| G410apint105 | TrGC   | $\text{C}_6\text{H}_{14}\text{O}_2 + \text{HO}_2 \rightarrow \text{C}_6\text{H}_{14}\text{OOH}$                                              | KR02H02*0.770                         | Rickard and Pascoe (2009),<br>Taraborrelli (2014) |
| G410apint106 | TrGC   | $\text{C}_6\text{H}_{14}\text{NO}_3 + h\nu \rightarrow \text{CO}_2\text{C}_4\text{CHO} + \text{HCHO} + \text{HO}_2 + \text{NO}_2$            | 2.15*jx(ip_MGLY0X)                    | Rickard and Pascoe (2009),<br>Taraborrelli (2014) |
| G410apint107 | TrGC   | $\text{C}_6\text{H}_{14}\text{NO}_3 + \text{OH} \rightarrow \text{C}_6\text{H}_{14}\text{CO} + \text{NO}_2$                                  | 7.11E-12                              | Rickard and Pascoe (2009),<br>Taraborrelli (2014) |
| G410apint108 | TrGC   | $\text{C}_6\text{H}_{14}\text{OOH} + h\nu \rightarrow \text{CO}_2\text{C}_4\text{CHO} + \text{HCHO} + \text{HO}_2 + \text{OH}$               | 1.14*jx(ip_CH300H)+2.15*jx(ip_MGLY0X) | Rickard and Pascoe (2009),<br>Taraborrelli (2014) |
| G410apint109 | TrGC   | $\text{C}_6\text{H}_{14}\text{OOH} + \text{OH} \rightarrow \text{C}_6\text{H}_{14}\text{CO} + \text{OH}$                                     | 8.69E-11                              | Rickard and Pascoe (2009),<br>Taraborrelli (2014) |
| G410apint110 | TrGC   | $\text{C}_6\text{H}_{14}\text{CO} + h\nu \rightarrow \text{CH}_3\text{COCOC}_2\text{H}_5 + \text{HOCH}_2\text{CO}_3$                         | J_ACETOL                              | Rickard and Pascoe (2009),<br>Taraborrelli (2014) |
| G410apint111 | TrGC   | $\text{C}_6\text{H}_{14}\text{CO} + \text{OH} \rightarrow \text{CO}_2\text{C}_5\text{CHO} + \text{HO}_2$                                     | 3.22E-12                              | Rickard and Pascoe (2009),<br>Taraborrelli (2014) |
| G410apint112 | TrGC   | $\text{CH}_3\text{COCOC}_2\text{H}_5 \rightarrow \text{CH}_3\text{C}(\text{O})\text{OO} + \text{HCHO} + \text{CO}$                           | 2.00E-12*R02                          | Rickard and Pascoe (2009),<br>Taraborrelli (2014) |
| G410apint113 | TrGC   | $\text{CH}_3\text{COCOC}_2\text{H}_5 + \text{HO}_2 \rightarrow \text{CH}_3\text{COCOC}_2\text{H}_5\text{OOH}$                                | KR02H02*0.625                         | Rickard and Pascoe (2009),<br>Taraborrelli (2014) |
| G410apint114 | TrGC   | $\text{CH}_3\text{COCOC}_2\text{H}_5 + \text{NO} \rightarrow \text{CH}_3\text{C}(\text{O})\text{OO} + \text{HCHO} + \text{CO} + \text{NO}_2$ | KR02N0                                | Rickard and Pascoe (2009),<br>Taraborrelli (2014) |
| G410apint115 | TrGC   | $\text{CH}_3\text{COCOC}_2\text{H}_5\text{OOH} + \text{OH} \rightarrow \text{CH}_3\text{COCOC}_2\text{H}_5 + \text{OH}$                      | ks*fco*fsooh                          | Rickard and Pascoe (2009),<br>Taraborrelli (2014) |

Table 1: Gas phase reactions (... continued)

| #            | labels | reaction                                                                                                                 | rate coefficient                                           | reference                                      |
|--------------|--------|--------------------------------------------------------------------------------------------------------------------------|------------------------------------------------------------|------------------------------------------------|
| G410apint116 | TrGC   | $\text{CH}_3\text{COCOCH}_2\text{OOH} + \text{OH} \rightarrow \text{CH}_3\text{COCOCH}_2\text{O}_2$                      | $.6 * k_{\text{CH300H\_OH}}$                               | Rickard and Pascoe (2009), Taraborrelli (2014) |
| G410apint117 | TrGC   | $\text{CH}_3\text{COCOCH}_2\text{OOH} + h\nu \rightarrow \text{CH}_3\text{COCOCHO} + \text{OH} + \text{HO}_2$            | $1.14 * jx(ip_{\text{CH300H}})$                            | Rickard and Pascoe (2009), Taraborrelli (2014) |
| G410apint118 | TrGC   | $\text{CH}_3\text{COCOCH}_2\text{OOH} + h\nu \rightarrow \text{CH}_3\text{C(O)OO} + \text{CO} + \text{OH} + \text{HCHO}$ | $J_{\text{ACETOL}}$                                        | Rickard and Pascoe (2009), Taraborrelli (2014) |
| G410apint119 | TrGC   | $\text{CH}_3\text{COCOCH}_2\text{OOH} + h\nu \rightarrow \text{CH}_3\text{C(O)OO} + \text{HCOCO}_3$                      | $2.15 * jx(ip_{\text{MGLYOX}})$                            | Rickard and Pascoe (2009), Taraborrelli (2014) |
| G410apint120 | TrGC   | $\text{CO}_2\text{C}_5\text{CHO} + \text{OH} \rightarrow \text{CO}_2\text{C}_4\text{CO}_3 + \text{CO}$                   | $1.33\text{E-}11$                                          | Rickard and Pascoe (2009), Taraborrelli (2014) |
| G410apint121 | TrGC   | $\text{CO}_2\text{C}_5\text{CHO} + h\nu \rightarrow \text{CO}_2\text{C}_4\text{CO}_3 + \text{CO} + \text{HO}_2$          | $jx(ip_{\text{MGLYOX}})$                                   | Rickard and Pascoe (2009), Taraborrelli (2014) |
| G410apint122 | TrGC   | $\text{CO}_2\text{C}_5\text{CHO} + \text{NO}_3 \rightarrow \text{CO}_2\text{C}_4\text{CO}_3 + \text{CO} + \text{HNO}_3$  | $\text{KN03AL} * 5.5$                                      | Rickard and Pascoe (2009), Taraborrelli (2014) |
| G410apint123 | TrGC   | $\text{CO}_2\text{C}_4\text{CHO} + \text{OH} \rightarrow \text{CO}_2\text{C}_4\text{CO}_3$                               | $6.65\text{E-}11$                                          | Rickard and Pascoe (2009), Taraborrelli (2014) |
| G410apint124 | TrGC   | $\text{CO}_2\text{C}_4\text{CHO} + h\nu \rightarrow \text{CH}_3\text{COCOCH}_2\text{O}_2 + \text{HO}_2 + \text{CO}$      | $jx(ip_{\text{H0CH2CHO}})$                                 | Rickard and Pascoe (2009), Taraborrelli (2014) |
| G410apint125 | TrGC   | $\text{CO}_2\text{C}_4\text{CHO} + h\nu \rightarrow \text{CH}_3\text{C(O)OO} + \text{HCOCH}_2\text{CO}_3$                | $2.15 * jx(ip_{\text{MGLYOX}})$                            | Rickard and Pascoe (2009), Taraborrelli (2014) |
| G410apint126 | TrGC   | $\text{CO}_2\text{C}_4\text{CHO} + \text{NO}_3 \rightarrow \text{CO}_2\text{C}_4\text{CO}_3 + \text{HNO}_3$              | $\text{KN03AL} * 5.5$                                      | Rickard and Pascoe (2009), Taraborrelli (2014) |
| G410apint127 | TrGC   | $\text{CO}_2\text{C}_4\text{CO}_3 \rightarrow \text{CH}_3\text{COCOCH}_2\text{O}_2$                                      | $1.00\text{E-}11 * R_{02}$                                 | Rickard and Pascoe (2009), Taraborrelli (2014) |
| G410apint128 | TrGC   | $\text{CO}_2\text{C}_4\text{CO}_3 + \text{NO} \rightarrow \text{CH}_3\text{COCOCH}_2\text{O}_2 + \text{NO}_2$            | $\text{KAPNO}$                                             | Rickard and Pascoe (2009), Taraborrelli (2014) |
| G410apint129 | TrGC   | $\text{CO}_2\text{C}_4\text{CO}_3 + \text{NO}_2 \rightarrow \text{C}_5\text{PAN}_9$                                      | $k_{\text{CH3CO3\_NO2}}$                                   | Rickard and Pascoe (2009), Taraborrelli (2014) |
| G410apint130 | TrGC   | $\text{CO}_2\text{C}_4\text{CO}_3 + \text{HO}_2 \rightarrow \text{CO}_2\text{C}_4\text{CO}_3\text{H}$                    | $\text{KAPH02} * (rco3_{\text{ooh}} + rco3_{\text{o3}})$   | Rickard and Pascoe (2009), Taraborrelli (2014) |
| G410apint131 | TrGC   | $\text{CO}_2\text{C}_4\text{CO}_3 + \text{HO}_2 \rightarrow \text{CH}_3\text{COCOCH}_2\text{O}_2 + \text{OH}$            | $\text{KAPH02} * rco3_{\text{oh}}$                         | Rickard and Pascoe (2009), Taraborrelli (2014) |
| G410apint132 | TrGC   | $\text{CO}_2\text{C}_4\text{CO}_3\text{H} + h\nu \rightarrow \text{CH}_3\text{COCOCH}_2\text{O}_2 + \text{OH}$           | $1.14 * jx(ip_{\text{CH300H}}) + jx(ip_{\text{H0CH2CHO}})$ | Rickard and Pascoe (2009), Taraborrelli (2014) |

Table 1: Gas phase reactions (... continued)

| #            | labels | reaction                                                                                        | rate coefficient                                                                  | reference                                      |
|--------------|--------|-------------------------------------------------------------------------------------------------|-----------------------------------------------------------------------------------|------------------------------------------------|
| G410apint133 | TrGC   | $\text{CO23C4CO3H} + h\nu \rightarrow \text{CO23C4CO3}$                                         | 4.23E-12                                                                          | Rickard and Pascoe (2009), Taraborrelli (2014) |
| G410apint134 | TrGC   | $\text{C5PAN9} \rightarrow \text{CO23C4CO3} + \text{NO}_2$                                      | k_PAN_M                                                                           | Rickard and Pascoe (2009), Taraborrelli (2014) |
| G410apint135 | TrGC   | $\text{C5PAN9} + \text{OH} \rightarrow \text{CO23C3CHO} + \text{CO} + \text{NO}_2$              | 3.12E-13                                                                          | Rickard and Pascoe (2009), Taraborrelli (2014) |
| G410apint136 | TrGC   | $\text{HCOCH2CO3} \rightarrow 0.7 \text{HCOCH2O2} + 0.3 \text{HCOCH2CO2H}$                      | 1.00E-11*R02                                                                      | Rickard and Pascoe (2009), Taraborrelli (2014) |
| G410apint137 | TrGC   | $\text{HCOCH2CO3} + \text{NO} \rightarrow \text{HCOCH2O2} + \text{NO}_2$                        | KAPN0                                                                             | Rickard and Pascoe (2009), Taraborrelli (2014) |
| G410apint138 | TrGC   | $\text{HCOCH2CO3} + \text{NO}_2 \rightarrow \text{C3PAN2}$                                      | k_CH3CO3_NO2                                                                      | Rickard and Pascoe (2009), Taraborrelli (2014) |
| G410apint139 | TrGC   | $\text{HCOCH2CO3} + \text{HO}_2 \rightarrow \text{HCOCH2CO3H}$                                  | KAPH02*rco3_ooh                                                                   | Rickard and Pascoe (2009), Taraborrelli (2014) |
| G410apint140 | TrGC   | $\text{HCOCH2CO3} + \text{HO}_2 \rightarrow \text{HCOCH2CO2H} + \text{O}_3$                     | KAPH02*rco3_o3                                                                    | Rickard and Pascoe (2009), Taraborrelli (2014) |
| G410apint141 | TrGC   | $\text{HCOCH2CO3} + \text{HO}_2 \rightarrow \text{HCOCH2O2} + \text{CO}_2 + \text{OH}$          | KAPH02*rco3_oh                                                                    | Rickard and Pascoe (2009), Taraborrelli (2014) |
| G410apint142 | TrGC   | $\text{C3PAN2} \rightarrow \text{HCOCH2CO3} + \text{NO}_2$                                      | k_PAN_M                                                                           | Rickard and Pascoe (2009), Taraborrelli (2014) |
| G410apint143 | TrGC   | $\text{C3PAN2} + \text{OH} \rightarrow \text{GLYOX} + \text{CO} + \text{NO}_2$                  | 2.10E-11                                                                          | Rickard and Pascoe (2009), Taraborrelli (2014) |
| G410apint144 | TrGC   | $\text{HCOCH2CO2H} + \text{OH} \rightarrow \text{HCOCH2O2}$                                     | 2.14E-11                                                                          | Rickard and Pascoe (2009), Taraborrelli (2014) |
| G410apint145 | TrGC   | $\text{HCOCH2CO2H} + h\nu \rightarrow \text{HCOCH2O2} + \text{HO}_2$                            | jx(ip_HOCH2CHO)                                                                   | Rickard and Pascoe (2009), Taraborrelli (2014) |
| G410apint146 | TrGC   | $\text{APINENE} + \text{O}_3 \rightarrow \text{APINBOO}$                                        | $1.01\text{E-15} \cdot \text{EXP}(-732/\text{TEMP}) \cdot 0.50 \cdot 0.18$        | Capouet et al. (2008)                          |
| G410apint147 | TrGC   | $\text{APINENE} + \text{O}_3 \rightarrow \text{PINONIC}$                                        | $1.01\text{E-15} \cdot \text{EXP}(-732/\text{TEMP}) \cdot 0.50 \cdot 0.16$        | Capouet et al. (2008)                          |
| G410apint148 | TrGC   | $\text{APINENE} + \text{O}_3 \rightarrow \text{OH} + \text{NORPINAL} + \text{CO} + \text{HO}_2$ | $1.01\text{E-15} \cdot \text{EXP}(-732/\text{TEMP}) \cdot 0.50 \cdot 0.66$        | Capouet et al. (2008)                          |
| G410apint149 | TrGC   | $\text{APINENE} + \text{O}_3 \rightarrow \text{APINAOO}$                                        | $1.01\text{E-15} \cdot \text{EXP}(-732/\text{TEMP}) \cdot 0.50 \cdot 0.12$        | Capouet et al. (2008)                          |
| G410apint150 | TrGC   | $\text{APINENE} + \text{O}_3 \rightarrow \text{OH} + \text{C109O2}$                             | $1.01\text{E-15} \cdot \text{EXP}(-732/\text{TEMP}) \cdot 0.50 \cdot (.22 + .66)$ | Capouet et al. (2008)*                         |
| G410apint151 | TrGC   | $\text{APINAOO} \rightarrow \text{PINAL} + \text{H}_2\text{O}_2$                                | $1.00\text{E-17} \cdot c(\text{ind\_H2O})$                                        | Rickard and Pascoe (2009), Taraborrelli (2014) |
| G410apint152 | TrGC   | $\text{APINAOO} + \text{CO} \rightarrow \text{PINAL}$                                           | 1.20E-15                                                                          | Rickard and Pascoe (2009), Taraborrelli (2014) |

Table 1: Gas phase reactions (... continued)

| #            | labels | reaction                                                                       | rate coefficient                   | reference                                       |
|--------------|--------|--------------------------------------------------------------------------------|------------------------------------|-------------------------------------------------|
| G410apint153 | TrGC   | APINAOO + NO $\rightarrow$ PINAL + NO <sub>2</sub>                             | 1.00E-14                           | Rickard and Pascoe (2009), Taraborrelli (2014)  |
| G410apint154 | TrGC   | APINAOO + NO <sub>2</sub> $\rightarrow$ PINAL + NO <sub>3</sub>                | 1.00E-15                           | Rickard and Pascoe (2009), Taraborrelli (2014)  |
| G410apint155 | TrGC   | APINAOO + SO <sub>2</sub> $\rightarrow$ PINAL + H <sub>2</sub> SO <sub>4</sub> | 7.00E-14                           | Rickard and Pascoe (2009), Taraborrelli (2014)  |
| G410apint156 | TrGC   | APINBOO $\rightarrow$ PINONIC                                                  | 1.00E-17*c(ind_H2O)*(0.08+0.15)    | Rickard and Pascoe (2009), Taraborrelli (2014)  |
| G410apint157 | TrGC   | APINBOO $\rightarrow$ PINAL + H <sub>2</sub> O <sub>2</sub>                    | 1.00E-17*c(ind_H2O)*0.77           | Rickard and Pascoe (2009), Taraborrelli (2014)  |
| G410apint158 | TrGC   | APINBOO + CO $\rightarrow$ PINAL                                               | 1.20E-15                           | Rickard and Pascoe (2009), Taraborrelli (2014)  |
| G410apint159 | TrGC   | APINBOO + NO $\rightarrow$ PINAL + NO <sub>2</sub>                             | 1.00E-14                           | Rickard and Pascoe (2009), Taraborrelli (2014)  |
| G410apint160 | TrGC   | APINBOO + NO <sub>2</sub> $\rightarrow$ PINAL + NO <sub>3</sub>                | 1.00E-15                           | Rickard and Pascoe (2009), Taraborrelli (2014)  |
| G410apint161 | TrGC   | APINBOO + SO <sub>2</sub> $\rightarrow$ PINAL + H <sub>2</sub> SO <sub>4</sub> | 7.00E-14                           | Rickard and Pascoe (2009), Taraborrelli (2014)  |
| G410apint162 | TrGC   | C109O2 $\rightarrow$ C89CO3 + HCHO                                             | 2.00E-12*R02                       | Rickard and Pascoe (2009), Taraborrelli (2014)* |
| G410apint163 | TrGC   | C109O2 + NO $\rightarrow$ C89CO3 + HCHO + NO <sub>2</sub>                      | KR02N0                             | Rickard and Pascoe (2009), Taraborrelli (2014)  |
| G410apint164 | TrGC   | C109O2 + HO <sub>2</sub> $\rightarrow$ C109OOH                                 | KR02H02*0.914                      | Rickard and Pascoe (2009), Taraborrelli (2014)  |
| G410apint165 | TrGC   | C109OOH $\rightarrow$ C89CO3 + HCHO + OH                                       | 1.14*jx(ip_CH300H)+jx(ip_HOCH2CHO) | Rickard and Pascoe (2009), Taraborrelli (2014)  |
| G410apint166 | TrGC   | C109OOH + OH $\rightarrow$ C109CO + OH                                         | 5.47E-11                           | Rickard and Pascoe (2009), Taraborrelli (2014)  |
| G410apint167 | TrGC   | C109OOH + h $\nu$ $\rightarrow$ C89CO3 + HCHO + OH                             | J_ACETOL                           | Rickard and Pascoe (2009), Taraborrelli (2014)  |
| G410apint168 | TrGC   | C109CO + OH $\rightarrow$ C89CO3 + CO                                          | 5.47E-11                           | Rickard and Pascoe (2009), Taraborrelli (2014)  |
| G410apint169 | TrGC   | C109CO + h $\nu$ $\rightarrow$ C89CO3 + CO + HO <sub>2</sub>                   | jx(ip_MGLY0X)+jx(ip_HOCH2CHO)      | Rickard and Pascoe (2009), Taraborrelli (2014)  |



Table 1: Gas phase reactions (... continued)

| #            | labels | reaction                                                                                                      | rate coefficient                                             | reference                                      |
|--------------|--------|---------------------------------------------------------------------------------------------------------------|--------------------------------------------------------------|------------------------------------------------|
| G410apint170 | TrGC   | $\text{C89CO3} \rightarrow .56 \text{ C811CO3} + .14 \text{ C89O2} + 0.3 \text{ C89CO2H}$                     | $1.00\text{E-}11 \cdot \text{R02}$                           | Rickard and Pascoe (2009), Taraborrelli (2014) |
| G410apint171 | TrGC   | $\text{C89CO3} + \text{HO}_2 \rightarrow \text{C89CO3H}$                                                      | KAPH02*rc03_ooh                                              | Rickard and Pascoe (2009), Taraborrelli (2014) |
| G410apint172 | TrGC   | $\text{C89CO3} + \text{HO}_2 \rightarrow \text{C89CO2H} + \text{O}_3$                                         | KAPH02*rc03_o3                                               | Rickard and Pascoe (2009), Taraborrelli (2014) |
| G410apint173 | TrGC   | $\text{C89CO3} + \text{HO}_2 \rightarrow .80 \text{ C811CO3} + 0.20 \text{ C89O2} + \text{OH}$                | KAPH02*rc03_oh                                               | Rickard and Pascoe (2009), Taraborrelli (2014) |
| G410apint174 | TrGC   | $\text{C89CO3} + \text{NO}_2 \rightarrow \text{C89PAN}$                                                       | k_CH3C03_N02                                                 | Rickard and Pascoe (2009), Taraborrelli (2014) |
| G410apint175 | TrGC   | $\text{C89CO3} + \text{NO} \rightarrow 0.80 \text{ C811CO3} + 0.20 \text{ C89O2} + \text{NO}_2$               | KAPN0                                                        | Rickard and Pascoe (2009), Taraborrelli (2014) |
| G410apint176 | TrGC   | $\text{C89CO2H} + \text{OH} \rightarrow 0.80 \text{ C811CO3} + 0.20 \text{ C89O2}$                            | $2.69\text{E-}11$                                            | Rickard and Pascoe (2009), Taraborrelli (2014) |
| G410apint177 | TrGC   | $\text{C89CO2H} + h\nu \rightarrow 0.80 \text{ C811CO3} + 0.20 \text{ C89O2} + \text{HO}_2$                   | jx(ip_H0CH2CH0)                                              | Rickard and Pascoe (2009), Taraborrelli (2014) |
| G410apint178 | TrGC   | $\text{C89CO3H} \rightarrow 0.80 \text{ C811CO3} + 0.20 \text{ C89O2} + \text{OH}$                            | $1.14 \cdot \text{jx(ip\_CH300H)} + \text{jx(ip\_H0CH2CH0)}$ | Rickard and Pascoe (2009), Taraborrelli (2014) |
| G410apint179 | TrGC   | $\text{C89CO3H} + \text{OH} \rightarrow \text{C89CO3}$                                                        | $3.00\text{E-}11$                                            | Rickard and Pascoe (2009), Taraborrelli (2014) |
| G410apint180 | TrGC   | $\text{C89PAN} \rightarrow \text{C89CO3} + \text{NO}_2$                                                       | k_PAN_M                                                      | Rickard and Pascoe (2009), Taraborrelli (2014) |
| G410apint181 | TrGC   | $\text{C89PAN} + \text{OH} \rightarrow \text{CH}_3\text{COCH}_3 + \text{CO13C4CHO} + \text{CO} + \text{NO}_2$ | $2.52\text{E-}11$                                            | Rickard and Pascoe (2009), Taraborrelli (2014) |
| G410apint182 | TrGC   | $\text{C811CO3} \rightarrow 0.7 \text{ C811O2} + 0.3 \text{ PINIC}$                                           | $1.00\text{E-}11 \cdot \text{R02}$                           | Rickard and Pascoe (2009), Taraborrelli (2014) |
| G410apint183 | TrGC   | $\text{C811CO3} + \text{HO}_2 \rightarrow \text{C811CO3H}$                                                    | KAPH02*rc03_ooh                                              | Rickard and Pascoe (2009), Taraborrelli (2014) |
| G410apint184 | TrGC   | $\text{C811CO3} + \text{HO}_2 \rightarrow \text{PINIC} + \text{O}_3$                                          | KAPH02*rc03_o3                                               | Rickard and Pascoe (2009), Taraborrelli (2014) |
| G410apint185 | TrGC   | $\text{C811CO3} + \text{HO}_2 \rightarrow \text{C811O2} + \text{OH}$                                          | KAPH02*rc03_oh                                               | Rickard and Pascoe (2009), Taraborrelli (2014) |
| G410apint186 | TrGC   | $\text{C811CO3} + \text{NO} \rightarrow \text{C811O2} + \text{NO}_2$                                          | KAPN0                                                        | Rickard and Pascoe (2009), Taraborrelli (2014) |

Table 1: Gas phase reactions (... continued)

| #             | labels | reaction                                                                                          | rate coefficient                                                   | reference                                         |
|---------------|--------|---------------------------------------------------------------------------------------------------|--------------------------------------------------------------------|---------------------------------------------------|
| G410apint187  | TrGC   | $\text{C811CO3} + \text{NO}_2 \rightarrow \text{C811PAN}$                                         | $k_{\text{CH3CO3\_NO2}}$                                           | Rickard and Pascoe (2009),<br>Taraborrelli (2014) |
| G410apint188  | TrGC   | $\text{PINIC} + \text{OH} \rightarrow \text{C811O2}$                                              | $7.29\text{E-}12$                                                  | Rickard and Pascoe (2009),<br>Taraborrelli (2014) |
| G410ap188bf1  | TrGC   | $\text{C89O2} + \text{HO}_2 \rightarrow \text{C89OOH}$                                            | $\text{KR02H02*0.859}$                                             | Rickard and Pascoe (2009),<br>Taraborrelli (2014) |
| G410ap188bf2  | TrGC   | $\text{C89O2} + \text{NO} \rightarrow \text{C89NO3}$                                              | $\text{KR02N0*0.104}$                                              | Rickard and Pascoe (2009),<br>Taraborrelli (2014) |
| G410ap188bf3  | TrGNC  | $\text{C89O2} + \text{NO} \rightarrow \text{C810O2} + \text{NO}_2$                                | $\text{KR02N0*0.896}$                                              | Rickard and Pascoe (2009),<br>Taraborrelli (2014) |
| G410ap188bf4  | TrGNC  | $\text{C89O2} + \text{NO}_3 \rightarrow \text{C810O2} + \text{NO}_2$                              | $\text{KR02N03}$                                                   | Rickard and Pascoe (2009),<br>Taraborrelli (2014) |
| G410ap188bf5  | TrGC   | $\text{C89O2} \rightarrow \text{C810O2}$                                                          | $6.70\text{E-}15*\text{R02}$                                       | Rickard and Pascoe (2009),<br>Taraborrelli (2014) |
| G410ap188bf6  | TrGC   | $\text{C89OOH} + \text{OH} \rightarrow \text{C89O2}$                                              | $3.61\text{E-}11$                                                  | Rickard and Pascoe (2009),<br>Taraborrelli (2014) |
| G410ap188bf7  | TrGJC  | $\text{C89OOH} + h\nu \rightarrow \text{C810O2} + \text{OH}$                                      | $1.14*\text{jx}(\text{ip\_CH300H})+\text{jx}(\text{ip\_H0CH2CH0})$ | Rickard and Pascoe (2009),<br>Taraborrelli (2014) |
| G410ap188bf8  | TrGC   | $\text{C89NO3} + \text{OH} \rightarrow \text{CH}_3\text{COCH}_3 + \text{CO13C4CHO} + \text{NO}_2$ | $2.56\text{E-}11$                                                  | Rickard and Pascoe (2009),<br>Taraborrelli (2014) |
| G410ap188bf9  | TrGJNC | $\text{C89NO3} + h\nu \rightarrow \text{C810O2} + \text{NO}_2$                                    | $\text{J\_IC3H7N03}+\text{jx}(\text{ip\_H0CH2CH0})$                | Rickard and Pascoe (2009),<br>Taraborrelli (2014) |
| G410ap188bf10 | TrGC   | $\text{C810O2} + \text{HO}_2 \rightarrow \text{C810OOH}$                                          | $\text{KR02H02*0.914}$                                             | Rickard and Pascoe (2009),<br>Taraborrelli (2014) |
| G410ap188bf11 | TrGNC  | $\text{C810O2} + \text{NO} \rightarrow \text{C810NO3}$                                            | $\text{KR02N0*0.104}$                                              | Rickard and Pascoe (2009),<br>Taraborrelli (2014) |
| G410ap188bf12 | TrGNC  | $\text{C810O2} + \text{NO} \rightarrow \text{CH}_3\text{COCH}_3 + \text{C514O2} + \text{NO}_2$    | $\text{KR02N0*0.896}$                                              | Rickard and Pascoe (2009),<br>Taraborrelli (2014) |
| G410ap188bf13 | TrGNC  | $\text{C810O2} + \text{NO}_3 \rightarrow \text{CH}_3\text{COCH}_3 + \text{C514O2} + \text{NO}_2$  | $\text{KR02N03}$                                                   | Rickard and Pascoe (2009),<br>Taraborrelli (2014) |
| G410ap188bf14 | TrGC   | $\text{C810O2} \rightarrow \text{CH}_3\text{COCH}_3 + \text{C514O2}$                              | $6.70\text{E-}15*\text{R02}$                                       | Rickard and Pascoe (2009),<br>Taraborrelli (2014) |
| G410ap188bf15 | TrGC   | $\text{C810OOH} + \text{OH} \rightarrow \text{C810O2}$                                            | $8.35\text{E-}11$                                                  | Rickard and Pascoe (2009),<br>Taraborrelli (2014) |

Table 1: Gas phase reactions (... continued)

| #             | labels | reaction                                                                                           | rate coefficient                                 | reference                                          |
|---------------|--------|----------------------------------------------------------------------------------------------------|--------------------------------------------------|----------------------------------------------------|
| G410ap188bf16 | TrGJC  | $\text{C810OOH} + h\nu \rightarrow \text{CH}_3\text{COCH}_3 + \text{C514O2} + \text{OH}$           | $1.14 * jx(ip\_CH300H) + jx(ip\_HOCH2CHO)$       | Rickard and Pascoe (2009),<br>Taraborrelli (2014)  |
| G410ap188bf17 | TrGNC  | $\text{C810NO3} + \text{OH} \rightarrow \text{CH}_3\text{COCH}_3 + \text{CO13C4CHO} + \text{NO}_2$ | 4.96E-11                                         | Rickard and Pascoe (2009),<br>Taraborrelli (2014)  |
| G410ap188bf18 | TrGJC  | $\text{C810NO3} + h\nu \rightarrow \text{CH}_3\text{COCH}_3 + \text{C514O2} + \text{NO}_2$         | $2.84 * J\_IC3H7N03 + jx(ip\_HOCH2CHO)$          | Rickard and Pascoe (2009),<br>Taraborrelli (2014)  |
| G410ap188bf19 | TrGC   | $\text{C514O2} + \text{HO}_2 \rightarrow \text{C514OOH}$                                           | $KR02H02 * 0.706$                                | Rickard and Pascoe (2009),<br>Taraborrelli (2014)  |
| G410ap188bf20 | TrGNC  | $\text{C514O2} + \text{NO} \rightarrow \text{C514NO3}$                                             | $KR02N0 * 0.129$                                 | Rickard and Pascoe (2009),<br>Taraborrelli (2014)  |
| G410ap188bf21 | TrGNC  | $\text{C514O2} + \text{NO} \rightarrow \text{CO13C4CHO} + \text{HO}_2 + \text{NO}_2$               | $KR02N0 * 0.871$                                 | Rickard and Pascoe (2009),<br>Taraborrelli (2014)  |
| G410ap188bf22 | TrGNC  | $\text{C514O2} + \text{NO}_3 \rightarrow \text{CO13C4CHO} + \text{HO}_2 + \text{NO}_2$             | $KR02N03$                                        | Rickard and Pascoe (2009),<br>Taraborrelli (2014)  |
| G410ap188bf23 | TrGC   | $\text{C514O2} \rightarrow \text{CO13C4CHO} + \text{HO}_2$                                         | $2.50E-13 * R02$                                 | Rickard and Pascoe (2009),<br>Taraborrelli (2014)  |
| G410ap188bf24 | TrGC   | $\text{C514OOH} + \text{OH} \rightarrow \text{CO13C4CHO} + \text{OH}$                              | 1.10E-10                                         | Rickard and Pascoe (2009),<br>Taraborrelli (2014)  |
| G410ap188bf25 | TrGJC  | $\text{C514OOH} + h\nu \rightarrow \text{CO13C4CHO} + \text{HO}_2 + \text{OH}$                     | $1.14 * jx(ip\_CH300H) + jx(ip\_HOCH2CHO) * 2.0$ | Rickard and Pascoe (2009),<br>Taraborrelli (2014)  |
| G410ap188bf26 | TrGC   | $\text{C514NO3} + \text{OH} \rightarrow \text{CO13C4CHO} + \text{NO}_2$                            | 4.33E-11                                         | Rickard and Pascoe (2009),<br>Taraborrelli (2014)  |
| G410ap188bf27 | TrGJC  | $\text{C514NO3} + h\nu \rightarrow \text{CO13C4CHO} + \text{HO}_2 + \text{NO}_2$                   | $J\_IC3H7N03 + jx(ip\_HOCH2CHO) * 2.0$           | Rickard and Pascoe (2009),<br>Taraborrelli (2014)  |
| G410apint189  | TrGC   | $\text{C811O2} \rightarrow \text{C812O2}$                                                          | $1.30E-12 * R02$                                 | Rickard and Pascoe (2009),<br>Taraborrelli (2014)  |
| G410apint190  | TrGC   | $\text{C811O2} + \text{HO}_2 \rightarrow \text{C811OOH}$                                           | $KR02H02 * 0.859$                                | Rickard and Pascoe (2009),<br>Taraborrelli (2014)  |
| G410apint191  | TrGC   | $\text{C811O2} + \text{NO} \rightarrow \text{C812O2} + \text{NO}_2$                                | $KR02N0$                                         | Rickard and Pascoe (2009),<br>Taraborrelli (2014)* |
| G410apint192  | TrGC   | $\text{C811CO3H} + h\nu \rightarrow \text{C811O2} + \text{OH}$                                     | $1.14 * jx(ip\_CH300H)$                          | Rickard and Pascoe (2009),<br>Taraborrelli (2014)  |
| G410apint193  | TrGC   | $\text{C811CO3H} + \text{OH} \rightarrow \text{C811CO3}$                                           | 1.04E-11                                         | Rickard and Pascoe (2009),<br>Taraborrelli (2014)  |

Table 1: Gas phase reactions (... continued)

| #            | labels | reaction                                                                                       | rate coefficient                                                 | reference                                       |
|--------------|--------|------------------------------------------------------------------------------------------------|------------------------------------------------------------------|-------------------------------------------------|
| G410apint194 | TrGC   | $\text{C811PAN} \rightarrow \text{C811CO3} + \text{NO}_2$                                      | $\text{k\_PAN\_M}$                                               | Rickard and Pascoe (2009), Taraborrelli (2014)  |
| G410apint195 | TrGC   | $\text{C811PAN} + \text{OH} \rightarrow \text{C721CHO} + \text{CO} + \text{NO}_2$              | $6.77\text{E-}12$                                                | Rickard and Pascoe (2009), Taraborrelli (2014)  |
| G410apint196 | TrGC   | $\text{C812O2} \rightarrow \text{C813O2}$                                                      | $9.20\text{E-}14*\text{R02}$                                     | Rickard and Pascoe (2009), Taraborrelli (2014)* |
| G410apint197 | TrGC   | $\text{C812O2} + \text{NO} \rightarrow \text{C813O2} + \text{NO}_2$                            | $\text{KR02N0}$                                                  | Rickard and Pascoe (2009), Taraborrelli (2014)  |
| G410apint198 | TrGC   | $\text{C812O2} + \text{HO}_2 \rightarrow \text{C812OOH}$                                       | $\text{KR02H02}*0.859$                                           | Rickard and Pascoe (2009), Taraborrelli (2014)  |
| G410apint199 | TrGC   | $\text{C812OOH} + h\nu \rightarrow \text{C813O2} + \text{OH}$                                  | $1.14*\text{jx}(\text{ip\_CH300H})$                              | Rickard and Pascoe (2009), Taraborrelli (2014)  |
| G410apint200 | TrGC   | $\text{C812OOH} + \text{OH} \rightarrow \text{C812O2}$                                         | $1.09\text{E-}11$                                                | Rickard and Pascoe (2009), Taraborrelli (2014)  |
| G410apint201 | TrGC   | $\text{C813O2} \rightarrow \text{CH}_3\text{COCH}_3 + \text{C512O2}$                           | $6.70\text{E-}15*\text{R02}$                                     | Rickard and Pascoe (2009), Taraborrelli (2014)* |
| G410apint202 | TrGC   | $\text{C813O2} + \text{NO} \rightarrow \text{CH}_3\text{COCH}_3 + \text{C512O2} + \text{NO}_2$ | $\text{KR02N0}$                                                  | Rickard and Pascoe (2009), Taraborrelli (2014)* |
| G410apint203 | TrGC   | $\text{C813O2} + \text{HO}_2 \rightarrow \text{C813OOH}$                                       | $\text{KR02H02}*0.859$                                           | Rickard and Pascoe (2009), Taraborrelli (2014)  |
| G410apint204 | TrGC   | $\text{C813OOH} + h\nu \rightarrow \text{CH}_3\text{COCH}_3 + \text{C512O2} + \text{OH}$       | $1.14*\text{jx}(\text{ip\_CH300H})+\text{jx}(\text{ip\_MGLY0X})$ | Rickard and Pascoe (2009), Taraborrelli (2014)  |
| G410apint205 | TrGC   | $\text{C813OOH} + \text{OH} \rightarrow \text{C813O2}$                                         | $1.86\text{E-}11$                                                | Rickard and Pascoe (2009), Taraborrelli (2014)  |
| G410apint206 | TrGC   | $\text{C721CHO} + \text{NO}_3 \rightarrow \text{C721CO3} + \text{HNO}_3$                       | $\text{KN03AL}*8.5$                                              | Rickard and Pascoe (2009), Taraborrelli (2014)  |
| G410apint207 | TrGC   | $\text{C721CHO} + \text{OH} \rightarrow \text{C721CO3}$                                        | $2.63\text{E-}11$                                                | Rickard and Pascoe (2009), Taraborrelli (2014)  |
| G410apint208 | TrGC   | $\text{C721CHO} \rightarrow \text{C721O2} + \text{CO} + \text{HO}_2$                           | $\text{jx}(\text{ip\_H0CH2CHO})$                                 | Rickard and Pascoe (2009), Taraborrelli (2014)  |
| G410apint209 | TrGC   | $\text{C721CO3} + \text{HO}_2 \rightarrow \text{C721CO3H}$                                     | $\text{KAPH02*rc03\_ooh}$                                        | Rickard and Pascoe (2009), Taraborrelli (2014)  |
| G410apint210 | TrGC   | $\text{C721CO3} + \text{HO}_2 \rightarrow \text{C721O2} + \text{OH}$                           | $\text{KAPH02*rc03\_oh}$                                         | Rickard and Pascoe (2009), Taraborrelli (2014)  |

Table 1: Gas phase reactions (... continued)

| #            | labels | reaction                                                                          | rate coefficient   | reference                                         |
|--------------|--------|-----------------------------------------------------------------------------------|--------------------|---------------------------------------------------|
| G410apint211 | TrGC   | $\text{C721CO3} + \text{HO}_2 \rightarrow \text{NORPINIC} + \text{O}_3$           | KAPH02*rc03_o3     | Rickard and Pascoe (2009),<br>Taraborrelli (2014) |
| G410apint212 | TrGC   | $\text{C721CO3} + \text{NO} \rightarrow \text{C721O2} + \text{NO}_2$              | KAPN0              | Rickard and Pascoe (2009),<br>Taraborrelli (2014) |
| G410apint213 | TrGC   | $\text{C721CO3} + \text{NO}_2 \rightarrow \text{C721PAN}$                         | k_CH3CO3_NO2       | Rickard and Pascoe (2009),<br>Taraborrelli (2014) |
| G410apint214 | TrGC   | $\text{C721CO3} + \text{NO}_3 \rightarrow \text{C721O2} + \text{NO}_2$            | KR02N03*1.74       | Rickard and Pascoe (2009),<br>Taraborrelli (2014) |
| G410apint215 | TrGC   | $\text{C721CO3} \rightarrow \text{C721O2}$                                        | 1.00E-11*R02*0.7   | Rickard and Pascoe (2009),<br>Taraborrelli (2014) |
| G410apint216 | TrGC   | $\text{C721CO3} \rightarrow \text{NORPINIC}$                                      | 1.00E-11*R02*0.3   | Rickard and Pascoe (2009),<br>Taraborrelli (2014) |
| G410apint217 | TrGC   | $\text{C721O2} + \text{HO}_2 \rightarrow \text{C721OOH}$                          | KR02H02*0.820      | Rickard and Pascoe (2009),<br>Taraborrelli (2014) |
| G410apint218 | TrGC   | $\text{C721O2} + \text{NO} \rightarrow \text{C722O2} + \text{NO}_2$               | KR02N0             | Rickard and Pascoe (2009),<br>Taraborrelli (2014) |
| G410apint219 | TrGC   | $\text{C721O2} \rightarrow \text{C722O2}$                                         | 1.30E-12*R02       | Rickard and Pascoe (2009),<br>Taraborrelli (2014) |
| G410apint220 | TrGC   | $\text{C721CO3H} + \text{OH} \rightarrow \text{C721CO3}$                          | 9.65E-12           | Rickard and Pascoe (2009),<br>Taraborrelli (2014) |
| G410apint221 | TrGC   | $\text{C721CO3H} + h\nu \rightarrow \text{C721O2} + \text{OH}$                    | 1.14*jx(ip_CH300H) | Rickard and Pascoe (2009),<br>Taraborrelli (2014) |
| G410apint222 | TrGC   | $\text{NORPINIC} + \text{OH} \rightarrow \text{C721O2}$                           | 6.57E-12           | Rickard and Pascoe (2009),<br>Taraborrelli (2014) |
| G410apint223 | TrGC   | $\text{C721PAN} + \text{OH} \rightarrow \text{C721OOH} + \text{CO} + \text{NO}_2$ | 2.96E-12           | Rickard and Pascoe (2009),<br>Taraborrelli (2014) |
| G410apint224 | TrGC   | $\text{C721PAN} \rightarrow \text{C721CO3} + \text{NO}_2$                         | k_PAN_M            | Rickard and Pascoe (2009),<br>Taraborrelli (2014) |
| G410apint225 | TrGC   | $\text{C721OOH} + \text{OH} \rightarrow \text{C721O2}$                            | 1.27E-11           | Rickard and Pascoe (2009),<br>Taraborrelli (2014) |
| G410apint226 | TrGC   | $\text{C721OOH} + h\nu \rightarrow \text{C722O2} + \text{OH}$                     | 1.14*jx(ip_CH300H) | Rickard and Pascoe (2009),<br>Taraborrelli (2014) |
| G410apint227 | TrGC   | $\text{C722O2} + \text{HO}_2 \rightarrow \text{C722OOH}$                          | KR02H02*0.820      | Rickard and Pascoe (2009),<br>Taraborrelli (2014) |

Table 1: Gas phase reactions (... continued)

| #            | labels | reaction                                                                                      | rate coefficient                       | reference                                       |
|--------------|--------|-----------------------------------------------------------------------------------------------|----------------------------------------|-------------------------------------------------|
| G410apint228 | TrGC   | $\text{C722O2} + \text{NO} \rightarrow \text{CH}_3\text{COCH}_3 + \text{C44O2} + \text{NO}_2$ | KR02N0                                 | Rickard and Pascoe (2009), Taraborrelli (2014)  |
| G410apint229 | TrGC   | $\text{C722O2} \rightarrow \text{CH}_3\text{COCH}_3 + \text{C44O2}$                           | $6.70\text{E-15}*\text{R02}$           | Rickard and Pascoe (2009), Taraborrelli (2014)  |
| G410apint230 | TrGC   | $\text{C722OOH} + \text{OH} \rightarrow \text{C722O2}$                                        | $3.31\text{E-11}$                      | Rickard and Pascoe (2009), Taraborrelli (2014)  |
| G410apint231 | TrGC   | $\text{C722OOH} + h\nu \rightarrow \text{CH}_3\text{COCH}_3 + \text{C44O2} + \text{OH}$       | $1.14*jx(ip\_CH300H)$                  | Rickard and Pascoe (2009), Taraborrelli (2014)  |
| G410apint232 | TrGC   | $\text{C44O2} + \text{HO}_2 \rightarrow \text{C44OOH}$                                        | $\text{KR02H02}*0.625$                 | Rickard and Pascoe (2009), Taraborrelli (2014)  |
| G410apint233 | TrGC   | $\text{C44O2} + \text{NO} \rightarrow \text{HCOCH2CHO} + \text{HO}_2 + \text{NO}_2$           | KR02N0                                 | Rickard and Pascoe (2009), Taraborrelli (2014)  |
| G410apint234 | TrGC   | $\text{C44O2} \rightarrow \text{HCOCH2CHO} + \text{HO}_2$                                     | $8.80\text{E-13}*\text{R02}$           | Rickard and Pascoe (2009), Taraborrelli (2014)  |
| G410apint235 | TrGC   | $\text{C44OOH} + \text{OH} \rightarrow \text{C44O2}$                                          | $7.46\text{E-11}$                      | Rickard and Pascoe (2009), Taraborrelli (2014)  |
| G410apint236 | TrGC   | $\text{C44OOH} + h\nu \rightarrow \text{HCOCH2CHO} + \text{HO}_2 + \text{OH}$                 | $1.14*jx(ip\_CH300H)$                  | Rickard and Pascoe (2009), Taraborrelli (2014)  |
| G410apint237 | TrGC   | $\text{C512O2} \rightarrow \text{C513O2}$                                                     | $1.30\text{E-12}*\text{R02}$           | Rickard and Pascoe (2009), Taraborrelli (2014)* |
| G410apint238 | TrGC   | $\text{C512O2} + \text{HO}_2 \rightarrow \text{C512OOH}$                                      | $\text{KR02H02}*0.706$                 | Rickard and Pascoe (2009), Taraborrelli (2014)  |
| G410apint239 | TrGC   | $\text{C512O2} + \text{NO} \rightarrow \text{C513O2} + \text{NO}_2$                           | KR02N0                                 | Rickard and Pascoe (2009), Taraborrelli (2014)* |
| G410apint240 | TrGC   | $\text{C512OOH} + h\nu \rightarrow \text{C513O2} + \text{OH}$                                 | $1.14*jx(ip\_CH300H)+jx(ip\_HOCH2CHO)$ | Rickard and Pascoe (2009), Taraborrelli (2014)  |
| G410apint241 | TrGC   | $\text{C512OOH} + \text{OH} \rightarrow \text{CO13C4CHO} + \text{OH}$                         | $1.01\text{E-10}$                      | Rickard and Pascoe (2009), Taraborrelli (2014)  |
| G410apint242 | TrGC   | $\text{C513O2} \rightarrow \text{GLYOX} + \text{HOC2H4CO3}$                                   | $8.80\text{E-13}*\text{R02}$           | Rickard and Pascoe (2009), Taraborrelli (2014)* |
| G410apint243 | TrGC   | $\text{C513O2} + \text{NO} \rightarrow \text{GLYOX} + \text{HOC2H4CO3} + \text{NO}_2$         | KR02N0                                 | Rickard and Pascoe (2009), Taraborrelli (2014)  |
| G410apint244 | TrGC   | $\text{C513O2} + \text{HO}_2 \rightarrow \text{C513OOH}$                                      | $\text{KR02H02}*0.706$                 | Rickard and Pascoe (2009), Taraborrelli (2014)  |

Table 1: Gas phase reactions (... continued)

| #            | labels | reaction                                                                                  | rate coefficient                                                  | reference                                         |
|--------------|--------|-------------------------------------------------------------------------------------------|-------------------------------------------------------------------|---------------------------------------------------|
| G410apint245 | TrGC   | $\text{CO13C4CHO} + \text{OH} \rightarrow \text{CHOC3COCO3}$                              | 1.33E-10                                                          | Rickard and Pascoe (2009),<br>Taraborrelli (2014) |
| G410apint246 | TrGC   | $\text{CO13C4CHO} + h\nu \rightarrow \text{CHOC3COO2} + \text{CO} + \text{HO}_2$          | $\text{jx(ip\_HOCH2CHO)*2}$                                       | Rickard and Pascoe (2009),<br>Taraborrelli (2014) |
| G410apint247 | TrGC   | $\text{CO13C4CHO} + \text{NO}_3 \rightarrow \text{CHOC3COCO3} + \text{HNO}_3$             | 2*KN03AL*5.5                                                      | Rickard and Pascoe (2009),<br>Taraborrelli (2014) |
| G410apint248 | TrGC   | $\text{C513OOH} + h\nu \rightarrow \text{GLYOX} + \text{HOC2H4CO3} + \text{OH}$           | $1.14*\text{jx(ip\_CH300H)}+\text{jx(ip\_HOCH2CHO)}$              | Rickard and Pascoe (2009),<br>Taraborrelli (2014) |
| G410apint249 | TrGC   | $\text{C513OOH} + \text{OH} \rightarrow \text{C513CO} + \text{OH}$                        | 9.23E-11                                                          | Rickard and Pascoe (2009),<br>Taraborrelli (2014) |
| G410apint250 | TrGC   | $\text{CHOC3COCO3} \rightarrow \text{CHOC3COO2}$                                          | 1.00E-11*R02                                                      | Rickard and Pascoe (2009),<br>Taraborrelli (2014) |
| G410apint251 | TrGC   | $\text{CHOC3COCO3} + \text{HO}_2 \rightarrow \text{CHOC3COOOH}$                           | KAPH02                                                            | Rickard and Pascoe (2009),<br>Taraborrelli (2014) |
| G410apint252 | TrGC   | $\text{CHOC3COCO3} + \text{NO}_2 \rightarrow \text{CHOC3COPAN}$                           | k_CH3C03_N02                                                      | Rickard and Pascoe (2009),<br>Taraborrelli (2014) |
| G410apint253 | TrGC   | $\text{CHOC3COCO3} + \text{NO} \rightarrow \text{CHOC3COO2} + \text{NO}_2$                | KAPN0                                                             | Rickard and Pascoe (2009),<br>Taraborrelli (2014) |
| G410apint254 | TrGC   | $\text{CHOC3COO2} \rightarrow \text{HCOCH2CO3} + \text{HCHO}$                             | 2.00E-12*R02                                                      | Rickard and Pascoe (2009),<br>Taraborrelli (2014) |
| G410apint255 | TrGC   | $\text{CHOC3COO2} + \text{HO}_2 \rightarrow \text{C413COOOH}$                             | KR02H02*0.625                                                     | Rickard and Pascoe (2009),<br>Taraborrelli (2014) |
| G410apint256 | TrGC   | $\text{CHOC3COO2} + \text{NO} \rightarrow \text{HCOCH2CO3} + \text{HCHO} + \text{NO}_2$   | KR02N0                                                            | Rickard and Pascoe (2009),<br>Taraborrelli (2014) |
| G410apint257 | TrGC   | $\text{C513CO} + \text{OH} \rightarrow \text{HOC2H4CO3} + \text{CO} + \text{CO}$          | 2.64E-11                                                          | Rickard and Pascoe (2009),<br>Taraborrelli (2014) |
| G410apint258 | TrGC   | $\text{C513CO} + h\nu \rightarrow \text{HOC2H4CO3} + \text{HO}_2 + \text{CO} + \text{CO}$ | $\text{jx(ip\_MGLYOX)}+2.15*\text{jx(ip\_MGLYOX)}$                | Rickard and Pascoe (2009),<br>Taraborrelli (2014) |
| G410apint259 | TrGC   | $\text{C413COOOH} + \text{OH} \rightarrow \text{CHOC3COO2}$                               | 8.33E-11                                                          | Rickard and Pascoe (2009),<br>Taraborrelli (2014) |
| G410apint260 | TrGC   | $\text{C413COOOH} + h\nu \rightarrow \text{HCOCH2CO3} + \text{HCHO} + \text{OH}$          | $1.14*\text{jx(ip\_CH300H)}+\text{jx(ip\_HOCH2CHO)}$<br>+J_ACETOL | Rickard and Pascoe (2009),<br>Taraborrelli (2014) |
| G410apint261 | TrGC   | $\text{CHOC3COOOH} + \text{OH} \rightarrow \text{CHOC3COCO3}$                             | 7.55E-11                                                          | Rickard and Pascoe (2009),<br>Taraborrelli (2014) |

Table 1: Gas phase reactions (... continued)

| #            | labels | reaction                                                                                      | rate coefficient                                                                          | reference                                       |
|--------------|--------|-----------------------------------------------------------------------------------------------|-------------------------------------------------------------------------------------------|-------------------------------------------------|
| G410apint262 | TrGC   | $\text{CHOC3COOOH} + h\nu \rightarrow \text{CHOC3COO2} + \text{OH}$                           | $1.14 * \text{jx}(\text{ip\_CH300H}) + \text{jx}(\text{ip\_HOCH2CHO}) + \text{J\_ACETOL}$ | Rickard and Pascoe (2009), Taraborrelli (2014)  |
| G410apint263 | TrGC   | $\text{CHOC3COPAN} \rightarrow \text{CHOC3COCO3} + \text{NO}_2$                               | $\text{k\_PAN\_M}$                                                                        | Rickard and Pascoe (2009), Taraborrelli (2014)  |
| G410apint264 | TrGC   | $\text{CHOC3COPAN} + \text{OH} \rightarrow \text{C4CODIAL} + \text{CO} + \text{NO}_2$         | $7.19\text{E-}11$                                                                         | Rickard and Pascoe (2009), Taraborrelli (2014)  |
| G410apint265 | TrGC   | $\text{C4CODIAL} + \text{OH} \rightarrow \text{C312COCO3}$                                    | $3.39\text{E-}11$                                                                         | Rickard and Pascoe (2009), Taraborrelli (2014)  |
| G410apint266 | TrGC   | $\text{C4CODIAL} + h\nu \rightarrow \text{HCOCOCH2O2} + \text{HO}_2 + \text{CO}$              | $\text{jx}(\text{ip\_HOCH2CHO})$                                                          | Rickard and Pascoe (2009), Taraborrelli (2014)  |
| G410apint267 | TrGC   | $\text{C4CODIAL} + h\nu \rightarrow \text{HCOCH2CO3} + \text{HO}_2 + \text{CO}$               | $\text{jx}(\text{ip\_MGLY0X})$                                                            | Rickard and Pascoe (2009), Taraborrelli (2014)  |
| G410apint268 | TrGC   | $\text{C4CODIAL} + \text{NO}_3 \rightarrow \text{C312COCO3} + \text{HNO}_3$                   | $2 * \text{KN03AL} * 4.0$                                                                 | Rickard and Pascoe (2009), Taraborrelli (2014)  |
| G410apint269 | TrGC   | $\text{C312COCO3} \rightarrow \text{HCOCOCH2O2}$                                              | $1.00\text{E-}11 * \text{R02}$                                                            | Rickard and Pascoe (2009), Taraborrelli (2014)  |
| G410apint270 | TrGC   | $\text{C312COCO3} + \text{HO}_2 \rightarrow \text{C312COCO3H}$                                | $\text{KAPH02} * \text{rco3\_ooh}$                                                        | Rickard and Pascoe (2009), Taraborrelli (2014)  |
| G410apint271 | TrGC   | $\text{C312COCO3} + \text{HO}_2 \rightarrow \text{HCOCOCH2O2} + \text{OH}$                    | $\text{KAPH02} * (1 - \text{rco3\_ooh})$                                                  | Rickard and Pascoe (2009), Taraborrelli (2014)  |
| G410apint272 | TrGC   | $\text{C312COCO3} + \text{NO}_2 \rightarrow \text{C312COPAN}$                                 | $\text{k\_CH3C03\_N02}$                                                                   | Rickard and Pascoe (2009), Taraborrelli (2014)  |
| G410apint273 | TrGC   | $\text{C312COCO3} + \text{NO} \rightarrow \text{HCOCOCH2O2} + \text{NO}_2$                    | $\text{KAPN0}$                                                                            | Rickard and Pascoe (2009), Taraborrelli (2014)  |
| G410apint274 | TrGC   | $\text{C312COCO3H} + \text{OH} \rightarrow \text{C312COCO3}$                                  | $1.63\text{E-}11$                                                                         | Rickard and Pascoe (2009), Taraborrelli (2014)  |
| G410apint275 | TrGC   | $\text{C312COCO3H} + h\nu \rightarrow \text{HCOCOCH2O2} + \text{OH}$                          | $1.14 * \text{jx}(\text{ip\_CH300H}) + \text{jx}(\text{ip\_MGLY0X})$                      | Rickard and Pascoe (2009), Taraborrelli (2014)  |
| G410apint276 | TrGC   | $\text{C312COPAN} \rightarrow \text{C312COCO3} + \text{NO}_2$                                 | $\text{k\_PAN\_M}$                                                                        | Rickard and Pascoe (2009), Taraborrelli (2014)  |
| G410apint277 | TrGC   | $\text{C312COPAN} + \text{OH} \rightarrow \text{HCOCOCHO} + \text{CO} + \text{NO}_2$          | $1.27\text{E-}11$                                                                         | Rickard and Pascoe (2009), Taraborrelli (2014)* |
| G410apint278 | TrGC   | $\text{HOC2H4CO3} \rightarrow 0.7 \text{HOCH}_2\text{CH}_2\text{O}_2 + 0.3 \text{HOC2H4CO2H}$ | $1.00\text{E-}11 * \text{R02}$                                                            | Rickard and Pascoe (2009), Taraborrelli (2014)  |



Table 1: Gas phase reactions (... continued)

| #            | labels | reaction                                                                                    | rate coefficient                | reference                                          |
|--------------|--------|---------------------------------------------------------------------------------------------|---------------------------------|----------------------------------------------------|
| G410apint279 | TrGC   | $\text{HOC2H4CO3} + \text{NO} \rightarrow \text{HOCH}_2\text{CH}_2\text{O}_2 + \text{NO}_2$ | KAPN0                           | Rickard and Pascoe (2009),<br>Taraborrelli (2014)  |
| G410apint280 | TrGC   | $\text{HOC2H4CO3} + \text{HO}_2 \rightarrow \text{HOC2H4CO3H}$                              | KAPH02*rc03_ooh                 | Rickard and Pascoe (2009),<br>Taraborrelli (2014)  |
| G410apint281 | TrGC   | $\text{HOC2H4CO3} + \text{HO}_2 \rightarrow \text{HOCH}_2\text{CH}_2\text{O}_2 + \text{OH}$ | KAPH02*rc03_oh                  | Rickard and Pascoe (2009),<br>Taraborrelli (2014)  |
| G410apint282 | TrGC   | $\text{HOC2H4CO3} + \text{HO}_2 \rightarrow \text{HOC2H4CO2H} + \text{O}_3$                 | KAPH02*rc03_o3                  | Rickard and Pascoe (2009),<br>Taraborrelli (2014)  |
| G410apint283 | TrGC   | $\text{HOC2H4CO3} + \text{NO}_2 \rightarrow \text{C3PAN1}$                                  | k_CH3CO3_NO2                    | Rickard and Pascoe (2009),<br>Taraborrelli (2014)  |
| G410apint284 | TrGC   | $\text{HOC2H4CO2H} + \text{OH} \rightarrow \text{HOCH}_2\text{CH}_2\text{O}_2$              | 1.39E-11                        | Rickard and Pascoe (2009),<br>Taraborrelli (2014)  |
| G410apint285 | TrGC   | $\text{HOC2H4CO3H} + \text{OH} \rightarrow \text{HOC2H4CO3}$                                | 1.73E-11                        | Rickard and Pascoe (2009),<br>Taraborrelli (2014)  |
| G410apint286 | TrGC   | $\text{HOC2H4CO3H} + h\nu \rightarrow \text{HOCH}_2\text{CH}_2\text{O}_2 + \text{OH}$       | 1.14*jx(ip_CH300H)              | Rickard and Pascoe (2009),<br>Taraborrelli (2014)  |
| G410apint287 | TrGC   | $\text{C3PAN1} \rightarrow \text{HOC2H4CO3} + \text{NO}_2$                                  | k_PAN_M                         | Rickard and Pascoe (2009),<br>Taraborrelli (2014)  |
| G410apint288 | TrGC   | $\text{C3PAN1} + \text{OH} \rightarrow \text{HOCH}_2\text{CHO} + \text{CO} + \text{NO}_2$   | 4.51E-12                        | Rickard and Pascoe (2009),<br>Taraborrelli (2014)  |
| G410apint289 | TrGC   | $\text{APINENE} + \text{NO}_3 \rightarrow \text{LNAPINABO2}$                                | 1.2E-12*EXP(490./temp)          | Rickard and Pascoe (2009),<br>Taraborrelli (2014)  |
| G410apint290 | TrGC   | $\text{LNAPINABO2} \rightarrow \text{PINAL} + \text{NO}_2$                                  | (.65*6.70E-15+.35*2.50E-13)*R02 | Rickard and Pascoe (2009),<br>Taraborrelli (2014)  |
| G410apint291 | TrGC   | $\text{LNAPINABO2} + \text{NO} \rightarrow \text{PINAL} + \text{NO}_2 + \text{NO}_2$        | KR02N0                          | Rickard and Pascoe (2009),<br>Taraborrelli (2014)  |
| G410apint292 | TrGC   | $\text{LNAPINABO2} + \text{HO}_2 \rightarrow \text{LNAPINABOOH}$                            | KR02H02*0.914                   | Rickard and Pascoe (2009),<br>Taraborrelli (2014)  |
| G410apint293 | TrGC   | $\text{LNAPINABO2} + \text{NO}_3 \rightarrow \text{PINAL} + \text{NO}_2 + \text{NO}_2$      | KR02N03                         | Rickard and Pascoe (2009),<br>Taraborrelli (2014)  |
| G410apint294 | TrGC   | $\text{LNAPINABOOH} + h\nu \rightarrow \text{PINAL} + \text{NO}_2 + \text{OH}$              | 1.14*jx(ip_CH300H)              | Rickard and Pascoe (2009),<br>Taraborrelli (2014)  |
| G410apint295 | TrGC   | $\text{LNAPINABOOH} + \text{OH} \rightarrow \text{C96CO3}$                                  | .65*6.87E-12+.35*1.23E-11       | Rickard and Pascoe (2009),<br>Taraborrelli (2014)* |

Table 1: Gas phase reactions (... continued)

| #           | labels | reaction                                                                                       | rate coefficient                                                                            | reference                                          |
|-------------|--------|------------------------------------------------------------------------------------------------|---------------------------------------------------------------------------------------------|----------------------------------------------------|
| G410bpin    | TrGC   | BPINENE + OH $\rightarrow$ BPINAO2                                                             | $1.47\text{E}-11 * \text{EXP}(467/\text{TEMP}) * (0.8326 * 0.3 + 0.068) / (0.8326 + 0.068)$ | Vereecken and Peeters (2012)*                      |
| G410bpint2  | TrGC   | BPINENE + OH $\rightarrow$ LVROO6R1O2                                                          | $1.47\text{E}-11 * \text{EXP}(467/\text{TEMP}) * 0.8326 * 0.7 / (0.8326 + 0.068)$           | Vereecken and Peeters (2012)*                      |
| G410bpint3  | TrGC   | BPINAO2 + HO <sub>2</sub> $\rightarrow$ BPINAOOH                                               | KR02H02*0.914                                                                               | Rickard and Pascoe (2009), Taraborrelli (2014)     |
| G410bpint4  | TrGC   | BPINAO2 + NO $\rightarrow$ BPINANO3                                                            | KR02N0*0.240                                                                                | Rickard and Pascoe (2009), Taraborrelli (2014)     |
| G410bpint5  | TrGC   | BPINAO2 + NO $\rightarrow$ NOPINONE + HCHO + HO <sub>2</sub> + NO <sub>2</sub>                 | KR02N0*0.760                                                                                | Rickard and Pascoe (2009), Taraborrelli (2014)     |
| G410bpint6  | TrGC   | BPINAO2 $\rightarrow$ NOPINONE + HCHO + HO <sub>2</sub>                                        | $9.20\text{E}-14 * \text{R02}$                                                              | Rickard and Pascoe (2009), Taraborrelli (2014)     |
| G410bpint7  | TrGC   | BPINAOOH + OH $\rightarrow$ BPINAO2                                                            | $1.33\text{E}-11$                                                                           | Rickard and Pascoe (2009), Taraborrelli (2014)     |
| G410bpint8  | TrGC   | BPINAOOH + h $\nu$ $\rightarrow$ NOPINONE + HCHO + HO <sub>2</sub> + OH                        | $1.14 * \text{jx}(\text{ip\_CH300H})$                                                       | Rickard and Pascoe (2009), Taraborrelli (2014)     |
| G410bpint9  | TrGC   | BPINANO3 + OH $\rightarrow$ NOPINONE + HCHO + NO <sub>2</sub>                                  | $4.70\text{E}-12$                                                                           | Rickard and Pascoe (2009), Taraborrelli (2014)     |
| G410bpint10 | TrGC   | LVROO6R1O2 + NO $\rightarrow$ LVROO6R3O2 + CH <sub>3</sub> COCH <sub>3</sub> + NO <sub>2</sub> | KR02N0*0.892                                                                                | Vereecken and Peeters (2012), Taraborrelli (2014)  |
| G410bpint11 | TrGC   | LVROO6R1O2 + NO $\rightarrow$ LVROO6R1NO3                                                      | KR02N0*0.108                                                                                | Vereecken and Peeters (2012), Taraborrelli (2014)  |
| G410bpint12 | TrGC   | LVROO6R1O2 + HO <sub>2</sub> $\rightarrow$ LVROO6R1OOH                                         | KR02H02*0.914                                                                               | Vereecken and Peeters (2012), Taraborrelli (2014)  |
| G410bpint13 | TrGC   | LVROO6R1O2 $\rightarrow$ LVROO6R3O2 + CH <sub>3</sub> COCH <sub>3</sub>                        | $1.60\text{E}-13 * \text{R02}$                                                              | Vereecken and Peeters (2012), Taraborrelli (2014)  |
| G410bpint14 | TrGC   | LVROO6R3O2 $\rightarrow$ LVROO6R5O2                                                            | $5.68\text{E}10 * \text{exp}(-8745/\text{TEMP})$                                            | Vereecken and Peeters (2012), Taraborrelli (2014)* |
| G410bpint15 | TrGC   | LVROO6R3O2 + NO $\rightarrow$ LVROO6R3O + NO <sub>2</sub>                                      | KR02N0*0.890                                                                                | Vereecken and Peeters (2012), Taraborrelli (2014)  |
| G410bpint16 | TrGC   | LVROO6R3O2 + NO $\rightarrow$ LVROO6R3NO3                                                      | KR02N0*0.110                                                                                | Vereecken and Peeters (2012), Taraborrelli (2014)  |
| G410bpint17 | TrGC   | LVROO6R3O2 + HO <sub>2</sub> $\rightarrow$ LVROO6R3OOH                                         | KR02H02*0.820                                                                               | Vereecken and Peeters (2012), Taraborrelli (2014)  |

Table 1: Gas phase reactions (... continued)

| #           | labels | reaction                                                 | rate coefficient        | reference                                                           |
|-------------|--------|----------------------------------------------------------|-------------------------|---------------------------------------------------------------------|
| G410bpint18 | TrGC   | LVROO6R3O2 $\rightarrow$ LVROO6R3O                       | 2.50E-13*R02            | Vereecken and Peeters (2012), Taraborrelli (2014)                   |
| G410bpint19 | TrGC   | LVROO6R3O $\rightarrow$ LVROO6R4P + HO <sub>2</sub>      | 5.7E10*exp(-2949/TEMP)  | Vereecken and Peeters (2012), Taraborrelli (2014)*                  |
| G410bpint20 | TrGC   | LVROO6R5O2 $\rightarrow$ LVROO6R5P + OH                  | 9.17E10*exp(-8706/TEMP) | Vereecken and Peeters (2012), Taraborrelli (2014)*                  |
| G410bpint21 | TrGC   | LVRO6R1O2 + NO $\rightarrow$ LVRO6R3O2 + NO <sub>2</sub> | KR02N0*0.747            | Vereecken and Peeters (2012), Taraborrelli (2014)                   |
| G410bpint22 | TrGC   | LVRO6R1O2 + NO $\rightarrow$ LVRO6R1NO3                  | KR02N0*0.253            | Vereecken and Peeters (2012), Taraborrelli (2014)                   |
| G410bpint23 | TrGC   | LVRO6R1O2 + HO <sub>2</sub> $\rightarrow$ LVRO6R1OOH     | KR02H02*0.914           | Vereecken and Peeters (2012), Taraborrelli (2014)                   |
| G410bpint24 | TrGC   | LVRO6R1O2 $\rightarrow$ LVRO6R3O2                        | 8.80E-13*R02            | Vereecken and Peeters (2012), Taraborrelli (2014)                   |
| G410bpint25 | TrGC   | LVRO6R3O2 + NO $\rightarrow$ LVRO6R3P + NO <sub>2</sub>  | KR02N0*0.893            | Vereecken and Peeters (2012), Taraborrelli (2014)                   |
| G410bpint26 | TrGC   | LVRO6R3O2 + NO $\rightarrow$ LVRO6R3NO3                  | KR02N0*0.107            | Vereecken and Peeters (2012), Taraborrelli (2014)                   |
| G410bpint27 | TrGC   | LVRO6R3O2 + HO <sub>2</sub> $\rightarrow$ LVRO6R3OOH     | KR02H02*0.914           | Vereecken and Peeters (2012), Taraborrelli (2014)                   |
| G410bpint28 | TrGC   | LVRO6R3O2 $\rightarrow$ LVRO6R3P                         | 5.00E-12*R02            | Vereecken and Peeters (2012), Taraborrelli (2014)                   |
| G410bpint29 | TrGC   | NOPINONE + OH $\rightarrow$ NOPINDO2                     | 1.55E-11                | Lewis et al. (2005), Rickard and Pascoe (2009), Taraborrelli (2014) |
| G410bpint30 | TrGC   | NOPINDO2 + HO <sub>2</sub> $\rightarrow$ NOPINDOOH       | KR02H02*0.890           | Rickard and Pascoe (2009), Taraborrelli (2014)                      |
| G410bpint31 | TrGC   | NOPINDO2 + NO $\rightarrow$ C89CO3 + NO <sub>2</sub>     | KR02N0                  | Rickard and Pascoe (2009), Taraborrelli (2014)                      |
| G410bpint32 | TrGC   | NOPINDO2 $\rightarrow$ C89CO3                            | 2.00E-12*R02            | Rickard and Pascoe (2009), Taraborrelli (2014)                      |
| G410bpint33 | TrGC   | NOPINDOOH + OH $\rightarrow$ NOPINDCO + OH               | 2.63E-11                | Rickard and Pascoe (2009), Taraborrelli (2014)                      |
| G410bpint34 | TrGC   | NOPINDOOH + h $\nu$ $\rightarrow$ C89CO3 + OH            | 1.14*jx(ip_CH300H)      | Rickard and Pascoe (2009), Taraborrelli (2014)                      |

Table 1: Gas phase reactions (... continued)

| #           | labels | reaction                                                                                                                              | rate coefficient                              | reference                                      |
|-------------|--------|---------------------------------------------------------------------------------------------------------------------------------------|-----------------------------------------------|------------------------------------------------|
| G410bpint35 | TrGC   | $\text{NOPINDCO} + \text{OH} \rightarrow \text{C89CO3}$                                                                               | 3.07E-12                                      | Rickard and Pascoe (2009), Taraborrelli (2014) |
| G410bpint36 | TrGC   | $\text{BPINENE} + \text{O}_3 \rightarrow \text{NOPINONE} + .63 \text{ CO} + .37 \text{ HOCH2OOH} + .16 \text{ OH} + .16 \text{ HO}_2$ | $1.5\text{E-}17 * .051 / (1 - .027)$          | Nguyen et al. (2009), Taraborrelli (2014)      |
| G410bpint37 | TrGC   | $\text{BPINENE} + \text{O}_3 \rightarrow \text{NOPINOO}$                                                                              | $1.5\text{E-}17 * .368 / (1 - .027)$          | Nguyen et al. (2009), Taraborrelli (2014)      |
| G410bpint38 | TrGC   | $\text{BPINENE} + \text{O}_3 \rightarrow \text{NOPINDO2} + \text{OH}$                                                                 | $1.5\text{E-}17 * .283 / (1 - .027)$          | Nguyen et al. (2009), Taraborrelli (2014)      |
| G410bpint40 | TrGC   | $\text{BPINENE} + \text{O}_3 \rightarrow \text{C8BC} + \text{CO}_2$                                                                   | $1.5\text{E-}17 * (.104 + .167) / (1 - .027)$ | Nguyen et al. (2009), Taraborrelli (2014)*     |
| G410bpint41 | TrGC   | $\text{C8BC} + \text{OH} \rightarrow \text{C8BCO2}$                                                                                   | 3.04E-12                                      | Rickard and Pascoe (2009), Taraborrelli (2014) |
| G410bpint42 | TrGC   | $\text{C8BCO2} + \text{HO}_2 \rightarrow \text{C8BCOOH}$                                                                              | KR02H02*0.859                                 | Rickard and Pascoe (2009), Taraborrelli (2014) |
| G410bpint43 | TrGC   | $\text{C8BCO2} + \text{NO} \rightarrow \text{C8BCNO3}$                                                                                | KR02N0*0.138                                  | Rickard and Pascoe (2009), Taraborrelli (2014) |
| G410bpint44 | TrGC   | $\text{C8BCO2} + \text{NO} \rightarrow \text{C89O2} + \text{NO}_2$                                                                    | KR02N0*0.862                                  | Rickard and Pascoe (2009), Taraborrelli (2014) |
| G410bpint45 | TrGC   | $\text{C8BCO2} \rightarrow \text{C89O2}$                                                                                              | $2.50\text{E-}13 * \text{R02}$                | Rickard and Pascoe (2009), Taraborrelli (2014) |
| G410bpint46 | TrGC   | $\text{C8BCOOH} + \text{OH} \rightarrow \text{C8BCCO} + \text{OH}$                                                                    | 1.62E-11                                      | Rickard and Pascoe (2009), Taraborrelli (2014) |
| G410bpint47 | TrGC   | $\text{C8BCOOH} + h\nu \rightarrow \text{C89O2} + \text{OH}$                                                                          | $1.14 * \text{jx}(\text{ip\_CH300H})$         | Rickard and Pascoe (2009), Taraborrelli (2014) |
| G410bpint48 | TrGC   | $\text{C8BCNO3} + \text{OH} \rightarrow \text{C8BCCO} + \text{NO}_2$                                                                  | 1.84E-12                                      | Rickard and Pascoe (2009), Taraborrelli (2014) |
| G410bpint49 | TrGC   | $\text{C8BCNO3} \rightarrow \text{C89O2} + \text{NO}_2$                                                                               | J_IC3H7N03                                    | Rickard and Pascoe (2009), Taraborrelli (2014) |
| G410bpint50 | TrGC   | $\text{C8BCCO} + \text{OH} \rightarrow \text{C89O2}$                                                                                  | 3.94E-12                                      | Rickard and Pascoe (2009), Taraborrelli (2014) |
| G410bpint51 | TrGC   | $\text{NOPINOO} \rightarrow \text{NOPINONE} + \text{H}_2\text{O}_2$                                                                   | $6.00\text{E-}18 * c(\text{ind\_H2O})$        | Rickard and Pascoe (2009), Taraborrelli (2014) |
| G410bpint52 | TrGC   | $\text{NOPINOO} + \text{CO} \rightarrow \text{NOPINONE}$                                                                              | 1.2E-15                                       | Rickard and Pascoe (2009), Taraborrelli (2014) |

Table 1: Gas phase reactions (... continued)

| #            | labels | reaction                                                                                                | rate coefficient   | reference                                       |
|--------------|--------|---------------------------------------------------------------------------------------------------------|--------------------|-------------------------------------------------|
| G410bpint53  | TrGC   | $\text{NOPINOO} + \text{NO} \rightarrow \text{NOPINONE} + \text{NO}_2$                                  | 1.E-14             | Rickard and Pascoe (2009), Taraborrelli (2014)  |
| G410bpint54  | TrGC   | $\text{NOPINOO} + \text{NO}_2 \rightarrow \text{NOPINONE} + \text{NO}_3$                                | 1.E-15             | Rickard and Pascoe (2009), Taraborrelli (2014)  |
| G410bpint55  | TrGC   | $\text{NOPINOO} + \text{SO}_2 \rightarrow \text{NOPINONE} + \text{H}_2\text{SO}_4$                      | 7.E-14             | Rickard and Pascoe (2009), Taraborrelli (2014)  |
| G410bpint56  | TrGC   | $\text{BPINENE} + \text{NO}_3 \rightarrow \text{LNBPINABO2}$                                            | 2.51E-12           | Rickard and Pascoe (2009), Taraborrelli (2014)  |
| G410bpint57  | TrGC   | $\text{LNBPINABO2} + \text{HO}_2 \rightarrow \text{LNBPINABOOH}$                                        | KR02H02*0.914      | Rickard and Pascoe (2009), Taraborrelli (2014)  |
| G410bpint58  | TrGC   | $\text{LNBPINABO2} + \text{NO} \rightarrow \text{NOPINONE} + \text{HCHO} + \text{NO}_2 + \text{NO}_2$   | KR02N0             | Rickard and Pascoe (2009), Taraborrelli (2014)  |
| G410bpint59  | TrGC   | $\text{LNBPINABO2} + \text{NO}_3 \rightarrow \text{NOPINONE} + \text{HCHO} + \text{NO}_2 + \text{NO}_2$ | KR02N03            | Rickard and Pascoe (2009), Taraborrelli (2014)  |
| G410bpint60  | TrGC   | $\text{LNBPINABO2} \rightarrow \text{NOPINONE} + \text{HCHO} + \text{NO}_2$                             | 9.20E-14*R02*0.7   | Rickard and Pascoe (2009), Taraborrelli (2014)  |
| G410bpint61  | TrGC   | $\text{LNBPINABO2} \rightarrow \text{BPINAN03}$                                                         | 9.20E-14*R02*0.3   | Rickard and Pascoe (2009), Taraborrelli (2014)* |
| G410bpint62  | TrGC   | $\text{LNBPINABOOH} + \text{OH} \rightarrow \text{LNBPINABO2}$                                          | 9.58E-12           | Rickard and Pascoe (2009), Taraborrelli (2014)  |
| G410bpint63  | TrGC   | $\text{LNBPINABOOH} + h\nu \rightarrow \text{NOPINONE} + \text{HCHO} + \text{NO}_2 + \text{OH}$         | 1.14*jx(ip_CH300H) | Rickard and Pascoe (2009), Taraborrelli (2014)  |
| G410apint296 | TrGC   | $\text{CARENE} + \text{OH} \rightarrow \text{LAPINABO2}$                                                | 8.7E-11*(.50+.25)  | Wolfe et al. (2011), Taraborrelli (2014)*       |
| G410apint297 | TrGC   | $\text{CARENE} + \text{OH} \rightarrow \text{MENTHEN6ONE} + \text{HO}_2$                                | 8.7E-11*.25*.60    | Wolfe et al. (2011), Taraborrelli (2014)        |
| G410apint298 | TrGC   | $\text{CARENE} + \text{OH} \rightarrow \text{LVROO6R1O2}$                                               | 8.7E-11*.25*.40    | Wolfe et al. (2011), Taraborrelli (2014)        |
| G410apint299 | TrGC   | $\text{CARENE} + \text{O}_3 \rightarrow \text{APINBOO}$                                                 | 2.E-16*.50*.18     | Wolfe et al. (2011), Taraborrelli (2014)        |
| G410apint300 | TrGC   | $\text{CARENE} + \text{O}_3 \rightarrow \text{PINONIC}$                                                 | 2.E-16*.50*.16     | Wolfe et al. (2011), Taraborrelli (2014)        |
| G410apint301 | TrGC   | $\text{CARENE} + \text{O}_3 \rightarrow \text{OH} + \text{NORPINAL} + \text{CO} + \text{HO}_2$          | 2.E-16*.50*.66     | Wolfe et al. (2011), Taraborrelli (2014)        |

Table 1: Gas phase reactions (... continued)

| #            | labels | reaction                                                                                                                                    | rate coefficient              | reference                                                           |
|--------------|--------|---------------------------------------------------------------------------------------------------------------------------------------------|-------------------------------|---------------------------------------------------------------------|
| G410apint302 | TrGC   | CARENE + O <sub>3</sub> → APINAOO                                                                                                           | 2.E-16*.50*.12                | Wolfe et al. (2011), Taraborrelli (2014)                            |
| G410apint303 | TrGC   | CARENE + O <sub>3</sub> → OH + C109O2                                                                                                       | 2.E-16*.50*(.22+.66)          | Wolfe et al. (2011), Taraborrelli (2014)*                           |
| G410apint304 | TrGC   | CARENE + NO <sub>3</sub> → LNAPINABO2                                                                                                       | 9.5E-12                       | Wolfe et al. (2011), Taraborrelli (2014)                            |
| G410myrc     | TrGC   | BMYRCENE + OH → MYRCISOPO2                                                                                                                  | 9.19E-12*exp(1071./temp)*0.64 | Hites and Turner (2009), Orlando et al. (2000), Taraborrelli (2014) |
| G410myrct2   | TrGC   | BMYRCENE + OH → MYRCO2                                                                                                                      | 9.19E-12*exp(1071./temp)*0.36 | Hites and Turner (2009), Orlando et al. (2000), Taraborrelli (2014) |
| G410myrct3   | TrGC   | BMYRCENE + O <sub>3</sub> → .25 CH <sub>3</sub> COCH <sub>3</sub> + .75 OH + .75 CH <sub>3</sub> COCH <sub>2</sub> O <sub>2</sub> + MYRCCHO | 4.7E-16                       | Atkinson and Arey (2003), Taraborrelli (2014)                       |
| G410myrct4   | TrGNC  | BMYRCENE + NO <sub>3</sub> → MYRCNO3                                                                                                        | 1.1E-11                       | Atkinson and Arey (2003), Taraborrelli (2014)                       |
| G410myrct5   | TrGC   | MYRCO2 → CH <sub>3</sub> COCH <sub>3</sub> + HO <sub>2</sub> + MYRCCHO                                                                      | 8.E-13*R02                    | Taraborrelli (2014)                                                 |
| G410myrct6   | TrGC   | MYRCO2 + HO <sub>2</sub> → MYRCOOH                                                                                                          | KR02H02                       | Taraborrelli (2014)                                                 |
| G410myrct7   | TrGCN  | MYRCO2 + NO → .80 CH <sub>3</sub> COCH <sub>3</sub> + .80 HO <sub>2</sub> + .80 MYRCCHO + .80 NO <sub>2</sub> + .20 MYRCNO3                 | KR02N0                        | Taraborrelli (2014)*                                                |
| G410myrct8   | TrGCJ  | MYRCOOH + hν → CH <sub>3</sub> COCH <sub>3</sub> + OH + HO <sub>2</sub> + MYRCCHO                                                           | 1.14*jx(ip_CH300H)            | Taraborrelli (2014)                                                 |
| G410myrct9   | TrGC   | MYRCOOH + OH → MYRCOOHISOPO2                                                                                                                | 1.55E-10                      | Baker et al. (2004), Taraborrelli (2014)                            |
| G410myrct10  | TrGC   | MYRCOOH + NO <sub>3</sub> → CH <sub>3</sub> COCH <sub>3</sub> + SURCH3CHO + NISOPO2                                                         | 4.7E-13                       | Baker et al. (2004), Taraborrelli (2014)                            |
| G410myrct11  | TrGC   | MYRCNO3 + OH → iC <sub>3</sub> H <sub>7</sub> ONO <sub>2</sub> + MYRCCHOISOPO2                                                              | 1.55E-10                      | see note                                                            |
| G410myrct12  | TrGC   | MYRCISOPO2 → MYRCISOPO                                                                                                                      | 1.E-12*R02                    | Taraborrelli (2014)                                                 |
| G410myrct13  | TrGC   | MYRCISOPO2 + HO <sub>2</sub> → MYRCISOPOOH                                                                                                  | KR02H02                       | Taraborrelli (2014)                                                 |
| G410myrct14  | TrGC   | MYRCISOPO2 + NO → .8 MYRCISOPO + .8 NO <sub>2</sub> + .2 MYRCISOPNO3                                                                        | KR02N0                        | Taraborrelli (2014)                                                 |
| G410myrct15  | TrGC   | MYRCISOPO2 → MYRCHPALD + HO <sub>2</sub>                                                                                                    | K16HS                         | Taraborrelli (2014)*                                                |
| G410myrct16  | TrGC   | MYRCISOPO → CH <sub>3</sub> COCH <sub>3</sub> + SURCH3CHO + .43 MVK + .27 MACR + .7 HCHO + .29 LHC4ACCHO + HO <sub>2</sub>                  | KDEC                          | Taraborrelli (2014)                                                 |

Table 1: Gas phase reactions (... continued)

| #           | labels | reaction                                                                                                                                                      | rate coefficient         | reference                                |
|-------------|--------|---------------------------------------------------------------------------------------------------------------------------------------------------------------|--------------------------|------------------------------------------|
| G410myrct17 | TrGC   | MYRCISOPNO3 + OH $\rightarrow$ CH <sub>3</sub> COCH <sub>3</sub> + HO <sub>2</sub> + SURCH3CHO + ISOPBNO3                                                     | kadt+kads                | Taraborrelli (2014)                      |
| G410myrct18 | TrGC   | MYRCISOPOOH + h $\nu$ $\rightarrow$ MYRCISOPO + OH                                                                                                            | 1.14*jx(ip_CH300H)       | Taraborrelli (2014)                      |
| G410myrct19 | TrGC   | MYRCISOPOOH + OH $\rightarrow$ SURCH3CHO + .43 ISOPBOOH + .27 ISOPDOOH + .29 LISOPACOOH + CH <sub>3</sub> COCH <sub>3</sub> + HO <sub>2</sub>                 | kadt+kads                | Taraborrelli (2014)                      |
| G410myrct20 | TrGCJ  | MYRCHPALD + h $\nu$ $\rightarrow$ OH + ZCODC23DBCOOH + HO <sub>2</sub>                                                                                        | J_HPald                  | Taraborrelli (2014)                      |
| G410myrct21 | TrGC   | MYRCHPALD + OH $\rightarrow$ MYRCCHOHPALD + HO <sub>2</sub> + CH <sub>3</sub> COCH <sub>3</sub>                                                               | kadt+kads                | Taraborrelli (2014)                      |
| G410myrct22 | TrGC   | MYRCHPALD + OH $\rightarrow$ SURCH3CO3 + SURCH3CHO + HCHO + GLYOX + HO <sub>2</sub>                                                                           | (kadt+kads)*acho*ach2ooh | Taraborrelli (2014)                      |
| G410myrct23 | TrGC   | MYRCHPALD + O <sub>3</sub> $\rightarrow$ MYRCCHOHPALD + .25 CH <sub>3</sub> COCH <sub>3</sub> + .75 OH + .75 CH <sub>3</sub> COCH <sub>2</sub> O <sub>2</sub> | 4.7E-16                  | Taraborrelli (2014)                      |
| G410myrct24 | TrGC   | MYRCCHO + OH $\rightarrow$ SURCH3CHO + MYRCCHOISOPO2                                                                                                          | 1.55E-10                 | Baker et al. (2004), Taraborrelli (2014) |
| G410myrct25 | TrGC   | MYRCCHO + NO <sub>3</sub> $\rightarrow$ SURCH3CHO + NISOPO2                                                                                                   | 4.7E-13                  | Baker et al. (2004), Taraborrelli (2014) |
| G410myrct26 | TrGC   | MYRCCHOISOPO2 $\rightarrow$ MYRCCHOISOPO                                                                                                                      | 1.E-12*R02               | Taraborrelli (2014)                      |
| G410myrct27 | TrGC   | MYRCCHOISOPO2 + HO <sub>2</sub> $\rightarrow$ SURCH3CHO + .43 ISOPBOOH + .27 ISOPDOOH + .29 LISOPACOOH                                                        | KR02H02                  | Taraborrelli (2014)                      |
| G410myrct28 | TrGC   | MYRCCHOISOPO2 + NO $\rightarrow$ .8 MYRCCHOISOPO + .8 NO <sub>2</sub> + .2 SURCH3CHO + .2 ISOPBNO3                                                            | KR02N0                   | Taraborrelli (2014)                      |
| G410myrct29 | TrGC   | MYRCCHOISOPO2 $\rightarrow$ MYRCCHOHPALD + HO <sub>2</sub>                                                                                                    | K16HS                    | Taraborrelli (2014)*                     |
| G410myrct30 | TrGC   | MYRCCHOISOPO $\rightarrow$ SURCH3CHO + .43 MVK + .27 MACR + .7 HCHO + .29 LHC4ACCHO + HO <sub>2</sub>                                                         | KDEC                     | Taraborrelli (2014)                      |
| G410myrct31 | TrGCJ  | MYRCCHOHPALD + h $\nu$ $\rightarrow$ SURCH3CHO + OH + ZCODC23DBCOOH + HO <sub>2</sub>                                                                         | J_HPald                  | Taraborrelli (2014)                      |
| G410myrct32 | TrGC   | MYRCCHOHPALD + OH $\rightarrow$ SURCH3CHO + .3 C1ODC2O2C4OOH + .2 C1OOHC2O2C4OD + .3 C1ODC3O2C4OOH + .2 C1OOHC3O2C4OD                                         | (kadt+kads)*acho*ach2ooh | Taraborrelli (2014)                      |
| G410myrct33 | TrGC   | MYRCOOHISOPO2 $\rightarrow$ MYRCOOHISOPO                                                                                                                      | 1.E-12*R02               | Taraborrelli (2014)                      |
| G410myrct34 | TrGC   | MYRCOOHISOPO2 + HO <sub>2</sub> $\rightarrow$ MYRCOOHISOPOOH                                                                                                  | KR02H02                  | Taraborrelli (2014)                      |
| G410myrct35 | TrGC   | MYRCOOHISOPO2 + NO $\rightarrow$ .8 MYRCOOHISOPO + .8 NO <sub>2</sub> + .2 CH <sub>3</sub> COCH <sub>3</sub> + .2 SURCH3CHO + .2 ISOPBNO3                     | KR02N0                   | Taraborrelli (2014)                      |
| G410myrct36 | TrGC   | MYRCOOHISOPO2 $\rightarrow$ MYRCOOHHPALD + HO <sub>2</sub>                                                                                                    | K16HS                    | Taraborrelli (2014)*                     |

Table 1: Gas phase reactions (... continued)

| #           | labels | reaction                                                                                                                                                       | rate coefficient          | reference            |
|-------------|--------|----------------------------------------------------------------------------------------------------------------------------------------------------------------|---------------------------|----------------------|
| G410myrct37 | TrGC   | MYRCOOHISOPO $\rightarrow$ CH <sub>3</sub> COCH <sub>3</sub> + SURCH3CHO + .43 MVK + .27 MACR + .7 HCHO + .29 LHC4ACCHO + HO <sub>2</sub> + OH                 | KDEC                      | Taraborrelli (2014)  |
| G410myrct38 | TrGCJ  | MYRCOOHISOPOOH + h $\nu$ $\rightarrow$ MYRCOOHISOPO + OH                                                                                                       | 1.14*jx(ip_CH300H)        | Taraborrelli (2014)  |
| G410myrct39 | TrGCJ  | MYRCOOHISOPOOH + h $\nu$ $\rightarrow$ CH <sub>3</sub> COCH <sub>3</sub> + HO <sub>2</sub> + SURCH3CHO + .43 ISOPBOOH + .27 ISOPDOOH + .29 LISOPACOOH + OH     | 1.14*jx(ip_CH300H)        | Taraborrelli (2014)  |
| G410myrct40 | TrGCJ  | MYRCOOHHPALD + h $\nu$ $\rightarrow$ CH <sub>3</sub> COCH <sub>3</sub> + OH + SURCH3CHO + OH + ZCODC23DBCOOH + HO <sub>2</sub>                                 | J_HPALD                   | Taraborrelli (2014)  |
| G410myrct41 | TrGC   | MYRCOOHHPALD + OH $\rightarrow$ CH <sub>3</sub> COCH <sub>3</sub> + OH + SURCH3CHO + .3 C1ODC2O2C4OOH + .2 C1OOHC2O2C4OD + .3 C1ODC3O2C4OOH + .2 C1OOHC3O2C4OD | (kadt+kads)*acho*ach2ooh  | Taraborrelli (2014)  |
| G410myrct42 | TrGC   | SURCH3CHO + OH $\rightarrow$ SURCH3CO3 + H <sub>2</sub> O                                                                                                      | 4.4E-12*EXP(365./temp)    | Taraborrelli (2014)* |
| G410myrct43 | TrGC   | SURCH3CHO + h $\nu$ $\rightarrow$ HCHO + HO <sub>2</sub> + HO <sub>2</sub> + CO                                                                                | jx(ip_CH3CHO)             | Taraborrelli (2014)  |
| G410myrct44 | TrGC   | SURCH3CHO + NO <sub>3</sub> $\rightarrow$ HNO <sub>3</sub> + SURCH3CO3                                                                                         | KN03AL                    | Taraborrelli (2014)  |
| G410myrct45 | TrGC   | SURCH3CO3 $\rightarrow$ HCHO + HO <sub>2</sub> + CO <sub>2</sub>                                                                                               | 1.00E-11*0.7*R02          | Taraborrelli (2014)  |
| G410myrct46 | TrGC   | SURCH3CO3 $\rightarrow$ SURCH3CO2H                                                                                                                             | 1.00E-11*0.3*R02          | Taraborrelli (2014)  |
| G410myrct47 | TrGC   | SURCH3CO3 + HO <sub>2</sub> $\rightarrow$ OH + HCHO + HO <sub>2</sub> + CO <sub>2</sub>                                                                        | KAPH02*0.44               | Taraborrelli (2014)  |
| G410myrct48 | TrGC   | SURCH3CO3 + HO <sub>2</sub> $\rightarrow$ SURCH3CO3H                                                                                                           | KAPH02*0.41               | Taraborrelli (2014)  |
| G410myrct49 | TrGC   | SURCH3CO3 + HO <sub>2</sub> $\rightarrow$ SURCH3CO2H + O <sub>3</sub>                                                                                          | KAPH02*0.15               | Taraborrelli (2014)  |
| G410myrct50 | TrGC   | SURCH3CO3 + NO <sub>2</sub> $\rightarrow$ SURPAN                                                                                                               | k_CH3CO3_NO2              | Taraborrelli (2014)  |
| G410myrct51 | TrGC   | SURCH3CO3 + NO $\rightarrow$ NO <sub>2</sub> + HCHO + HO <sub>2</sub> + CO <sub>2</sub>                                                                        | KAPNO                     | Taraborrelli (2014)  |
| G410myrct52 | TrGC   | SURCH3CO3 + NO <sub>3</sub> $\rightarrow$ NO <sub>2</sub> + HCHO + HO <sub>2</sub> + CO <sub>2</sub>                                                           | KR02NO3*1.60              | Taraborrelli (2014)  |
| G410myrct53 | TrGC   | SURCH3CO2H + OH $\rightarrow$ HCHO + HO <sub>2</sub> + CO <sub>2</sub>                                                                                         | 4.2E-14*exp(850./temp)    | Taraborrelli (2014)* |
| G410myrct54 | TrGC   | SURCH3CO3H + h $\nu$ $\rightarrow$ HCHO + HO <sub>2</sub> + OH + CO <sub>2</sub>                                                                               | 1.14*jx(ip_CH300H)        | Taraborrelli (2014)  |
| G410myrct55 | TrGC   | SURCH3CO3H + OH $\rightarrow$ SURCH3CO3 + H <sub>2</sub> O                                                                                                     | 0.6*k_CH300H_OH           | Taraborrelli (2014)  |
| G410myrct56 | TrGC   | SURPAN $\rightarrow$ SURCH3CO3 + NO <sub>2</sub>                                                                                                               | k_PAN_M                   | Taraborrelli (2014)  |
| G410myrct57 | TrGC   | SURPAN + OH $\rightarrow$ HCHO + CO + NO <sub>2</sub>                                                                                                          | 9.50E-13*EXP(-650./temp)  | Taraborrelli (2014)  |
| G410afarn   | TrGC   | FARNESENE + OH $\rightarrow$ LFARNISOPO2                                                                                                                       | 2.7E-11*EXP(390./temp)    | Taraborrelli (2014)* |
| G410afarnt2 | TrGC   | FARNESENE + OH $\rightarrow$ LFARNO2                                                                                                                           | 2.*1.9E-11*exp(450./temp) | Taraborrelli (2014)* |
| G410afarnt3 | TrGC   | FARNESENE + O <sub>3</sub> $\rightarrow$ FARNCHO + .25 CH <sub>3</sub> COCH <sub>3</sub> + .75 OH + .75 CH <sub>3</sub> COCH <sub>2</sub> O <sub>2</sub>       | 6.51E-15*exp(-829./temp)  | Taraborrelli (2014)* |
| G410afarnt4 | TrGC   | FARNESENE + O <sub>3</sub> $\rightarrow$ MHO + MYRCCHO + .75 OH                                                                                                | 6.51E-15*exp(-829./temp)  | Taraborrelli (2014)* |
| G410afarnt5 | TrGNC  | FARNESENE + NO <sub>3</sub> $\rightarrow$ LFARNO2                                                                                                              | 2E-12+2*9.37E-12          | Taraborrelli (2014)* |



Table 1: Gas phase reactions (... continued)

| #            | labels | reaction                                                                                                       | rate coefficient            | reference            |
|--------------|--------|----------------------------------------------------------------------------------------------------------------|-----------------------------|----------------------|
| G410afarnt6  | TrGC   | LFARNO2 $\rightarrow$ LFARNO                                                                                   | 8.E-13*R02                  | Taraborrelli (2014)  |
| G410afarnt7  | TrGC   | LFARNO2 + HO <sub>2</sub> $\rightarrow$ LFARNOOH                                                               | KR02H02                     | Taraborrelli (2014)  |
| G410afarnt8  | TrGC   | LFARNO2 + NO $\rightarrow$ .75 LFARNO + .75 NO <sub>2</sub> + .25 LFARNONO2                                    | KR02N0                      | Taraborrelli (2014)  |
| G410afarnt9  | TrGCJ  | LFARNOOH + h $\nu$ $\rightarrow$ LFARNO + OH                                                                   | 1.14*jx(ip_CH300H)          | Taraborrelli (2014)  |
| G410afarnt10 | TrGC   | LFARNOOH + OH $\rightarrow$ MHOOOH + MYRCCHOISOPO2                                                             | 2.7E-11*EXP(390./temp)      | Taraborrelli (2014)  |
| G410afarnt11 | TrGC   | LFARNONO2 + OH $\rightarrow$ .5 MHO + .5 FARNCHO + MYRCISOPNO3                                                 | 2.*1.9E-11*exp(450./temp)   | Taraborrelli (2014)  |
| G410afarnt12 | TrGC   | LFARNO $\rightarrow$ .5 MHO + .5 MYRCCHO + .5 FARNCHO + .5 CH <sub>3</sub> COCH <sub>3</sub> + HO <sub>2</sub> | KDEC                        | Taraborrelli (2014)  |
| G410afarnt13 | TrGC   | LFARNISOPO2 $\rightarrow$ LFARNISOPO                                                                           | 1.E-12*R02                  | Taraborrelli (2014)  |
| G410afarnt14 | TrGC   | LFARNISOPO2 + HO <sub>2</sub> $\rightarrow$ LFARNISOPOOH                                                       | KR02H02                     | Taraborrelli (2014)  |
| G410afarnt15 | TrGC   | LFARNISOPO2 + NO $\rightarrow$ .75 LFARNISOPO + .75 NO <sub>2</sub> + .25 LFARNISOPNO3                         | KR02N0                      | Taraborrelli (2014)  |
| G410afarnt16 | TrGC   | LFARNISOPO2 $\rightarrow$ MYRCCHOHPALD + HO <sub>2</sub> + MHO                                                 | K16HS                       | Taraborrelli (2014)* |
| G410afarnt17 | TrGC   | LFARNISOPO $\rightarrow$ MHO + MYRCCHOISOPO                                                                    | KDEC                        | Taraborrelli (2014)  |
| G410afarnt18 | TrGC   | LFARNISOPNO3 + OH $\rightarrow$ MHO + HO <sub>2</sub> + ISOPBNO3                                               | kadt+kads                   | Taraborrelli (2014)  |
| G410afarnt19 | TrGC   | LFARNISOPOOH + h $\nu$ $\rightarrow$ LFARNISOPO + OH                                                           | 1.14*jx(ip_CH300H)          | Taraborrelli (2014)  |
| G410afarnt20 | TrGC   | LFARNISOPOOH + OH $\rightarrow$ MHO + MYRCCHOISOPO2                                                            | kadt+kads                   | Taraborrelli (2014)  |
| G410afarnt21 | TrGC   | LFARNISOPOOH + O <sub>3</sub> $\rightarrow$ MHO + MYRCCHOISOPO2 + .75 OH                                       | 2.*6.51E-15*exp(-829./temp) | Taraborrelli (2014)* |
| G410afarnt22 | TrGC   | FARNCHO + OH $\rightarrow$ FARNCHOO2                                                                           | 1.9E-11*exp(450./temp)      | Taraborrelli (2014)* |
| G410afarnt23 | TrGC   | FARNCHO + OH $\rightarrow$ FARNCHOISOPO2                                                                       | 2.7E-11*EXP(390./temp)      | Taraborrelli (2014)* |
| G410afarnt24 | TrGC   | FARNCHO + O <sub>3</sub> $\rightarrow$ OPA + MYRCCHO + .75 OH                                                  | 6.51E-15*exp(-829./temp)    | Taraborrelli (2014)* |
| G410afarnt25 | TrGNC  | FARNCHO + NO <sub>3</sub> $\rightarrow$ FARNCHOISOPO2                                                          | 2E-12                       | Taraborrelli (2014)* |
| G410afarnt26 | TrGNC  | FARNCHO + NO <sub>3</sub> $\rightarrow$ FARNCHOO2                                                              | 9.37E-12                    | Taraborrelli (2014)* |
| G410afarnt27 | TrGC   | FARNCHOO2 $\rightarrow$ FARNCHOO                                                                               | 8.E-13*R02                  | Taraborrelli (2014)  |
| G410afarnt28 | TrGC   | FARNCHOO2 + HO <sub>2</sub> $\rightarrow$ FARNCHOOOH                                                           | KR02H02                     | Taraborrelli (2014)  |
| G410afarnt29 | TrGC   | FARNCHOO2 + NO $\rightarrow$ .75 FARNCHOO + .75 NO <sub>2</sub> + .25 FARNCHONO3                               | KR02N0                      | Taraborrelli (2014)  |
| G410afarnt30 | TrGCJ  | FARNCHOOOH + h $\nu$ $\rightarrow$ FARNCHOO + OH                                                               | 1.14*jx(ip_CH300H)          | Taraborrelli (2014)  |
| G410afarnt31 | TrGC   | FARNCHOOOH + OH $\rightarrow$ OPA + HO <sub>2</sub> + MYRCCHOISOPO2                                            | 2.7E-11*EXP(390./temp)      | Taraborrelli (2014)* |
| G410afarnt32 | TrGC   | FARNCHONO3 + OH $\rightarrow$ OPA + MYRCISOPNO3                                                                | 1.9E-11*exp(450./temp)      | Taraborrelli (2014)* |
| G410afarnt33 | TrGC   | FARNCHOO $\rightarrow$ OPA + MYRCCHO + HO <sub>2</sub>                                                         | KDEC                        | Taraborrelli (2014)  |

Table 1: Gas phase reactions (... continued)

| #            | labels | reaction                                                                                                                                                                                                                                                              | rate coefficient                        | reference                                     |
|--------------|--------|-----------------------------------------------------------------------------------------------------------------------------------------------------------------------------------------------------------------------------------------------------------------------|-----------------------------------------|-----------------------------------------------|
| G410afarnt34 | TrGC   | FARNCHOISOPO2 $\rightarrow$ FARNCHOISOPO                                                                                                                                                                                                                              | 1.E-12*R02                              | Taraborrelli (2014)                           |
| G410afarnt35 | TrGC   | FARNCHOISOPO2 + HO <sub>2</sub> $\rightarrow$ FARNCHOISOPOOH                                                                                                                                                                                                          | KR02H02                                 | Taraborrelli (2014)                           |
| G410afarnt36 | TrGC   | FARNCHOISOPO2 + NO $\rightarrow$ .75 FARNCHOISOPO + .75 NO <sub>2</sub> + .25 FARNCHOISOPNO3                                                                                                                                                                          | KR02N0                                  | Taraborrelli (2014)                           |
| G410afarnt37 | TrGC   | FARNCHOISOPO2 $\rightarrow$ OPA + MYRCCHOHPALD + HO <sub>2</sub> + MHO                                                                                                                                                                                                | K16HS                                   | Taraborrelli (2014)*                          |
| G410afarnt38 | TrGC   | FARNCHOISOPO $\rightarrow$ OPA + MYRCCHOISOPO                                                                                                                                                                                                                         | KDEC                                    | Taraborrelli (2014)                           |
| G410afarnt39 | TrGC   | FARNCHOISOPNO3 + OH $\rightarrow$ OPA + HO <sub>2</sub> + ISOPBNO3                                                                                                                                                                                                    | kadt+kads                               | Taraborrelli (2014)                           |
| G410afarnt40 | TrGC   | FARNCHOISOPOOH + h $\nu$ $\rightarrow$ FARNCHOISOPO + OH                                                                                                                                                                                                              | 1.14*jx(ip_CH300H)                      | Taraborrelli (2014)                           |
| G410afarnt41 | TrGC   | FARNCHOISOPOOH + OH $\rightarrow$ OPA + MYRCCHOISOPO2                                                                                                                                                                                                                 | kadt+kads                               | Taraborrelli (2014)                           |
| G410afarnt42 | TrGC   | FARNCHOISOPOOH + O <sub>3</sub> $\rightarrow$ OPA + MYRCCHOISOPO2 + .75 OH                                                                                                                                                                                            | 6.51E-15*exp(-829./temp)                | Taraborrelli (2014)                           |
| G410afarnt43 | TrGC   | MHO + OH $\rightarrow$ MHOO2                                                                                                                                                                                                                                          | 1.37E-10                                | Smith et al. (1996), Taraborrelli (2014)*     |
| G410afarnt44 | TrGC   | MHO + O <sub>3</sub> $\rightarrow$ .25 CH <sub>3</sub> COCH <sub>3</sub> + .125 OPA + .25 GLYOX + .25 CH <sub>3</sub> COCH <sub>2</sub> O <sub>2</sub> + .125 H <sub>2</sub> O <sub>2</sub> + .75 OH + .75 CH <sub>3</sub> COCH <sub>2</sub> O <sub>2</sub> + .75 OPA | 3.9E-16                                 | Grosjean et al. (1996), Taraborrelli (2014)*  |
| G410afarnt45 | TrGC   | MHO + NO <sub>3</sub> $\rightarrow$ MHOO2                                                                                                                                                                                                                             | 7E-12                                   | Smith et al. (1996), Taraborrelli (2014)      |
| G410afarnt46 | TrGC   | MHOO2 $\rightarrow$ CH <sub>3</sub> COCH <sub>3</sub> + OPA + HO <sub>2</sub>                                                                                                                                                                                         | 8.E-13*R02                              | Taraborrelli (2014)                           |
| G410afarnt47 | TrGC   | MHOO2 + HO <sub>2</sub> $\rightarrow$ MHOOOH                                                                                                                                                                                                                          | KR02H02                                 | Taraborrelli (2014)                           |
| G410afarnt48 | TrGC   | MHOO2 + NO $\rightarrow$ .25 MHONO3 + .75 CH <sub>3</sub> COCH <sub>3</sub> + .75 OPA + .75 HO <sub>2</sub> + .75 NO <sub>2</sub>                                                                                                                                     | KR02N0                                  | Taraborrelli (2014)                           |
| G410afarnt49 | TrGC   | MHOOOH + OH $\rightarrow$ MHOO2                                                                                                                                                                                                                                       | 0.6*k_CH300H_OH                         | Taraborrelli (2014)                           |
| G410afarnt50 | TrGC   | MHOOOH + OH $\rightarrow$ MHOCODOOH + HO <sub>2</sub>                                                                                                                                                                                                                 | kt*ftoh*falk*falk                       | Taraborrelli (2014)                           |
| G410afarnt51 | TrGCJ  | MHOOOH + h $\nu$ $\rightarrow$ CH <sub>3</sub> COCH <sub>3</sub> + OPA + OH                                                                                                                                                                                           | 1.14*jx(ip_CH300H)                      | Taraborrelli (2014)                           |
| G410afarnt52 | TrGCJ  | MHOCODOOH + h $\nu$ $\rightarrow$ CH <sub>3</sub> COCH <sub>3</sub> + CH <sub>3</sub> COCH <sub>2</sub> O <sub>2</sub> + SURCH3CO3 + OH                                                                                                                               | 1.14*jx(ip_CH300H)+2.77*jx(ip_HOCH2CHO) | Taraborrelli (2014)*                          |
| G410afarnt53 | TrGC   | MHONO3 + OH $\rightarrow$ MHOCODNO3 + HO <sub>2</sub>                                                                                                                                                                                                                 | kt*ftoh*falk*fch2ono2                   | Taraborrelli (2014)                           |
| G410afarnt54 | TrGC   | MHOCODNO3 + h $\nu$ $\rightarrow$ CH <sub>3</sub> COCH <sub>3</sub> + NO <sub>2</sub> + CH <sub>3</sub> COCH <sub>2</sub> O <sub>2</sub> + SURCH3CO3                                                                                                                  | 2.84*J_IC3H7N03                         | Taraborrelli (2014)                           |
| G410afarnt55 | TrGC   | OPA + OH $\rightarrow$ CH <sub>3</sub> COCH <sub>2</sub> O <sub>2</sub> + SURCH3CO3                                                                                                                                                                                   | 2.E-11                                  | Fruekilde et al. (1997), Taraborrelli (2014)* |

Table 1: Gas phase reactions (... continued)

| #            | labels | reaction                                                                                                     | rate coefficient                                  | reference           |
|--------------|--------|--------------------------------------------------------------------------------------------------------------|---------------------------------------------------|---------------------|
| G410afarnt56 | TrGCJ  | $\text{OPA} + h\nu \rightarrow \text{CH}_3\text{COCH}_2\text{O}_2 + \text{SURCH}_3\text{CO}_3 + \text{HO}_2$ | $\text{jx(ip\_CH3CHO)} + \text{jx(ip\_CH3COCH3)}$ | Taraborrelli (2014) |

\*Notes:

Rate coefficients for three-body reactions are defined via the function `k_3rd`( $T, M, k_0^{300}, n, k_{\text{inf}}^{300}, m, f_c$ ). In the code, the temperature  $T$  is called `temp` and the concentration of “air molecules”  $M$  is called `cair`. Using the auxiliary variables  $k_0(T)$ ,  $k_{\text{inf}}(T)$ , and  $k_{\text{ratio}}$ , `k_3rd` is defined as:

$$k_0(T) = k_0^{300} \times \left( \frac{300\text{K}}{T} \right)^n \quad (1)$$

$$k_{\text{inf}}(T) = k_{\text{inf}}^{300} \times \left( \frac{300\text{K}}{T} \right)^m \quad (2)$$

$$k_{\text{ratio}} = \frac{k_0(T)M}{k_{\text{inf}}(T)} \quad (3)$$

$$\text{k\_3rd} = \frac{k_0(T)M}{1 + k_{\text{ratio}}} \times f_c \left( \frac{1}{1 + (\log_{10}(k_{\text{ratio}}))^2} \right) \quad (4)$$

A similar function, called `k_3rd_iupac` here, is used by Atkinson et al. (2005) for three-body reactions. It has the same function parameters as `k_3rd` and it is defined as:

$$k_0(T) = k_0^{300} \times \left( \frac{300\text{K}}{T} \right)^n \quad (5)$$

$$k_{\text{inf}}(T) = k_{\text{inf}}^{300} \times \left( \frac{300\text{K}}{T} \right)^m \quad (6)$$

$$k_{\text{ratio}} = \frac{k_0(T)M}{k_{\text{inf}}(T)} \quad (7)$$

$$N = 0.75 - 1.27 \times \log_{10}(f_c) \quad (8)$$

$$\text{k\_3rd\_iupac} = \frac{k_0(T)M}{1 + k_{\text{ratio}}} \times f_c \left( \frac{1}{1 + (\log_{10}(k_{\text{ratio}}/N))^2} \right) \quad (9)$$

Structure Activity Relationship (SAR) for estimation of rate constants as developed by Taraborrelli (2010).

SAR for H-abstraction:

base rate constants

$$ks = 8.42E - 13 \quad (10)$$

$$kt = 1.75E - 12 \quad (11)$$

$$kp = 1.24E - 13 \quad (12)$$

$$kcho = 5.55E - 12 \times \text{EXP}(311/T) * .95 \quad (13)$$

$$krohro = 1.6E - 13 \quad (14)$$

$$kco2h = .66 \times 4.2E - 14 \times \exp(850/T) \quad (15)$$

activation factors (parameter names starting with f)

$$fsoh = 3.44 \quad (16)$$

$$ftoh = 2.68 \quad (17)$$

$$fsooh = 7. \quad (18)$$

$$ftooh = 7. \quad (19)$$

$$fono2 = 0.04 \quad (20)$$

$$fch2ono2 = 0.2 \quad (21)$$

$$fcpan = .25 \quad (22)$$

$$fallyl = 3.6 \quad (23)$$

$$falk = 1.23 \quad (24)$$

$$fcho = 0.55 \quad (25)$$

$$fco2h = 1.67 \quad (26)$$

$$fco = 0.73 \quad (27)$$

$$fo = 8.15 \quad (28)$$

$$fpch2oh = 1.29 \quad (29)$$

$$ftch2oh = 0.53 \quad (30)$$

$$kadp = 0.45E - 11 \quad (31)$$

$$kads = 3.0E - 11 \quad (32)$$

$$kadtt = 5.5E - 11 \quad (33)$$

$$kadsecprim = 3.0E - 11 \quad (34)$$

$$kadtertprim = 5.7E - 11 \quad (35)$$

activation factors (parameter names starting with a)

$$apan = 0.56 \quad (36)$$

$$acho = 0.31 \quad (37)$$

$$acoch3 = 0.76 \quad (38)$$

$$ach2ono2 = 0.47 \quad (39)$$

$$ach2oh = 1.7 \quad (40)$$

$$ach2ooh = 0.21 \quad (41)$$

$$acoh = 2.2 \quad (42)$$

$$acooH = 2.2 \quad (43)$$

$$aco2h = 0.25 \quad (44)$$

G2110: The rate coefficient is: `k_HO2_HO2 = (1.5E-12*EXP(19./temp)+1.7E-33*EXP(1000./temp)*cair)*(1.+1.4E-21*EXP(2200./temp)*C(ind_H2O))`. The value for the first (pressure-independent) part is from Christensen et al. (2002), the water term from Kircher and Sander (1984).

G3109: The rate coefficient is: `k_NO3_NO2 = k_3rd(temp, cair, 2.E-30, 4.4, 1.4E-12, 0.7, 0.6)`.

G3110: The rate coefficient is defined as backward reaction divided by equilibrium constant.

G3203: The rate coefficient is: `k_NO2_HO2 = k_3rd(temp, cair, 1.8E-31, 3.2, 4.7E-12, 1.4, 0.6)`.

G3206: The rate coefficient is: `k_HNO3_OH = 2.4E-14 * EXP(460./temp) + 1./ ( 1./`

base rate constants

$(6.5\text{E-}34 * \text{EXP}(1335./\text{temp}) * \text{cair}) + 1./$   
 $(2.7\text{E-}17 * \text{EXP}(2199./\text{temp}))$  )

G3207: The rate coefficient is defined as backward reaction divided by equilibrium constant.

G4103a: Sander et al. (2006) recommend a zero product yield for HCHO. G4103b: Sander et al. (2006) recommend a zero product yield for HCHO.

G4107: The rate coefficient is:  $k_{\text{CH3OOH\_OH}} = 3.8\text{E-}12 * \text{EXP}(200./\text{temp})$ .

G4109: The same temperature dependence assumed as for  $\text{CH}_3\text{CHO} + \text{NO}_3$ .

G4201e: The product distribution is from Rickard and Pascoe (2009), after substitution of the Criegee intermediate by its decomposition products.

G4206: The product  $\text{C}_2\text{H}_5\text{OH}$ , which reacts only with OH, is substituted by its degradation products  $\approx 0.1 \text{HOCH}_2\text{CH}_2\text{O}_2 + 0.9 \text{CH}_3\text{CHO} + 0.9 \text{HO}_2$ .

G4207: The rate constant  $8.01\text{E-}12$  is for the H abstraction in alpha to the  $-\text{OOH}$  group (Rickard and Pascoe, 2009) and  $0.6 * k_{\text{CH3OOH\_OH}}$  is for the  $\text{C}_2\text{H}_5\text{O}_2$  channel. The branching ratios are calculated from the terms of the rate coefficient at 298 K.

G4211et1: personal communication C. Gross (MPICH)  
G4211et2: personal communication C. Gross (MPICH)  
G4211et3: personal communication C. Gross (MPICH)

G4213: The rate coefficient is:  $k_{\text{CH3CO3\_NO2}} = k_{\text{3rd}}(\text{temp}, \text{cair}, 9.7\text{E-}29, 5.6, 9.3\text{E-}12, 1.5, 0.6)$ .

G4218: The rate coefficient is the same as for the  $\text{CH}_3\text{O}_2$  channel in G4107 ( $\text{CH}_3\text{OOH} + \text{OH}$ ).

G4221: The rate coefficient  $\text{isk}_{\text{PAN\_M}} = k_{\text{CH3CO3\_NO2}}/9.\text{E-}29 * \text{EXP}(-14000./\text{temp})$ , i.e. the rate coefficient is defined as backward reaction divided by equilibrium constant.

G4226ea: personal communication C. Gross (MPICH)

G4226eb: personal communication C. Gross (MPICH)

G4226ec: personal communication C. Gross (MPICH)

G4243: Orlando et al. (1998a) estimated that about 25% of the  $\text{HOCH}_2\text{CH}_2\text{O}$  in this reaction is produced with sufficient excess energy that it decomposes promptly. The decomposition products are  $2 \text{HCHO} + \text{HO}_2$ .

G4255et2: personal communication C. Gross (MPICH)

G4255et3: personal communication C. Gross (MPICH)

G4260et2: personal communication C. Gross (MPICH)

G4260et3: personal communication C. Gross (MPICH)

G4266e:  $0.4 \text{CO}_2\text{HCH}_2\text{O}_2$  approximated to  $\text{HOOCH}_2\text{CO}_2\text{H}$

G4300: The product  $\text{NC}_3\text{H}_7\text{O}_2$  is substituted with its degradation products  $\text{C}_2\text{H}_5\text{O}_2 + \text{CO}_2 + \text{HO}_2$ .

G4304: The value for the generic  $\text{RO}_2 + \text{HO}_2$  reaction from Atkinson (1997) is used here.

G4306: The MCM (Rickard and Pascoe, 2009) products are  $0.2 \text{IPROPOL} + 0.2 \text{CH}_3\text{COCH}_3 + 0.6 \text{IC}_3\text{H}_7\text{O}$ .  $\text{IPROPOL}$  and  $\text{IC}_3\text{H}_7\text{O}$  are substituted with their degradation products. We assume  $\text{IPROPOL}$  to be oxidized entirely to  $\text{CH}_3\text{COCH}_3 + \text{HO}_2$  by OH.  $\text{IC}_3\text{H}_7\text{O} + \text{O}_2$  produces the same products.

G4307: Analogous to G4207 for both rate coefficient and branching ratios.

G4315a: The same value as for G4107 ( $\text{CH}_3\text{OOH} + \text{OH}$ ) is used, multiplied by the branching ratio of the  $\text{CH}_3\text{O}_2$  channel.

G4343e: k for the major channel of  $\text{ACETOL} + \text{OH}$

G4353e:  $.28 \text{CH}_3\text{CHO}_2\text{CO}_2\text{H}$  yield approximated by  $.14 \text{CH}_3\text{COCO}_2\text{H} + .14 \text{CH}_3\text{CHO}$

G4354e: k for  $(\text{CH}_3)_2\text{CCO}$  adjusted

G4355e: k for  $(\text{CH}_3)_2\text{CCO}$  adjusted

G4400:  $\text{LC}_4\text{H}_9\text{O}_2$  represents  $0.127 \text{NC}_4\text{H}_9\text{O}_2 + 0.873 \text{SC}_4\text{H}_9\text{O}_2$ .

G4401:  $\text{NC}_4\text{H}_9\text{O}$  and  $\text{SC}_4\text{H}_9\text{O}$  are substituted with  $2 \text{CO}_2 + \text{C}_2\text{H}_5\text{O}_2$  and  $0.636 \text{MEK} + \text{HO}_2$  and  $0.364 \text{CH}_3\text{CHO} + \text{C}_2\text{H}_5\text{O}_2$ , respectively. The stoichiometric coefficients on the right side are weighted averages.

G4403: The alkyl nitrate yield is the weighted average yield for the two isomers forming from  $\text{NC}_4\text{H}_9\text{O}_2$  and  $\text{SC}_4\text{H}_9\text{O}_2$ .

G4404: The product distribution is the weighted average of the single isomer hydroperoxides. It is calculated from the rate constants of single channels and the ratio of the isomers  $\text{NC}_4\text{H}_9\text{O}_2$  and  $\text{SC}_4\text{H}_9\text{O}_2$ . The overall rate constant for this reaction is calculated as weighted average of the channels rate constants. The relative weight of the products from  $\text{NC}_4\text{H}_9\text{OOH}$  and  $\text{SC}_4\text{H}_9\text{OOH}$  are then 0.0887 and 0.9113. The channels producing  $\text{RO}_2$  are given the rate coefficient  $0.6 * k_{\text{CH3OOH\_OH}}$  as for G4107. For  $\text{NC}_4\text{H}_9\text{OOH}$  the products are  $0.327 \text{NC}_4\text{H}_9\text{O}_2 + 0.673 \text{C}_3\text{H}_7\text{CHO} + 0.673 \text{OH}$ .  $\text{C}_3\text{H}_7\text{CHO}$  is then substituted with  $2 \text{CO}_2 + \text{C}_2\text{H}_5\text{O}_2$ . Hence,  $0.327 \text{NC}_4\text{H}_9\text{O}_2 + 1.346 \text{CO}_2 + 0.673 \text{C}_2\text{H}_5\text{O}_2 + 0.673 \text{OH}$ . For  $\text{SC}_4\text{H}_9\text{OOH}$  the products are  $0.219 \text{SC}_4\text{H}_9\text{O}_2 + 0.781 \text{MEK} + 0.781 \text{OH}$ .

G4406e: Lumped products from Taraborrelli et al. (2009).

G4413:  $\text{LMEKO}_2$  represents  $0.459 \text{MEKAO}_2 + 0.462 \text{MEKBO}_2 + 0.079 \text{MEKCO}_2$ .

G4415: Alkyl nitrate formation is neglected. The products of  $\text{MEKAO}$  and  $\text{MEKCO}$  are substituted with  $\text{HCHO} + \text{CO}_2 + \text{HOCH}_2\text{CH}_2\text{O}_2$  and  $\text{HCHO} + \text{CO}_2 + \text{C}_2\text{H}_5\text{O}_2$ .

G4416:  $\text{LMEKOOH}$  is assumed having the composition  $0.459 \text{MEKAOOH} + 0.462 \text{MEKBOOH} + 0.079 \text{MEKCOOH}$ .  $\text{MEKAOOH} + \text{OH}$  gives  $0.89 \text{CO}_2\text{C}_3\text{CHO} +$

0.89 OH + 0.11 MEKAO2 + H<sub>2</sub>O. CO2C3CHO is substituted with CH<sub>3</sub>COCH<sub>2</sub>O<sub>2</sub> + CO<sub>2</sub> and the products become 0.89 CH<sub>3</sub>COCH<sub>2</sub>O<sub>2</sub> + 0.89 CO<sub>2</sub> + 0.89 OH + 0.11 MEKAO2 + H<sub>2</sub>O. MEKBOOH + OH gives 0.758 BIACET + 0.758 OH + 0.242 MEKBO2 + H<sub>2</sub>O. MEKCOOH + OH gives 0.614 EGLYOX + 0.614 OH + 0.386 MEKCO2 + H<sub>2</sub>O. EGLYOX is substituted with C<sub>2</sub>H<sub>5</sub>O<sub>2</sub> + 2 CO<sub>2</sub> and the products become 0.614 C<sub>2</sub>H<sub>5</sub>O<sub>2</sub> + 1.228 CO<sub>2</sub> + 0.614 OH + 0.386 MEKCO2 + H<sub>2</sub>O.

G4417: The rate coefficient is the combination of the ones for the two isomers weighted by the relative abundances for NC4H9NO3 and SC4H9NO3, respectively. Product distribution is calculated accordingly. NC4H9NO3 + OH gives C3H7CHO + NO<sub>2</sub> + H<sub>2</sub>O with C3H7CHO being substituted with 2 CO<sub>2</sub> + C<sub>2</sub>H<sub>5</sub>O<sub>2</sub>. After substitution is obtained 2 CO<sub>2</sub> + C<sub>2</sub>H<sub>5</sub>O<sub>2</sub> + NO<sub>2</sub> + H<sub>2</sub>O. SC4H9NO3 + OH gives MEK + NO<sub>2</sub> + H<sub>2</sub>O. For the product distribution NC4H9NO3 and SC4H9NO3 account for 0.08577 and 0.91423, respectively.

G4419: The same value as for PAN is assumed.

G4420: Products are as in G4415. Only the main channels for each isomer are considered. Rate constant is the weighted average for the isomers.

G4437e: LHMVKABO2 is a lumped species of virtual composition 0.3 HMKVKA02 + 0.7 HMKVKBO2. The products are the weighted average for the permutation reactions of each single RO2 in the MCM (Rickard and Pascoe, 2009).

G4439ea: products are the weighted average for the decomposition of 0.3 HMKVKA0 + 0.7 HMKVKBO.

G4440e: as for G4439ea

G4441e: The rate coefficient and products are 30% for HMKVKA0OH and 70% for HMKVKBOOH.

G4455: CH3COCOCO3H assumed to photolyse quickly and give CH3CO3 + CO + CO2 + OH

G4462e: EZCH3CO2CHCHO 90:10 mixture of the Z- and E-isomer, CH3COCHO2CHO → .1 CH3CO3 + .1 GLYOX + .9 CH3COCHOOHCHO → .1 CH3CO3 + .1 GLYOX + .9 CH3COCOCHO → CH3CO3 + .1 GLYOX + 1.8 CO + .9 HO2;  $k_{H-shift}^{1,6}$

G4463e:  $k_{H-shift}^{1,6}$

G4500e: MVKO2 substituted with HCHO + ACO3 = 1.33 HCHO + .67 HCOCH2O2 + .33 CO

G4501e: coefficients from Paulot et al(2009)ACP

G4503e: k=.3E-12\*.77+1.4E-12\*.23

G4504e: k=1.5E-12\*2.

G4505e: k=.3E-12\*.46+1.E-12\*.54

G4506e: k=1.5E-12\*2.

G4507e: eisopao2 60percent zisopao2 40percent, MIME species

G4508e: as for G4507e

G4509e: eisopco2 42percent and zisopao2 58percent

G4510e: as for G4509e

G4511e:  $k_{H-shift}^{1,6}$

G4512e:  $k_{H-shift}^{1,6}$

G4521ec: k parent alkene, branching from Rickard et al(1999)

G45222: HYBIACETOOA approximated to yield BIACETOH only, CH3COCHOOHCH2OH's main reaction with OH yields BIACETOH recycling OH → substitution with BIACETOH

G4537e: O2NOCH2COCH2O2 = NO2 + 2 HCHO + CO2

G4550e: LC578OOH = .6 C57OOH + .4 C58OOH

G4550et2: LC578OOH = .6 C57OOH + .4 C58OOH

G4551e: Peroxy vinyl radical chemistry neglected

G4552e: Peroxy vinyl radical chemistry neglected

G4553e: Peroxy vinyl radical chemistry neglected

G4555e: Peroxy vinyl radical chemistry neglected

G4577et3: from MIME ZCODC23DBCOOH = 0.64 ZC1ODC23DBC4OOH + 0.36 ZC1OOHC23DBC4OD, HOOCH2COCH2O2 substituted with HCO-COCH2OOH

G4581et8: C1ODC3OOHC4OOH → C1ODC3ODC4OOH → .5 CH3CO3 + .5 CO + .5 MGLYOX + .5 HO2 + HOOCH2CO3

G4581et10: C1ODC3OOHC4OD + OH → .25 C1ODC3ODC4OD + .375 CO + .375 CH3COCOCHO + .375 CO2 + .375 HCOCOHCH3CHO → .25(MGLYOX + 2 CO + 2 HO2) + .375 CO + .375(CH3CO3 + 2 CO + HO2) + .375 CO2 + .375(MGLYOX + CO + 2 HO2)

G4582e:  $k_{H-shift}^{1,6}$

G4585et3: approximation H-abstraction only at C1

G4598et3: ZC1O3HC23DBC4OD 62percent G4598et4: HCOCOHCH3CHO substituted with CH3COCHOH + CO + HO2

G4136: CH3COCH2OOCH2CO3 → CH3CO3 + CO2 + 2 HCHO

G45mbo11: approximated to yield only MBOACO

G45mbo15: approx. not as in MCM!!!

G45mbo43: NO3CH2CO3 = HCHO + CO2 + NO2 following to Paulot et al(2009)

G410apin1: H-abstraction channels neglected, branching ratios re-scaled. G410apin2: H-abstraction channels neglected, branching ratios re-scaled. G410apin3: H-abstraction channels neglected, branching ratios re-scaled.

G410apint150: endo-cyclic vinyl ROOH assumed not be formed

G410apint162: C920CO3, C109CO, C109OH neglected

G410apint191: C811NO3 neglected

G410apint196: C812OH neglected

G410apint201: C813OH neglected

G410apint202: C813NO3 neglected

G410apint237: C512OH and CO13C4CHO neglected

G410apint239: C512NO3 neglected

G410apint242: C513OH + C513CO neglected

G410apint277: C33CO is called HCOCOCHO here

G410apint295: NC101CO substituted with C96CO3

G410bpin: BPINBO2 minor and similar to BPINAO2, peroxy ring closure of BPINCO2 is 0.6/s fast and traditional chemistry is neglected BPINCO2=LVROO6R1O2. G410bpint2: BPINBO2 minor and similar to BPINAO2, peroxy ring closure of BPINCO2 is 0.6/s fast and traditional chemistry is neglected BPINCO2=LVROO6R1O2.

G410bpint14: 1,5-H-shift

G410bpint19: LVROO6R13OO formation neglected

G410bpint20: traditional reactions neglected because of complexity

G410bpint40: .167 is for the neglected lactone stemming from the dioxirane as C8BC

G410bpint61: BPINBNO3 produced but approximated by BPINANO3

G410apint296: 2- and 3-CARENE together treated as the more emitted 3-CARENE, being similar to AP-INENE and assumed to yield the same products.

G410apint303: endo-cyclic vinyl ROOH assumed not be formed

G410myrct7: 20percent alkylnitrate yield like for AP-INENE

G410myrct15:  $k_{H-shift}^{1,6}$

G410myrct29:  $k_{H-shift}^{1,6}$

G410myrct36:  $k_{H-shift}^{1,6}$

G410myrct53: k acetic acid + OH

G410myrct42: Surrogate acetaldehyde.

G410afarn: k for addition to the isoprene unit

G410afarnt2: k for 2-methyl-2-butene

G410afarnt3: O3 + outer double bond k for 2-methyl-2-butene, OH-yield might be much lower

G410afarnt4: O3 + inner double bond, k for 2-methyl-2-butene, MYRCCHO approximation, OH-yield might be much lower

G410afarnt5: k sum of 4-methylhexa-3,5-dienal (Baker et al., 2004) and twice 2-methyl-2-butene.

G410afarnt16:  $k_{H-shift}^{1,6}$

G410afarnt21: k for 2-methyl-2-butene

G410afarnt22: k for 2-methyl-2-butene

G410afarnt23: k for addition to the isoprene unit

G410afarnt24: k for 2-methyl-2-butene

G410afarnt25: k of 4-methylhexa-3,5-dienal (Baker et al., 2004).

G410afarnt26: k of 2-methyl-2-butene

G410afarnt31: k for addition to the isoprene unit

G410afarnt32: k of 2-methyl-2-butene

G410afarnt37:  $k_{H-shift}^{1,6}$

G410afarnt43: 1.57E-10 for k was relative to k(trans-2-butene), with the new k=5.662E-11(IUPAC), k(MHO+OH) is 13percent lower

G410afarnt44: .25 GLYOX + .25 CH3COCH2O2 maor products of CH3OCCH2CHO2CHO ox.

G410afarnt52: CO2H3CO3 approximation

G410afarnt55: Approximation: OPACO3 is CH3COCH2O2 + SURCH3CO3.

Table 2: Photolysis reactions

| #        | labels  | reaction                                                                              | rate coefficient                   | reference                  |
|----------|---------|---------------------------------------------------------------------------------------|------------------------------------|----------------------------|
| J1000    | StTrGJ  | $O_2 + h\nu \rightarrow O(^3P) + O(^3P)$                                              | jx(ip_02)                          | see note                   |
| J1001a   | StTrGJ  | $O_3 + h\nu \rightarrow O(^1D)$                                                       | jx(ip_01D)                         | see note                   |
| J1001b   | StTrGJ  | $O_3 + h\nu \rightarrow O(^3P)$                                                       | jx(ip_03P)                         | see note                   |
| J2101    | StTrGJ  | $H_2O_2 + h\nu \rightarrow 2 OH$                                                      | JX(ip_H202)                        | see note                   |
| J3101    | StTrGNJ | $NO_2 + h\nu \rightarrow NO + O(^3P)$                                                 | jx(ip_N02)                         | see note                   |
| J3103a   | StTrGNJ | $NO_3 + h\nu \rightarrow NO_2 + O(^3P)$                                               | jx(ip_N020)                        | see note                   |
| J3103b   | StTrGNJ | $NO_3 + h\nu \rightarrow NO$                                                          | jx(ip_N002)                        | see note                   |
| J3104a   | StTrGNJ | $N_2O_5 + h\nu \rightarrow NO_2 + NO_3$                                               | jx(ip_N205)                        | see note                   |
| J3200    | TrGJ    | $HONO + h\nu \rightarrow NO + OH$                                                     | JX(ip_H0N0)                        | see note                   |
| J3201    | StTrGNJ | $HNO_3 + h\nu \rightarrow NO_2 + OH$                                                  | JX(ip_HN03)                        | see note                   |
| J3202    | StTrGNJ | $HNO_4 + h\nu \rightarrow .667 NO_2 + .667 HO_2 + .333 NO_3 + .333 OH$                | JX(ip_HN04)                        | see note                   |
| J4100e   | StTrGJ  | $CH_3OOH + h\nu \rightarrow HCHO + OH + HO_2$                                         | 1.14*jx(ip_CH300H)                 | see note                   |
| J4101a   | StTrGJ  | $HCHO + h\nu \rightarrow H_2 + CO$                                                    | jx(ip_COH2)                        | see note                   |
| J4101b   | StTrGJ  | $HCHO + h\nu \rightarrow H + CO + HO_2$                                               | jx(ip_CH0H)                        | see note                   |
| J4104e   | StTrGJ  | $HOCH_2OOH + h\nu \rightarrow OH + HO_2 + HCOOH$                                      | 1.14*jx(ip_CH300H)                 | see note                   |
| J4200e   | TrGCJ   | $C_2H_5OOH + h\nu \rightarrow CH_3CHO + HO_2 + OH$                                    | 1.14*jx(ip_CH300H)                 | see note                   |
| J4201    | TrGCJ   | $CH_3CHO + h\nu \rightarrow CH_3O_2 + HO_2 + CO$                                      | jx(ip_CH3CHO)                      | see note                   |
| J4202e   | TrGCJ   | $CH_3C(O)OOH + h\nu \rightarrow CH_3O_2 + OH + CO_2$                                  | 1.14*jx(ip_CH3C03H)                | see note                   |
| J4204e   | TrGNJCJ | $PAN + h\nu \rightarrow .6 CH_3C(O)OO + .6 NO_2 + .4 CH_3O_2 + .4 CO_2 + .4 NO_3$     | jx(ip_PAN)                         | see note                   |
| J4205ae  | TrGCJ   | $HOCH_2CHO + h\nu \rightarrow HCHO + 2 HO_2 + CO$                                     | jx(ip_HOCH2CHO)*0.70               | Taraborrelli (2014)        |
| J4205be  | TrGCJ   | $HOCH_2CHO + h\nu \rightarrow 1.16 OH + .84 HCOCH_2O_2 + .1 HCHO + .1 CO + .06 GLYOX$ | jx(ip_HOCH2CHO)*0.15               | Taraborrelli (2014)        |
| J4205ce  | TrGCJ   | $HOCH_2CHO + h\nu \rightarrow CH_3OH + CO$                                            | jx(ip_HOCH2CHO)*0.15               | Taraborrelli (2014)        |
| J4206e   | TrGCJ   | $HOCH_2CHO + h\nu \rightarrow OH + HCHO + CO + HO_2$                                  | 1.14*jx(ip_CH300H)+jx(ip_HOCH2CHO) | Taraborrelli (2014)        |
| J4206et2 | TrGCJ   | $HOCH_2CO_3H + h\nu \rightarrow HCHO + HO_2 + OH + CO_2$                              | 1.14*jx(ip_CH300H)                 | Rickard and Pascoe (2009)* |
| J4207    | TrGCJ   | $PHAN + h\nu \rightarrow HOCH_2CO_3 + NO_2$                                           | jx(ip_PAN)                         | see note                   |
| J4208    | TrGCJ   | $GLYOX + h\nu \rightarrow 2 CO + 2 HO_2$                                              | jx(ip_GLYOX)                       | see note                   |
| J4209    | TrGNJCJ | $HCOCO_2H + h\nu \rightarrow 2 HO_2 + CO + CO_2$                                      | jx(ip_MGLYOX)                      | Rickard and Pascoe (2009)* |
| J4210e   | TrGNJCJ | $HCOCO_3H + h\nu \rightarrow HO_2 + CO + OH + CO_2$                                   | 1.14*jx(ip_CH300H)+jx(ip_HOCH2CHO) | Rickard and Pascoe (2009)* |



Table 2: Photolysis reactions (... continued)

| #      | labels | reaction                                                                                                                                                                                             | rate coefficient                 | reference                   |
|--------|--------|------------------------------------------------------------------------------------------------------------------------------------------------------------------------------------------------------|----------------------------------|-----------------------------|
| J4211e | TrGCJ  | HYETHO2H + $h\nu$ → HOCH <sub>2</sub> CH <sub>2</sub> O + OH                                                                                                                                         | 1.14*jx(ip_CH300H)               | Rickard and Pascoe (2009)*  |
| J4212  | TrGCJ  | ETHOHNO3 + $h\nu$ → HO <sub>2</sub> + 2 HCHO + NO <sub>2</sub>                                                                                                                                       | J_IC3H7N03                       | see note                    |
| J4213e | TrGCJ  | HOCH2CO3H + $h\nu$ → OH + HCHO + CO <sub>2</sub> + OH                                                                                                                                                | 2*1.14*jx(ip_CH300H)             | Taraborrelli (2014)         |
| J4214e | TrGC   | HOCH2CO2H + $h\nu$ → OH + HCHO + HO <sub>2</sub> + CO <sub>2</sub>                                                                                                                                   | 1.14*jx(ip_CH300H)               | Taraborrelli (2014)         |
| J4215e | TrGC   | CH2CO + $h\nu$ → .4 CO <sub>2</sub> + .8 H + .34 CO + .34 OH + .34 HO <sub>2</sub><br>+ .16 HCHO + .16 O( <sup>3</sup> P) + .1 HCOOH + CO                                                            | J_ketene* 0.36                   | Taraborrelli (2014)         |
| J4216e | TrGC   | CH3CHOHOOH + $h\nu$ → CH <sub>3</sub> O <sub>2</sub> + HCOOH + OH                                                                                                                                    | 1.14*jx(ip_CH300H)               | Taraborrelli (2014)         |
| J4217e | TrGCJ  | NO3CH2CHO + $h\nu$ → HO <sub>2</sub> + CO + HCHO + NO <sub>2</sub>                                                                                                                                   | 1.59*J_IC3H7N03+jx(ip_CH3C0CH3)  | Taraborrelli (2014)         |
| J4300e | TrGCJ  | iC <sub>3</sub> H <sub>7</sub> OOH + $h\nu$ → CH <sub>3</sub> COCH <sub>3</sub> + HO <sub>2</sub> + OH                                                                                               | 1.14*jx(ip_CH300H)               | von Kuhlmann (2001)*        |
| J4301  | TrGCJ  | CH <sub>3</sub> COCH <sub>3</sub> + $h\nu$ → CH <sub>3</sub> C(O)OO + CH <sub>3</sub> O <sub>2</sub>                                                                                                 | jx(ip_CH3C0CH3)                  | see note                    |
| J4302  | TrGCJ  | CH <sub>3</sub> COCH <sub>2</sub> OH + $h\nu$ → CH <sub>3</sub> C(O)OO + HCHO + HO <sub>2</sub>                                                                                                      | J_ACETOL                         | see note                    |
| J4303  | TrGCJ  | MGLYOX + $h\nu$ → CH <sub>3</sub> C(O)OO + CO + HO <sub>2</sub>                                                                                                                                      | jx(ip_MGLYOX)                    | see note                    |
| J4304e | TrGCJ  | CH <sub>3</sub> COCH <sub>2</sub> O <sub>2</sub> H + $h\nu$ → CH <sub>3</sub> C(O)OO + HCHO + OH                                                                                                     | 1.14*jx(ip_CH300H)+J_ACETOL      | Taraborrelli (2014)         |
| J4305e | TrGCJ  | HOCH2COCH2OOH + $h\nu$ → HOCH2CO + HCHO + OH                                                                                                                                                         | 1.14*jx(ip_CH300H)+J_ACETOL      | Taraborrelli (2014)         |
| J4306  | TrGNCJ | iC <sub>3</sub> H <sub>7</sub> ONO <sub>2</sub> + $h\nu$ → CH <sub>3</sub> COCH <sub>3</sub> + NO <sub>2</sub> + HO <sub>2</sub>                                                                     | J_IC3H7N03                       | von Kuhlmann et al. (2003)* |
| J4307  | TrGCJ  | NOA + $h\nu$ → CH <sub>3</sub> C(O)OO + HCHO + NO <sub>2</sub>                                                                                                                                       | J_IC3H7N03+jx(ip_CH3C0CH3)       | see note                    |
| J4309e | TrGCJ  | HYPPO2H + $h\nu$ → CH <sub>3</sub> CHO + HCHO + HO <sub>2</sub> + OH                                                                                                                                 | 1.14*jx(ip_CH300H)               | Taraborrelli (2014)         |
| J4310e | TrGNCJ | PR2O2HNO3 + $h\nu$ → NOA + HO <sub>2</sub> + OH                                                                                                                                                      | 1.14*jx(ip_CH300H)               | Taraborrelli (2014)         |
| J4311e | TrGCJ  | HOCH2COCHO + $h\nu$ → HOCH2CO + CO + HO <sub>2</sub>                                                                                                                                                 | jx(ip_MGLYOX)                    | Taraborrelli (2014)         |
| J4312e | TrGCJ  | CH3COCO2H + $h\nu$ → .5 CH <sub>3</sub> CHO + .8 CO <sub>2</sub> + .4 CH <sub>3</sub> C(O)OO<br>+ .3 HO <sub>2</sub> + .1 CH <sub>3</sub> COOH + .1 OH + .2 CO                                       | JX(IP_MGLYOX)                    | Taraborrelli (2014)         |
| J4313e | TrGCJ  | HCOCOCH2OOH + $h\nu$ → HCOCO3A + HCHO + OH                                                                                                                                                           | 1.14*jx(ip_CH300H)+J_ACETOL      | Taraborrelli (2014)         |
| J4314e | TrGCJ  | HCOCOCH2OOH + $h\nu$ → HOOCH2CO3 + CO + HO <sub>2</sub>                                                                                                                                              | JX(IP_MGLYOX)                    | Taraborrelli (2014)         |
| J4315e | TrGCJ  | HCOCOCHO + $h\nu$ → HCOCO3A + HO <sub>2</sub> + CO                                                                                                                                                   | 2*JX(IP_MGLYOX)                  | Taraborrelli (2014)         |
| J4316e | TrGC   | CH3COCO3H + $h\nu$ → CH <sub>3</sub> C(O)OO + OH + CO <sub>2</sub>                                                                                                                                   | JX(IP_MGLYOX)+1.14*jx(ip_CH300H) | Taraborrelli (2014)         |
| J4317e | TrGC   | CH3CHCO + $h\nu$ → C <sub>2</sub> H <sub>4</sub> + CO                                                                                                                                                | J_ketene*0.36*2.                 | Taraborrelli (2014)*        |
| J4400e | TrGCJ  | LC <sub>4</sub> H <sub>9</sub> OOH + $h\nu$ → OH + 0.254 CO <sub>2</sub> + 0.5552 MEK + 0.5552<br>HO <sub>2</sub> + 0.3178 CH <sub>3</sub> CHO + 0.4448 C <sub>2</sub> H <sub>5</sub> O <sub>2</sub> | 1.14*jx(ip_CH300H)               | Rickard and Pascoe (2009)*  |
| J4401  | TrGCJ  | MVK + $h\nu$ → C <sub>3</sub> H <sub>6</sub> + CO                                                                                                                                                    | jx(ip_MVK)                       | Taraborrelli (2014)*        |
| J4403  | TrGCJ  | MEK + $h\nu$ → CH <sub>3</sub> C(O)OO + C <sub>2</sub> H <sub>5</sub> O <sub>2</sub>                                                                                                                 | 0.42*jx(ip_CHOH)                 | von Kuhlmann et al. (2003)* |

Table 2: Photolysis reactions (... continued)

| #        | labels | reaction                                                                                                                                                                                                                                                                                       | rate coefficient                                   | reference                  |
|----------|--------|------------------------------------------------------------------------------------------------------------------------------------------------------------------------------------------------------------------------------------------------------------------------------------------------|----------------------------------------------------|----------------------------|
| J4404e   | TrGCJ  | $\text{LMEKOOH} + h\nu \rightarrow 0.538 \text{ HCHO} + 0.538 \text{ CO}_2 + 0.459 \text{ HOCH}_2\text{CH}_2\text{O}_2 + 0.079 \text{ C}_2\text{H}_5\text{O}_2 + 0.462 \text{ CH}_3\text{C(O)OO} + 0.462 \text{ CH}_3\text{CHO} + \text{OH}$                                                   | $1.14 * jx(ip\_CH300H) + J\_ACETOL$                | Rickard and Pascoe (2009)* |
| J4405    | TrGCJ  | $\text{BIACET} + h\nu \rightarrow 2 \text{ CH}_3\text{C(O)OO}$                                                                                                                                                                                                                                 | $2.15 * jx(ip\_MGLYOX)$                            | see note                   |
| J4406    | TrGNCJ | $\text{LC4H9NO}_3 + h\nu \rightarrow \text{NO}_2 + 0.254 \text{ CO}_2 + 0.5552 \text{ MEK} + 0.5552 \text{ HO}_2 + 0.3178 \text{ CH}_3\text{CHO} + 0.4448 \text{ C}_2\text{H}_5\text{O}_2$                                                                                                     | $J\_IC3H7N03$                                      | see note                   |
| J4407e   | TrGNCJ | $\text{MPAN} + h\nu \rightarrow .6 \text{ MACO}_3 + .6 \text{ NO}_2 + .4 \text{ MACO}_2 + .4 \text{ NO}_3$                                                                                                                                                                                     | $jx(ip\_PAN)$                                      | Taraborrelli (2014)*       |
| J4409e   | TrGCJ  | $\text{CO}_2\text{H}_3\text{CO}_3\text{H} + h\nu \rightarrow \text{CH}_3\text{COCHOH} + \text{OH} + \text{CO}_2$                                                                                                                                                                               | $1.14 * jx(ip\_CH300H)$                            | Taraborrelli (2014)        |
| J4410    | TrGCJ  | $\text{CO}_2\text{H}_3\text{CO}_3\text{H} + h\nu \rightarrow \text{CH}_3\text{C(O)OO} + \text{HO}_2 + \text{HCOCO}_3\text{H}$                                                                                                                                                                  | $J\_ACETOL$                                        | Rickard and Pascoe (2009)* |
| J4410t2  | TrGCJ  | $\text{CO}_2\text{H}_3\text{CO}_2\text{H} + h\nu \rightarrow \text{CH}_3\text{C(O)OO} + \text{HCOCO}_2\text{H} + \text{HO}_2$                                                                                                                                                                  | $J\_ACETOL$                                        | Taraborrelli (2014)        |
| J4411    | TrGCJ  | $\text{MACR} + h\nu \rightarrow .5 \text{ MACO}_3 + .5 \text{ MACO}_2 + .5 \text{ CO} + \text{HO}_2$                                                                                                                                                                                           | $jx(ip\_MACR)$                                     | see note                   |
| J4412e   | TrGCJ  | $\text{MACROOH} + h\nu \rightarrow \text{MACRO} + \text{OH}$                                                                                                                                                                                                                                   | $1.14 * jx(ip\_CH300H) + 2.77 * jx(ip\_HOCH_2CHO)$ | see note                   |
| J4414    | TrGCJ  | $\text{MACROH} + h\nu \rightarrow \text{CH}_3\text{COCH}_2\text{OH} + \text{CO} + \text{HO}_2 + \text{HO}_2$                                                                                                                                                                                   | $2.77 * jx(ip\_HOCH_2CHO)$                         | see note                   |
| J4415e   | TrGCJ  | $\text{MACO}_3\text{H} + h\nu \rightarrow \text{MACO}_2 + \text{OH}$                                                                                                                                                                                                                           | $1.14 * jx(ip\_CH300H)$                            | Taraborrelli (2014)        |
| J4416e   | TrGCJ  | $\text{LHMVKABOOH} + h\nu \rightarrow .12 \text{ CH}_3\text{COCHOH} + .88 \text{ CH}_3\text{C(O)OO} + .88 \text{ HOCH}_2\text{CHO} + .12 \text{ HCHO} + \text{OH}$                                                                                                                             | $1.14 * jx(ip\_CH300H) + J\_ACETOL$                | Taraborrelli (2014)        |
| J4418e   | TrGCJ  | $\text{CO}_2\text{H}_3\text{CHO} + h\nu \rightarrow \text{CH}_3\text{COCHOH} + \text{CO} + \text{HO}_2$                                                                                                                                                                                        | $jx(ip\_HOCH_2CHO) + J\_ACETOL$                    | Taraborrelli (2014)        |
| J4419    | TrGCJ  | $\text{HO}_{12}\text{CO}_3\text{C}_4 + h\nu \rightarrow \text{CH}_3\text{C(O)OO} + \text{HOCH}_2\text{CHO} + \text{HO}_2$                                                                                                                                                                      | $J\_ACETOL$                                        | Rickard and Pascoe (2009)* |
| J4420e   | TrGCJ  | $\text{BIACETOH} + h\nu \rightarrow \text{CH}_3\text{C(O)OO} + \text{HOCH}_2\text{CO}$                                                                                                                                                                                                         | $2.15 * jx(ip\_MGLYOX)$                            | Taraborrelli (2014)        |
| J4421e   | TrGC   | $\text{HCOCCH}_3\text{CO} + h\nu \rightarrow .5 \text{ OH} + .25 \text{ HCOCOCH}_2\text{O}_2 + .25 \text{ CH}_3\text{C(O)OO} + .5 \text{ CH}_3\text{CHCO} + .5 \text{ CO}$                                                                                                                     | $J\_KETENE$                                        | Taraborrelli (2014)        |
| J4422e   | TrGC   | $\text{CH}_3\text{COCHCO} + h\nu \rightarrow .0192 \text{ CH}_3\text{COCO}_2\text{H} + .1848 \text{ H}_2\text{O}_2 + .2208 \text{ MGLYOX} + .36 \text{ OH} + .36 \text{ CO} + .56 \text{ CH}_3\text{C(O)OO} + .2 \text{ CH}_3\text{CHO} + .2 \text{ CO}_2 + .2 \text{ HCHO} + .2 \text{ HO}_2$ | $J\_KETENE * 0.5$                                  | Taraborrelli (2014)        |
| J4422et2 | TrGC   | $\text{CH}_3\text{COCHCO} + h\nu \rightarrow \text{CH}_3\text{CHCO} + \text{CO}$                                                                                                                                                                                                               | $J\_KETENE * 0.5$                                  | Taraborrelli (2014)        |
| J4423e   | TrGCJ  | $\text{CH}_3\text{COCOCHO} + h\nu \rightarrow \text{CH}_3\text{C(O)OO} + \text{CO} + \text{CO} + \text{HO}_2$                                                                                                                                                                                  | $jx(ip\_MGLYOX)$                                   | Taraborrelli (2014)        |
| J4424e   | TrGCJ  | $\text{CH}_3\text{COCOCHO} + h\nu \rightarrow \text{CH}_3\text{C(O)OO} + \text{HCOCO}_3\text{A}$                                                                                                                                                                                               | $2.15 * jx(ip\_MGLYOX)$                            | Taraborrelli (2014)        |
| J4424et2 | TrGC   | $\text{CH}_3\text{COCOCO}_2\text{H} + h\nu \rightarrow \text{CH}_3\text{C(O)OO} + \text{CO} + \text{CO}_2 + \text{HO}_2$                                                                                                                                                                       | $3.15 * jx(ip\_MGLYOX)$                            | Taraborrelli (2014)        |
| J4502et2 | TrGCJ  | $\text{LISOPACOOH} + h\nu \rightarrow \text{LHC}_4\text{ACCHO} + \text{HO}_2 + \text{OH}$                                                                                                                                                                                                      | $1.14 * jx(ip\_CH300H)$                            | Rickard and Pascoe (2009)* |
| J4503et2 | TrGNCJ | $\text{LISOPACNO}_3 + h\nu \rightarrow \text{LHC}_4\text{ACCHO} + \text{HO}_2 + \text{NO}_2$                                                                                                                                                                                                   | $0.59 * J\_IC3H7N03$                               | see note                   |

Table 2: Photolysis reactions (... continued)

| #      | labels | reaction                                                                                                                                                         | rate coefficient                         | reference                   |
|--------|--------|------------------------------------------------------------------------------------------------------------------------------------------------------------------|------------------------------------------|-----------------------------|
| J4504e | TrGCJ  | ISOPBOOH + $h\nu$ → MVK + HCHO + HO <sub>2</sub> + OH                                                                                                            | 1.14*jx(ip_CH300H)                       | Rickard and Pascoe (2009)*  |
| J4505e | TrGNCJ | ISOPBNO <sub>3</sub> + $h\nu$ → MVK + HCHO + HO <sub>2</sub> + NO <sub>2</sub>                                                                                   | 2.84*J_IC3H7N03                          | see note                    |
| J4506e | TrGCJ  | ISOPDOOH + $h\nu$ → MACR + HCHO + HO <sub>2</sub> + OH                                                                                                           | 1.14*jx(ip_CH300H)                       | Rickard and Pascoe (2009)*  |
| J4507  | TrGNCJ | ISOPDNO <sub>3</sub> + $h\nu$ → MACR + HCHO + HO <sub>2</sub> + NO <sub>2</sub>                                                                                  | J_IC3H7N03                               | see note                    |
| J4508e | TrGNCJ | NISOPOOH + $h\nu$ → NC4CHO + HO <sub>2</sub> + OH                                                                                                                | 1.14*jx(ip_CH300H)                       | Rickard and Pascoe (2009)*  |
| J4509  | TrGNCJ | NC4CHO + $h\nu$ → NOA + 2 CO + 2 HO <sub>2</sub>                                                                                                                 | jx(ip_MACR)                              | see note                    |
| J4510e | TrGNCJ | LNISOOH + $h\nu$ → NOA + OH + .5 HOCHCHO + .5 CO + .5 HO <sub>2</sub> + .5 CO <sub>2</sub>                                                                       | 1.14*jx(ip_CH300H)                       | Taraborrelli et al. (2009)* |
| J4511e | TrGCJ  | LHC4ACCHO + $h\nu$ → .5 LHC4ACCO <sub>3</sub> + .5 HO <sub>2</sub> + .5 OH + .25 MACRO <sub>2</sub> + .25 LHMVKABO <sub>2</sub>                                  | jx(ip_MACR)                              | Taraborrelli (2014)*        |
| J4512e | TrGCJ  | LC578OOH + $h\nu$ → .25 CH <sub>3</sub> COCH <sub>2</sub> OH + .75 MGLYOX + .25 HOCHCHO + .75 HOCH <sub>2</sub> CHO + .75 HO <sub>2</sub> + OH                   | 1.14*jx(ip_CH300H)+ 2.77*jx(ip_HOCH2CHO) | Taraborrelli (2014)         |
| J4513e | TrGCJ  | LHC4ACCO <sub>3</sub> H + $h\nu$ → OH + .5 MACRO <sub>2</sub> + .5 LHMVKABO <sub>2</sub> + OH + CO <sub>2</sub>                                                  | J_HPALD                                  | Taraborrelli (2014)*        |
| J4514  | TrGNCJ | LC5PAN1719 + $h\nu$ → .6 LHC4ACCO <sub>3</sub> + .6 NO <sub>2</sub> + .2 MACRO <sub>2</sub> + .2 LHMVKABO <sub>2</sub> + .4 CO <sub>2</sub> + .4 NO <sub>3</sub> | jx(ip_PAN)                               | see note                    |
| J4515e | TrGCJ  | HCOC <sub>5</sub> + $h\nu$ → MACO <sub>2</sub> + HOCH <sub>2</sub> CO                                                                                            | 0.5*jx(ip_MVK)                           | Taraborrelli (2014)         |
| J4516e | TrGCJ  | C59OOH + $h\nu$ → CH <sub>3</sub> COCH <sub>2</sub> OH + HOCH <sub>2</sub> CO + OH                                                                               | J_ACETOL+1.14*jx(ip_CH300H)              | Taraborrelli (2014)         |
| J4517e | TrGCJ  | ZCODC23DBCOOH + $h\nu$ → LHC4ACCO <sub>3</sub> + OH                                                                                                              | J_HPALD                                  | Taraborrelli (2014)         |
| J4518e | TrGCJ  | ZCO3HC23DBCOD + $h\nu$ → .62 EZCH3CO <sub>2</sub> CHCHO + .38 EZCHOCCH <sub>3</sub> CHO <sub>2</sub> + OH + CO <sub>2</sub>                                      | J_HPALD                                  | Taraborrelli (2014)         |
| J4519e | TrGCJ  | C1OOHC2OOHC4OD + $h\nu$ → CH <sub>3</sub> COCH <sub>2</sub> O <sub>2</sub> H + OH + 2 CO + HO <sub>2</sub>                                                       | 2.77*JX(IP_HOCH2CHO)                     | Taraborrelli (2014)         |
| J4520e | TrGCJ  | C1OOHC2OOHC4OD + $h\nu$ → .5 CH <sub>3</sub> COCH <sub>2</sub> O <sub>2</sub> H + .5 HOCHCHO + .5 CO <sub>2</sub> H <sub>3</sub> CHO + .5 HCHO + 1.5 OH          | 2.*1.14*JX(IP_CH300H)                    | Taraborrelli (2014)         |
| J4523e | TrGCJ  | C1ODC2OOHC4OD + $h\nu$ → MGLYOX + HOCHCHO + OH                                                                                                                   | 1.14*JX(IP_CH300H)                       | Taraborrelli (2014)         |
| J4524e | TrGCJ  | C1ODC2OOHC4OD + $h\nu$ → CO <sub>2</sub> H <sub>3</sub> CHO + CO + HO <sub>2</sub> + OH                                                                          | 2.*2.77*JX(IP_HOCH2CHO)                  | Taraborrelli (2014)*        |
| J4525  | TrGCJ  | PEROXYRINGC2OOH + $h\nu$ → CH <sub>3</sub> COCH <sub>2</sub> OOCH <sub>2</sub> CHO + HO <sub>2</sub> + OH                                                        | 1.14*JX(IP_CH300H)                       | Taraborrelli (2014)         |
| J4526  | TrGCJ  | PEROXYRINGC2OOH + $h\nu$ → HCHO + OH + HO <sub>2</sub> + CO <sub>2</sub> H <sub>3</sub> CHO                                                                      | 1.14*JX(IP_CH300H)                       | Taraborrelli (2014)*        |

Table 2: Photolysis reactions (... continued)

| #      | labels | reaction                                                                                                                       | rate coefficient            | reference           |
|--------|--------|--------------------------------------------------------------------------------------------------------------------------------|-----------------------------|---------------------|
| J4525e | TrGCJ  | ZCODC23DBCOD + $h\nu$ → .5 CH <sub>3</sub> COCHCO + .5 HCOCCH <sub>3</sub> CO + CO + HO <sub>2</sub> + OH                      | jx(ip_N02)*0.1*0.5          | Taraborrelli (2014) |
| J4526e | TrGCJ  | CH <sub>3</sub> COCH <sub>2</sub> OOCH <sub>2</sub> CHO + $h\nu$ → CH <sub>3</sub> C(O)OO + HCHO + GLYOX + HO <sub>2</sub>     | 1.14*JX(IP_CH300H)+J_ACETOL | Taraborrelli (2014) |
| J4527e | TrGCJ  | CH <sub>3</sub> COCH <sub>2</sub> OOCH <sub>2</sub> CHO + $h\nu$ → CH <sub>3</sub> C(O)OO + HCHO + HCHO + CO + HO <sub>2</sub> | jx(ip_H0CH2CHO)             | Taraborrelli (2014) |

\*Notes:

J-values are calculated with an external module and then supplied to the MECCA chemistry.

Values that originate from the Master Chemical Mechanism (MCM) by Rickard and Pascoe (2009) are translated according in the following way:

J(11) → jx(ip\_COH2)  
J(12) → jx(ip\_CHOH)  
J(15) → jx(ip\_HOCH2CHO)  
J(18) → jx(ip\_MACR)  
J(22) → jx(ip\_ACETOL)  
J(23)+J(24) → jx(ip\_MVK)  
J(31)+J(32)+J(33) → jx(ip\_GLYOX)  
J(34) → jx(ip\_MGLYOX)  
J(41) → jx(ip\_CH300H)  
J(53) → J(iC<sub>3</sub>H<sub>7</sub>ONO<sub>2</sub>)  
J(54) → J(iC<sub>3</sub>H<sub>7</sub>ONO<sub>2</sub>)  
J(55) → J(iC<sub>3</sub>H<sub>7</sub>ONO<sub>2</sub>)  
J(56)+J(57) → jx(ip\_NOA)

J4207: It is assumed that J(PHAN) is the same as J(PAN).

J4212: It is assumed that J(ETHOHNO<sub>3</sub>) is the same as J(iC<sub>3</sub>H<sub>7</sub>ONO<sub>2</sub>).

J4302: Following von Kuhlmann et al. (2003), we use J(CH<sub>3</sub>COCH<sub>2</sub>OH) = 0.11\*jx(ip\_CHOH). As an additional factor, the quantum yield of 0.65 is taken from Orlando et al. (1999a).

J4306: Following von Kuhlmann et al. (2003), we use J(iC<sub>3</sub>H<sub>7</sub>ONO<sub>2</sub>) = 3.7\*jx(ip\_PAN).

J4307: NOA contains the chromophores of both CH<sub>3</sub>COCH<sub>3</sub> and a nitrate group. It is assumed here that the J values are additive, i.e.: J(NO<sub>3</sub>) = J(CH<sub>3</sub>COCH<sub>3</sub>) + J(iC<sub>3</sub>H<sub>7</sub>ONO<sub>2</sub>).

J4317e: products Chong and Kistiakowsky 1964, 0.36 quantum yield at 334nm Kelley and Hase1975, factor 2 because of bigger structure and fit to C<sub>2</sub>H<sub>4</sub>LBA

J4401: Romero et al(2005)

J4406: It is assumed that J(LC4H<sub>9</sub>NO<sub>3</sub>) is the same as J(iC<sub>3</sub>H<sub>7</sub>ONO<sub>2</sub>).

J4405: It is assumed that J(BIACET) is 2.15 times larger than J(MGLYOX), consistent with the photol-

ysis rate coefficients used in the MCM (Rickard and Pascoe, 2009).

J4414: It is assumed that J(MACROH) is 2.77 times larger than J(HOCH<sub>2</sub>CHO), consistent with the photolysis rate coefficients used in the MCM (Rickard and Pascoe, 2009).

J4505: It is assumed that J(ISOPBNO<sub>3</sub>) = 2.84 × J(iC<sub>3</sub>H<sub>7</sub>ONO<sub>2</sub>), consistent with the photolysis rate coefficients used in the MCM (Rickard and Pascoe, 2009).

J4509: It is assumed that J(NC<sub>4</sub>CHO) is the same as J(MACR).

J4511e: Peroxy vinyl radical chemistry approximated

J4513e: Peroxy vinyl radical chemistry approximated

J4514: It is assumed that J(LC5PAN1719) is the same as J(PAN).

J4524e: the loss of C<sub>4</sub>OD is neglected

J4526: decomposition of a dialkoxy radical

## References

- Atkinson, R.: Gas-phase tropospheric chemistry of volatile organic compounds: 1. Alkanes and alkenes, *J. Phys. Chem. Ref. Data*, 26, 215–290, 1997.
- Atkinson, R.: Kinetics of the gas-phase reactions of OH radicals with alkanes and cycloalkanes, *Atmos. Chem. Phys.*, 3, 2233–2307, 2003.
- Atkinson, R. and Arey, J.: Atmospheric Degradation of Volatile Organic Compounds, *Chemical Reviews*, 103(12), 4605–4638, 2003.
- Atkinson, R., Baulch, D. L., Cox, R. A., Hampson, Jr., R. F., Kerr, J. A., Rossi, M. J., and Troe, J.: Summary of evaluated kinetic and photochemical data for atmospheric chemistry: Web version August 1999, <http://www.iupac-kinetic.ch.cam.ac.uk>, 1999.
- Atkinson, R., Baulch, D. L., Cox, R. A., Crowley, J. N., Hampson, Jr., R. F., Hynes, R. G., Jenkin, M. E., Kerr, J. A., Rossi, M. J., and Troe, J.: Summary of evaluated kinetic and photochemical data for atmospheric chemistry: Web version March 2005, <http://www.iupac-kinetic.ch.cam.ac.uk>, 2005.
- Atkinson, R., Baulch, D. L., Cox, R. A., Crowley, J. N., Hampson, R. F., Hynes, R. G., Jenkin, M. E., Rossi, M. J., and Troe, J.: Evaluated kinetic and photochemical data for atmospheric chemistry: Volume II – gas phase reactions of organic species, *Atmos. Chem. Phys.*, 6, 3625–4055, 2006.
- Baeza-Romero, M. T., Glowacki, D. R., Blitz, M. A., Heard, D., Pilling, M. J., Rickard, A., and Seakins, P.: A combined experimental and theoretical study of the reaction between methylglyoxal and OH/OD radical: OH regeneration, *Phys. Chem. Chem. Phys.*, 9, 4114–4128, doi:10.1039/b702916k, 2007.
- Baker, J., Arey, J., and Atkinson, R.: Kinetics of the Gas-Phase Reactions of OH Radicals, NO<sub>3</sub> Radicals and O<sub>3</sub> with Three C<sub>7</sub>-Carbonyls Formed From The Atmospheric Reactions of Myrcene, Ocimene and Terpinolene, *J. Atmos. Chem.*, pp. 241–260, 2004.
- Baulch, D. L., Bowman, C. T., Cobos, C., Cox, R. A., Just, T., Kerr, J. A., Pilling, M. J., Stocker, D., Troe, J., Tsang, W., Walker, R. W., and Warnatz, J.: Evaluated Kinetic Data for Combustion Modeling: Supplement II, *J. Phys. Chem. Ref. Data*, 34, 757–1397, 2005.
- Canosa-Mas, C. E., King, M. D., Lopez, R., Percival, C. J., Wayne, R. P., Shallcross, D. E., Pyle, J. A., and Daele, V.: Is the reaction between CH<sub>3</sub>(O)O<sub>2</sub> and NO<sub>3</sub> important in the night-time troposphere?, *J. Chem. Soc. Faraday Trans.*, 92, 2211–2222, 1996.
- Capouet, M., Müller, J.-F., Ceulemans, K., Compernelle, S., Vereecken, L., and Peeters, J.: Modeling aerosol formation in alpha-pinene photo-oxidation experiments, *J. Geophys. Res.*, 8, doi:10.1029/2007JD008995, 2008.
- Christensen, L. E., Okumura, M., Sander, S. P., Salawitch, R. J., Toon, G. C., Sen, B., Blavier, J.-F., and Jucks, K. W.: Kinetics of HO<sub>2</sub> + HO<sub>2</sub> → H<sub>2</sub>O<sub>2</sub> + O<sub>2</sub>: Implications for stratospheric H<sub>2</sub>O<sub>2</sub>, *Geophys. Res. Lett.*, 29, doi:10.1029/2001GL014525, 2002.
- Feierabend, K. J., Zhu, L., Talukdar, R. K., and Burkholder, J. B.: Rate coefficients for the OH + HC(O)C(O)H (Glyoxal) reaction between 210 and 390 K, *J. Phys. Chem. A*, 112, 73–82, 2008.
- Fruekilde, P., Hjorth, J., Jensen, N., Kotzias, D., and Larsen, B.: Ozonolysis at vegetation surfaces: a source of acetone, 4-oxopentanal, 6-methyl-5-hepten-2-one, and geranyl acetone in the troposphere, *Atmos. Environ.*, doi:10.1016/S1352-2310(97)00485-8, 1997.
- Grosjean, E., Grosjean, D., and Seinfeld, J. H.: Gas+Phase Reaction of Ozone with Trans-2-Hexenal, Trans-2-Hexenyl Acetate, Ethylvinyl Ketone, and 6-Methyl-5-Hepten-2-One, *Int. J. Chem. Kinetics*, pp. 373–382, 1996.
- Hatakeyama, S., Honda, S., and Akimoto, H.: Rate constants and mechanism for reactions of ketenes with OH radicals in air at 299±2K, *Bull. Chem. Soc. Jpn.*, pp. 2157–2162, 1985.
- Hermans, I., Müller, J.-F., Nguyen, T. L., Jacobs, P. A., and Peeters, J.: Kinetics of α-Hydroxyalkylperoxyl Radicals in Oxidation Processes. HO<sub>2</sub>-Initiated Oxidation of Ketones/Aldehydes near the Tropopause, *J. Phys. Chem. A*, pp. 4303–4311, doi:10.1021/jp044080v, 2005.
- Hites, R. A. and Turner, A. M.: Rate Constants for the Gas-Phase β-Myrcene+OH and Isoprene+OH Reactions as a Function of Temperature, *Int. J. Chem. Kinetics*, pp. 407–413, 2009.
- IUPAC: Evaluated Kinetic Data, <http://iupac.pole-ether.fr/>, 2013.
- Jenkin, M. E., Hurley, M. D., and Wallington, T. J.: Investigation of the radical product channel of the CH<sub>3</sub>C(O)O<sub>2</sub> + HO<sub>2</sub> reaction in the gas phase, *Phys. Chem. Chem. Phys.*, 9, 3149–3162, doi:10.1039/b702757e, 2007.
- Kircher, C. C. and Sander, S. P.: Kinetics and mechanism of HO<sub>2</sub> and DO<sub>2</sub> disproportionations, *J. Phys. Chem.*, 88, 2082–2091, 1984.
- Lewis, P. J., Bennett, K. A., and Harvey, J. N.: A computational study of the atmospheric oxidation of

- nopinone, *Phys. Chem. Chem. Phys.*, pp. 1643–1649, doi:10.1039/b418909d, 2005.
- Lockwood, A. L., Shepson, P. B., Fiddler, M. N., and Alaghmand, M.: Isoprene nitrates: preparation, separation, identification, yields, and atmospheric chemistry, *Atmos. Chem. Phys.*, 10, 6169–6178, doi:10.5194/acp-10-6169-2010, 2010.
- McCabe, D. C., Gierczak, T., Talukdar, R. K., and Ravishankara, A. R.: Kinetics of the reaction  $\text{OH} + \text{CO}$  under atmospheric conditions, *Geophys. Res. Lett.*, 28, 3135–3138, 2001.
- Mellouki, A. and Mu, Y.: On the atmospheric degradation of pyruvic acid in the gas phase, *J. Photochem. Photobiol. A: Chem.*, doi:10.1016/S1010-6030(03)00070-4, 2003.
- Mollner, A. K., Valluvadasan, S., Feng, L., Sprague, M. K., Okumura, M., Milligan, D. B., Bloss, W. J., Sander, S. P., Martien, P. T., Harley, R. A., McCoy, A. B., and Carter, W. P. L.: Rate of Gas Phase Association of Hydroxyl Radical and Nitrogen Dioxide, *Science*, doi:10.1126/science.1193030, 2010.
- Nguyen, T. L., Peeters, J., and Vereecken, L.: Theoretical study of the gas-phase ozonolysis of  $\beta$ -pinene ( $\text{C}_{10}\text{H}_{16}$ ), *Phys. Chem. Chem. Phys.*, doi:10.1039/b822984h, 2009.
- Orlando, J. J. and Tyndall, G. S.: The atmospheric chemistry of the  $\text{HC(O)CO}$  radical, *Int. J. Chem. Kinetics*, 33, 149–156, 2001.
- Orlando, J. J., Tyndall, G. S., Bilde, M., Ferronato, C., Wallington, T. J., Vereecken, L., and Peeters, J.: Laboratory and theoretical study of the oxy radicals in the OH- and Cl-initiated oxidation of ethene, *J. Phys. Chem. A*, 102, 8116–8123, 1998a.
- Orlando, J. J., Tyndall, G. S., Bilde, M., Ferronato, C., Wallington, T. J., Vereecken, L., and Peeters, J.: Laboratory and Theoretical Study of the Oxy Radicals in the OH- and Cl-Initiated Oxidation of Ethene, *J. Phys. Chem. A*, 102, 8116–8123, 1998b.
- Orlando, J. J., Tyndall, G. S., Fracheboud, J. M., Estupinan, E. G., Haberkorn, S., and Zimmer, A.: The rate and mechanism of the gas-phase oxidation of hydroxyacetone, *Atmos. Environ.*, 33, 1621–1629, 1999a.
- Orlando, J. J., Tyndall, G. S., and Paulson, S. E.: Mechanism of the OH-initiated oxidation of methacrolein, *Geophys. Res. Lett.*, 26, 1999b.
- Orlando, J. J., Noziere, B., Tyndall, G. S., Orzechowska, G. E., Paulson, S. E., and Rudich, Y.: Product studies of the OH- and ozone-initiated oxidation of some monoterpenes, *J. Geophys. Res.*, pp. 11 561–11 572, 2000.
- Orlando, J. J., Tyndall, G. S., Bertman, S. B., Chen, W., and Burkholder, J. B.: Rate coefficient for the reaction of OH with  $\text{CH}_2=\text{C}(\text{CH}_3)\text{C}(\text{O})\text{OONO}_2$  (MPAN), *Atmos. Environ.*, 36, 1895–1900, 2002.
- Paulot, F., Crounse, J. D., Kjaergaard, H. G., Kroll, J. H., Seinfeld, J. H., and Wennberg, P. O.: Isoprene photooxidation: new insights into the production of acids and organic nitrates, *Atmos. Chem. Phys.*, 9, 1479–1501, 2009a.
- Paulot, F., Crounse, J. D., Kjaergaard, H. G., Kürten, A., St. Clair, J. M., Seinfeld, J. H., and Wennberg, P. O.: Unexpected Epoxide Formation in the Gas-Phase Photooxidation of Isoprene, *Science*, 325, doi:10.1126/science.1172910, 2009b.
- Rickard, A. and Pascoe, S.: The Master Chemical Mechanism (MCM), <http://mcm.leeds.ac.uk>, 2009.
- Sander, S. P., Finlayson-Pitts, B. J., Friedl, R. R., Golden, D. M., Huie, R. E., Kolb, C. E., Kurylo, M. J., Molina, M. J., Moortgat, G. K., Orkin, V. L., and Ravishankara, A. R.: Chemical Kinetics and Photochemical Data for Use in Atmospheric Studies, Evaluation Number 14, JPL Publication 02-25, Jet Propulsion Laboratory, Pasadena, CA, 2003.
- Sander, S. P., Friedl, R. R., Golden, D. M., Kurylo, M. J., Moortgat, G. K., Keller-Rudek, H., Wine, P. H., Ravishankara, A. R., Kolb, C. E., Molina, M. J., Finlayson-Pitts, B. J., Huie, R. E., and Orkin, V. L.: Chemical Kinetics and Photochemical Data for Use in Atmospheric Studies, Evaluation Number 15, JPL Publication 06-2, Jet Propulsion Laboratory, Pasadena, CA, <http://jpldataeval.jpl.nasa.gov>, 2006.
- Sivakumaran, V., Hölscher, D., Dillon, T. J., and Crowley, J. N.: Reaction between OH and HCHO: temperature dependent rate coefficients (202–399 K) and product pathways (298 K), *Phys. Chem. Chem. Phys.*, 5, 4821–4827, 2003.
- Smith, A. M., Rigler, E., Kwok, E. S. C., and Atkinson, R.: Kinetics and Products of the Gas-Phase Reactions of 6-Methyl-5-hepten-2-one and trans-Cinnamaldehyde with OH and  $\text{NO}_3$  Radicals and  $\text{O}_3$  at  $296(\pm 2)\text{K}$ , *Environ. Sci. Technol.*, pp. 1781–1785, 1996.
- Taraborrelli, D.: Isoprene Oxidation and its Impacts on the Atmospheric Composition, Ph.D. thesis, Johannes Gutenberg-Universität, Mainz, Germany, <http://d-nb.info/1003538770/34>, 2010.

- Taraborrelli, D.: Mainz Organics Mechanism, (in preparation), 2014.
- Taraborrelli, D., Lawrence, M. G., Butler, T. M., Sander, R., and Lelieveld, J.: Mainz Isoprene Mechanism 2 (MIM2): an isoprene oxidation mechanism for regional and global atmospheric modelling, *Atmos. Chem. Phys.*, 9, 2751–2777, <http://www.atmos-chem-phys.net/9/2751/>, 2009.
- Tyndall, G. S., Cox, R. A., Granier, C., Lesclaux, R., Moortgat, G. K., Pilling, M. J., Ravishankara, A. R., and Wallington, T. J.: The atmospheric chemistry of small organic peroxy radicals, *J. Geophys. Res.*, 106D, 12 157–12 182, 2001.
- Vereecken, L. and Peeters, J.: A theoretical study of the OH-initiated gas-phase oxidation mechanism of  $\alpha$ -pinene ( $C_{10}H_{16}$ ): first generation products, *Phys. Chem. Chem. Phys.*, pp. 3802–3815, doi:10.1039/c2cp23711c, 2012.
- Vereecken, L., Müller, J.-F., and Peeters, J.: Low-volatility poly-oxygenates in the OH-initiated atmospheric oxidation of  $\alpha$ -pinene: impact of non-traditional peroxy radical chemistry, *Phys. Chem. Chem. Phys.*, 9, 5241–5248, doi:10.1039/b708023a, 2007.
- von Kuhlmann, R.: Tropospheric photochemistry of ozone, its precursors and the hydroxyl radical: A 3D-modeling study considering non-methane hydrocarbons, Ph.D. thesis, Johannes Gutenberg-Universität, Mainz, Germany, 2001.
- von Kuhlmann, R., Lawrence, M. G., Crutzen, P. J., and Rasch, P. J.: A model for studies of tropospheric ozone and nonmethane hydrocarbons: Model description and ozone results, *J. Geophys. Res.*, 108D, doi:10.1029/2002JD002893, 2003.
- Wolfe, G. M., Thornton, J. A., Bouvier-Brown, N. C., Goldstein, A. H., Park, J.-H., McKay, M., Matross, D. M., Mao, J., Brune, W. H., LaFranchi, B. W., Browne, E. C., Min, K.-E., Wooldridge, P. J., Cohen, R. C., Crounse, J. D., Faloona, I. C., Gilman, J. B., Kuster, W. C., de Gouw, J. A., Huisman, A., and Keutsch, F. N.: The Chemistry of Atmosphere-Forest Exchange (CAFE) Model Part 2: Application to BEARPEX-2007 observations, *Atmos. Chem. Phys.*, 11, 1269–1294, doi:10.5194/acp-11-1269-2011, 2011.
