# Supplementary material for: Observation and modelling of HO x radicals in a boreal forest
Source: Copernicus journal article supplement (doi:10.5194/acp-14-8723-2014), 2014-08-26
Supplement: Supplementary file 3 [file acp-14-8723-2014-supplement.zip]

**HO<sub>x</sub> recycling pathways under different conditions of observed  
radiation and total OH reactivity during HUMPPA-COPEC  
2010**

This document is part of the electronic supplement to our article  
“Observation and modelling of HO<sub>x</sub> radicals in a boreal forest”  
in ACP (2014), available at:  
<http://www.atmospheric-chemistry-and-physics.net>

Table S1: HO<sub>x</sub> budget under different conditions of observed total OH reactivity (moderate/**high**) at low radiation ( $J_{O(^1D)} \leq 3 \times 10^{-6} \text{ s}^{-1}$ ). Radical production (green), recycling (blue), and loss (red) pathways are indicated by bold arrows. All rates are given in  $10^6 \text{ molec cm}^{-3} \text{ s}^{-1}$ .

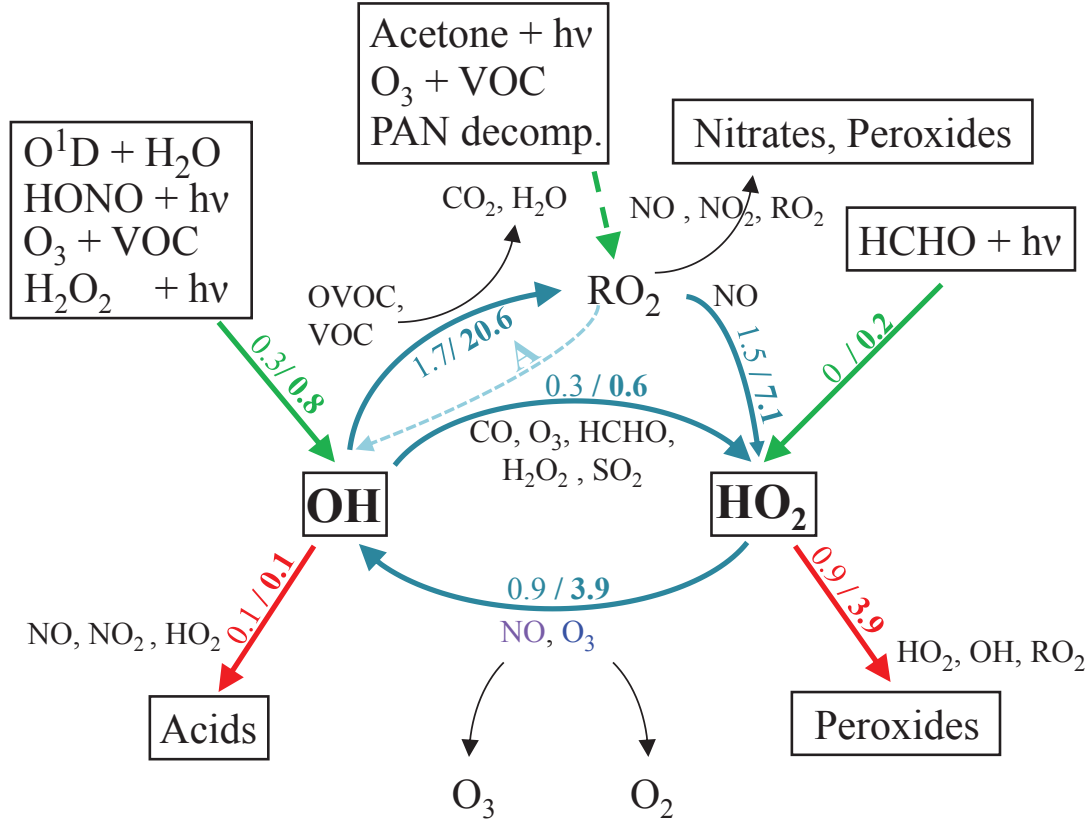

| $k'_{OH} \leq 15 \text{ s}^{-1}$                                                                                                                                                                                                                                                                                                                                                                                                                                                                                                                                                                                                                                                                                                 | $k'_{OH} > 15 \text{ s}^{-1}$                                                                                                                                                                                                                                                                                                                                                                                                                                                                                                                                                                                                                                                                                                                                                                                                                                                                                                                                                                    |
|----------------------------------------------------------------------------------------------------------------------------------------------------------------------------------------------------------------------------------------------------------------------------------------------------------------------------------------------------------------------------------------------------------------------------------------------------------------------------------------------------------------------------------------------------------------------------------------------------------------------------------------------------------------------------------------------------------------------------------|--------------------------------------------------------------------------------------------------------------------------------------------------------------------------------------------------------------------------------------------------------------------------------------------------------------------------------------------------------------------------------------------------------------------------------------------------------------------------------------------------------------------------------------------------------------------------------------------------------------------------------------------------------------------------------------------------------------------------------------------------------------------------------------------------------------------------------------------------------------------------------------------------------------------------------------------------------------------------------------------------|
| <ul style="list-style-type: none"> <li>• <math>P_{OH}^{total} = (2.1 \pm 0.8) \times 10^6 \text{ molec cm}^{-3} \text{ s}^{-1}</math></li> <li>• <math>HO_2 + NO/O_3</math> is inhibited (<math>P_{OH, HO_2+NO/O_3} \approx 1 \times 10^6 \text{ molec cm}^{-3} \text{ s}^{-1}</math>)</li> <li>• <math>\sim 40\%</math> of <math>P_{OH}^{total}</math> is unknown (<math>P_{OH}^{missing} \approx 1 \times 10^6 \text{ molec cm}^{-3} \text{ s}^{-1}</math>)</li> <li>• Potential OH sources: <ul style="list-style-type: none"> <li>- Ozonolysis of unmeasured VOCs</li> <li>- could be related to <math>NO_3</math> (<math>P_{NO_3} \approx 1 \times 10^6 \text{ molec cm}^{-3} \text{ s}^{-1}</math>)</li> </ul> </li> </ul> | <ul style="list-style-type: none"> <li>• <math>P_{OH}^{total} = (21.3 \pm 7.2) \times 10^6 \text{ molec cm}^{-3} \text{ s}^{-1}</math></li> <li>• <math>\sim 80\%</math> of <math>P_{OH}^{total}</math> is unknown (<math>P_{OH}^{missing} \approx 17 \times 10^6 \text{ molec cm}^{-3} \text{ s}^{-1}</math>)</li> <li>• about 16% of <math>P_{OH}^{total}</math> by <math>HO_2 + NO/O_3</math> (<math>P_{OH, HO_2+NO/O_3} \approx 4 \times 10^6 \text{ molec cm}^{-3} \text{ s}^{-1}</math>)</li> <li>• <math>\sim 60\%</math> of the <math>RO_2</math> production rate imply unknown loss processes that could lead to direct OH recycling</li> </ul> <p style="text-align: center;">• <math>RO_2</math> sink is missing <math>\rightarrow</math> potential OH source</p> <p><math>\Rightarrow</math> alkylperoxy radicals + <math>HO_2</math> (Thornton et al., 2002; Hasson et al., 2004; Jenkin et al., 2007; Dillon and Crowley, 2008) and H-shifts (Peeters et al., 2009) are likely</p> |

Table S2: Median levels and variability of relevant trace gases under different conditions of observed radiation and total OH reactivity.

|                                         | $J_{\text{O}(^1\text{D})} > 3 \times 10^{-6} \text{ s}^{-1}$                                                                                                                                                                                                                                                                                                                                                                                                                                                                                                                                                                                                                                                                                                                                                                       | $J_{\text{O}(^1\text{D})} \leq 3 \times 10^{-6} \text{ s}^{-1}$                                                                                                                                                                                                                                                                                                                                                                                                                                                                                                                                                                                                                                                                                                                                                                       |
|-----------------------------------------|------------------------------------------------------------------------------------------------------------------------------------------------------------------------------------------------------------------------------------------------------------------------------------------------------------------------------------------------------------------------------------------------------------------------------------------------------------------------------------------------------------------------------------------------------------------------------------------------------------------------------------------------------------------------------------------------------------------------------------------------------------------------------------------------------------------------------------|---------------------------------------------------------------------------------------------------------------------------------------------------------------------------------------------------------------------------------------------------------------------------------------------------------------------------------------------------------------------------------------------------------------------------------------------------------------------------------------------------------------------------------------------------------------------------------------------------------------------------------------------------------------------------------------------------------------------------------------------------------------------------------------------------------------------------------------|
| $k'_{\text{OH}} \leq 15 \text{ s}^{-1}$ | <p>OH <math>\approx (1.0 \pm 0.8) \times 10^6 \text{ molec. cm}^{-3}</math></p> <p>HO<sub>2</sub> <math>\approx (10 \pm 1) \text{ ppt}_V</math></p> <p>O<sub>3</sub> <math>\approx (33 \pm 2) \text{ ppb}_V</math></p> <p>NO <math>\approx (46 \pm 16) \text{ ppt}_V</math></p> <p>NO<sub>2</sub> <math>\approx (280 \pm 40) \text{ ppt}_V</math></p> <p>CO <math>\approx (85 \pm 1) \text{ ppb}_V</math></p> <p>C<sub>5</sub>H<sub>8</sub> <math>\approx (145 \pm 30) \text{ ppt}_V</math></p> <p><math>\alpha</math>-pinene <math>\approx (63 \pm 15) \text{ ppt}_V</math></p> <p><math>\beta</math>-pinene <math>\approx (16 \pm 4) \text{ ppt}_V</math></p> <p><math>\beta</math>-myrcene <math>\approx (5 \pm 1) \text{ ppt}_V</math></p> <p><math>\Delta^3</math>-carene <math>\approx (30 \pm 8) \text{ ppt}_V</math></p>   | <p>OH <math>\approx (3.8 \pm 3.0) \times 10^5 \text{ molec. cm}^{-3}</math></p> <p>HO<sub>2</sub> <math>\approx (10 \pm 6) \text{ ppt}_V</math></p> <p>O<sub>3</sub> <math>\approx (35 \pm 7) \text{ ppb}_V</math></p> <p>NO <math>\approx (3 \pm 39) \text{ ppt}_V</math></p> <p>NO<sub>2</sub> <math>\approx (570 \pm 210) \text{ ppt}_V</math></p> <p>CO <math>\approx (96 \pm 5) \text{ ppb}_V</math></p> <p>C<sub>5</sub>H<sub>8</sub> <math>\approx (62 \pm 65) \text{ ppt}_V</math></p> <p><math>\alpha</math>-pinene <math>\approx (68 \pm 67) \text{ ppt}_V</math></p> <p><math>\beta</math>-pinene <math>\approx (20 \pm 17) \text{ ppt}_V</math></p> <p><math>\beta</math>-myrcene <math>\approx (5 \pm 4) \text{ ppt}_V</math></p> <p><math>\Delta^3</math>-carene <math>\approx (44 \pm 44) \text{ ppt}_V</math></p>     |
| $k'_{\text{OH}} > 15 \text{ s}^{-1}$    | <p>OH <math>\approx (6.4 \pm 5.6) \times 10^5 \text{ molec. cm}^{-3}</math></p> <p>HO<sub>2</sub> <math>\approx (27 \pm 2) \text{ ppt}_V</math></p> <p>O<sub>3</sub> <math>\approx (51 \pm 1) \text{ ppb}_V</math></p> <p>NO <math>\approx (28 \pm 7) \text{ ppt}_V</math></p> <p>NO<sub>2</sub> <math>\approx (320 \pm 20) \text{ ppt}_V</math></p> <p>CO <math>\approx (93 \pm 1) \text{ ppb}_V</math></p> <p>C<sub>5</sub>H<sub>8</sub> <math>\approx (112 \pm 13) \text{ ppt}_V</math></p> <p><math>\alpha</math>-pinene <math>\approx (80 \pm 4) \text{ ppt}_V</math></p> <p><math>\beta</math>-pinene <math>\approx (17 \pm 1) \text{ ppt}_V</math></p> <p><math>\beta</math>-myrcene <math>\approx (5.0 \pm 0.3) \text{ ppt}_V</math></p> <p><math>\Delta^3</math>-carene <math>\approx (38 \pm 2) \text{ ppt}_V</math></p> | <p>OH <math>\approx (6.3 \pm 2.0) \times 10^5 \text{ molec. cm}^{-3}</math></p> <p>HO<sub>2</sub> <math>\approx (22 \pm 4) \text{ ppt}_V</math></p> <p>O<sub>3</sub> <math>\approx (51.0 \pm 0.3) \text{ ppb}_V</math></p> <p>NO <math>\approx (17 \pm 5) \text{ ppt}_V</math></p> <p>NO<sub>2</sub> <math>\approx (290 \pm 30) \text{ ppt}_V</math></p> <p>CO <math>\approx (92 \pm 1) \text{ ppb}_V</math></p> <p>C<sub>5</sub>H<sub>8</sub> <math>\approx (110 \pm 5) \text{ ppt}_V</math></p> <p><math>\alpha</math>-pinene <math>\approx (61 \pm 8) \text{ ppt}_V</math></p> <p><math>\beta</math>-pinene <math>\approx (14 \pm 1) \text{ ppt}_V</math></p> <p><math>\beta</math>-myrcene <math>\approx (4.0 \pm 0.5) \text{ ppt}_V</math></p> <p><math>\Delta^3</math>-carene <math>\approx (27 \pm 5) \text{ ppt}_V</math></p> |
